# Supplementary material for: Stereoselective synthesis of 1,3-disubstituted isoindolines via Rh(iii)-catalyzed tandem oxidative olefination–cyclization of 4-aryl cyclic sulfamidates
Source: Royal Society of Chemistry journal article supplement (doi:10.1039/c5cc09888b), 2016-01-01
Supplement: c5cc09888b2.pdf [file c5cc09888b2.pdf]

## Supplementary Information-2

### Copies of $^1\text{H-NMR}$ , $^{13}\text{C-NMR}$ spectra and chiral HPLC chromatograms

#### Stereoselective synthesis of 1,3-disubstituted isoindolines via Rh(III)-catalyzed tandem oxidative olefination-cyclization of 4-aryl cyclic sulfamidates

Se-Mi Son<sup>a,+</sup>, Yeon Ji Seo<sup>a,b,+</sup>, and Hyeon-Kyu Lee<sup>a,b\*</sup>

a) Korea Chemical Bank, Korea Research Institute of Chemical Technology, PO Box 107, Yuseong, Daejeon 305-600, Korea.

b) Department of Medicinal Chemistry and Pharmacology, University of Science and Technology, 113 Gwahango, Yuseong, Daejeon 305-333, Korea.

<sup>+</sup> These two authors contributed equally to this work

Tel: +82-42-860-7016; Fax: +82-42-860-7096

*e-mail: leehk@kRICT.re.kr*

## Table of Contents

|                                                                         |       |
|-------------------------------------------------------------------------|-------|
| 1. $^1\text{H}$ -NMR and $^{13}\text{C}$ -NMR spectra of <b>3</b> ..... | 3-55  |
| 1-1. 2D-NOESY spectrum of <b>3d</b> .....                               | 11    |
| 1-2. 2D-NOESY spectrum of <b>3e</b> .....                               | 14    |
| 1-3. 2D-NOESY spectrum of <b>3n</b> .....                               | 33    |
| 2. $^1\text{H}$ -NMR and $^{13}\text{C}$ -NMR spectra of <b>5</b> ..... | 56    |
| 3. $^1\text{H}$ -NMR and $^{13}\text{C}$ -NMR spectra of <b>6</b> ..... | 58    |
| 4. $^1\text{H}$ -NMR and $^{13}\text{C}$ -NMR spectra of <b>7</b> ..... | 60    |
| 5. Chiral HPLC Chromatograms of <b>3</b> .....                          | 62-80 |

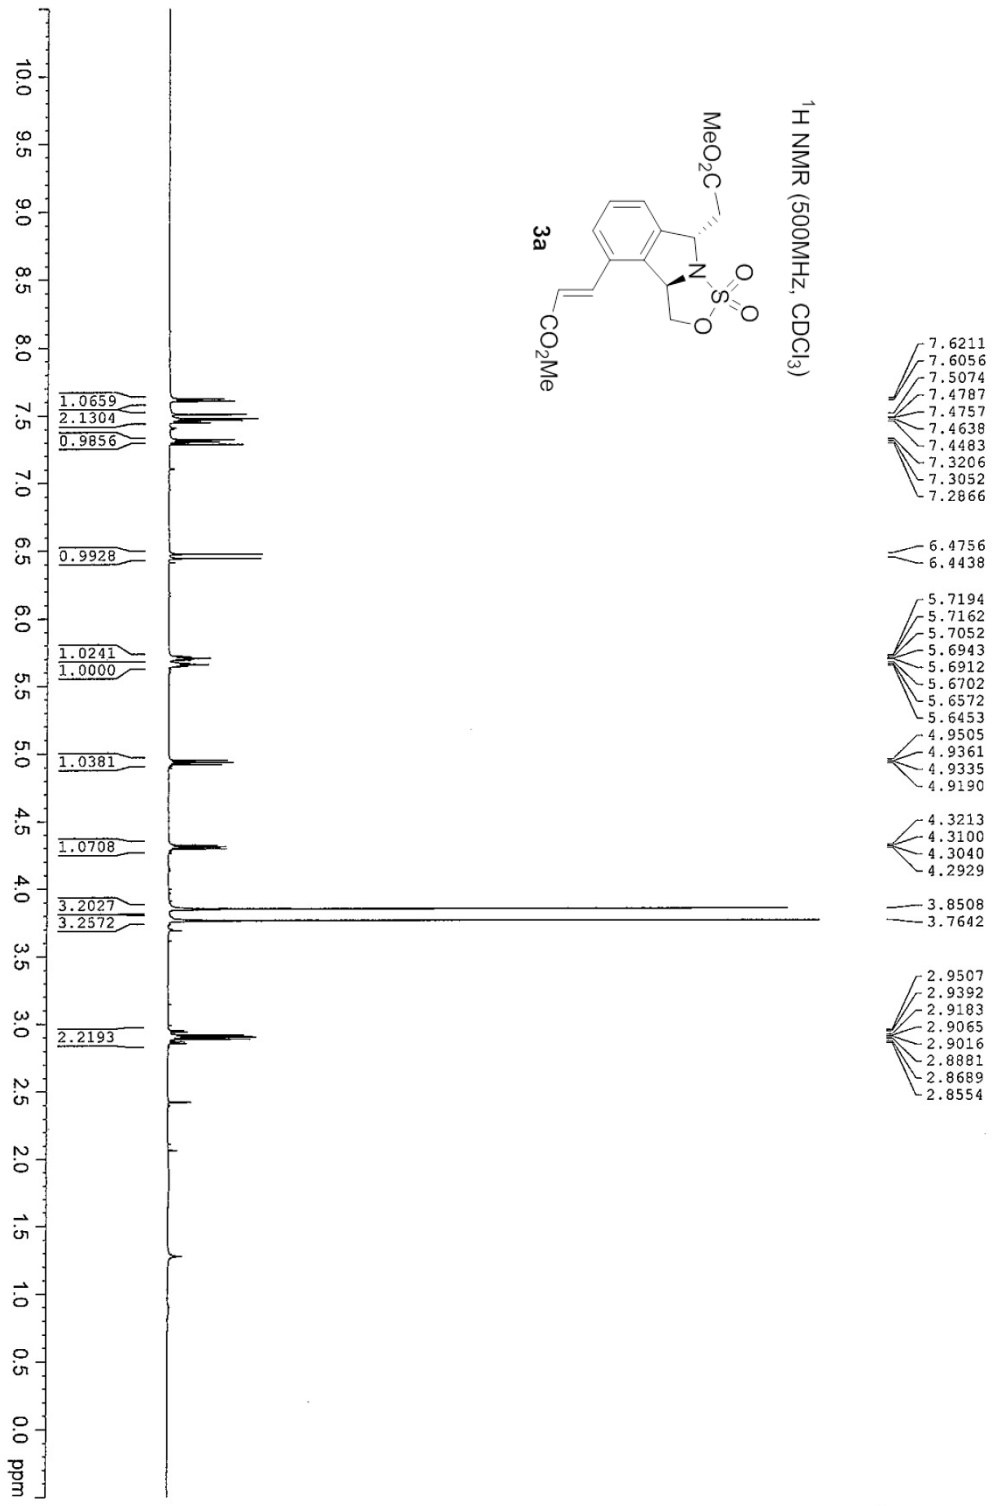

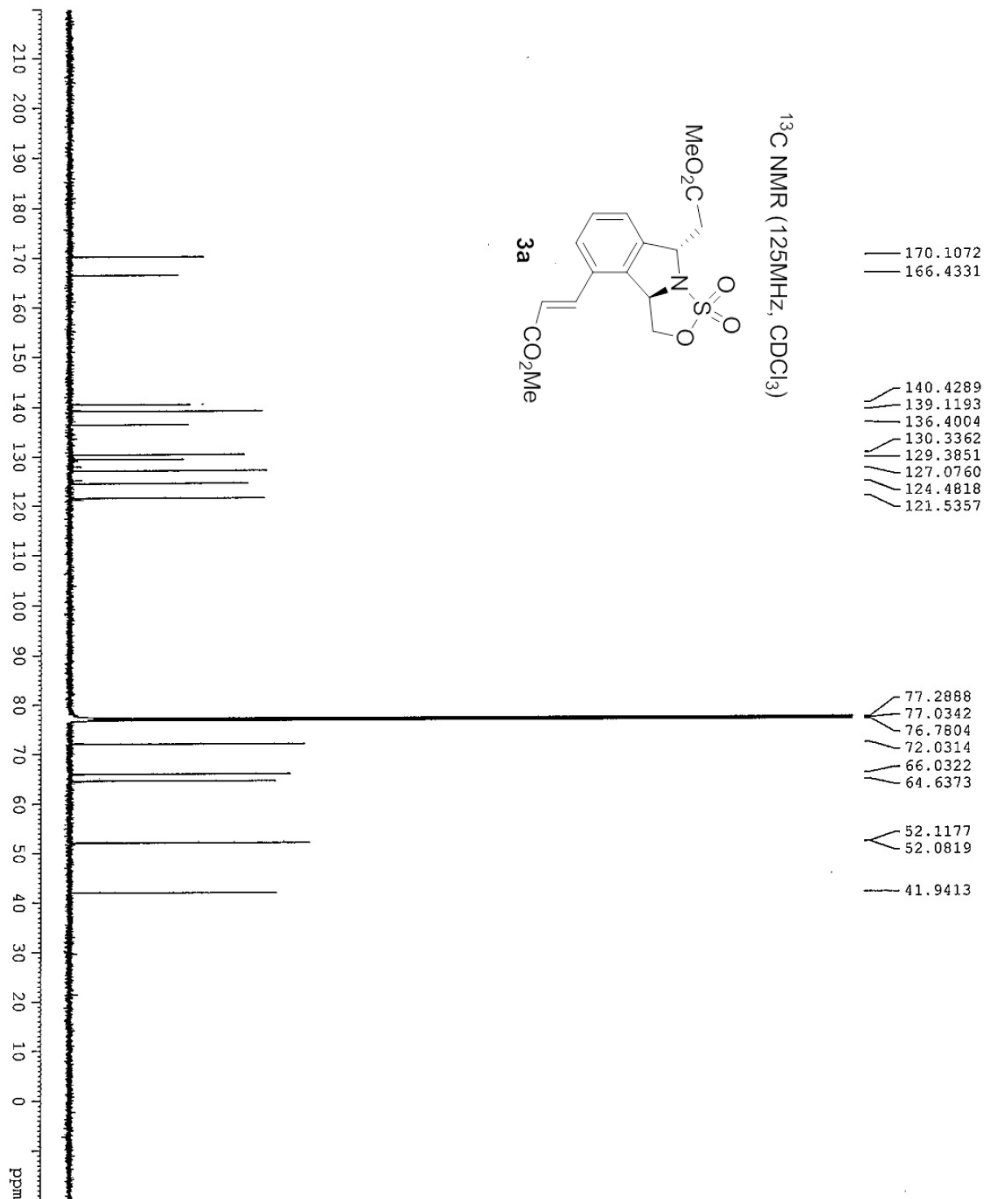

```

NAME SSM_150903_ph.cc
EXPNO 1
PROCNO 1
Date_ 20150904
Time 21.36
INSTRUM spect
PROBHD 5 mm DUL 13C-1
PULPROG zgpg30
TD 32768
SOLVENT CDCl3
NS 3000
DS 2
SWH 30303.031 Hz
FIDRES 0.924775 Hz
AQ 0.5407385 sec
RG 4096
DW 16.500 usec
DE 6.00 usec
TE 297.9 K
D1 2.00000000 sec
D11 0.03000000 sec
TDO 1

===== CHANNEL f1 =====
NUC1 13C
P1 8.00 usec
PL1 1.40 dB
PL1W 70.60439301 W
SFO1 125.7703661 MHz

===== CHANNEL f2 =====
CPDPRG2 waltz16
NUC2 1H
PCPDZ 100.00 usec
FLZ 1.90 dB
PL12 16.00 dB
PL13 19.00 dB
PL1W 27.23316002 W
PL1Z 0.44167015 W
PL13W 0.22135943 W
SFO2 500.1320005 MHz
SI 32768
SF 125.7577890 MHz
WDW EM
SSB 0
LB 1.00 Hz
GB 0
PC 1.40

```

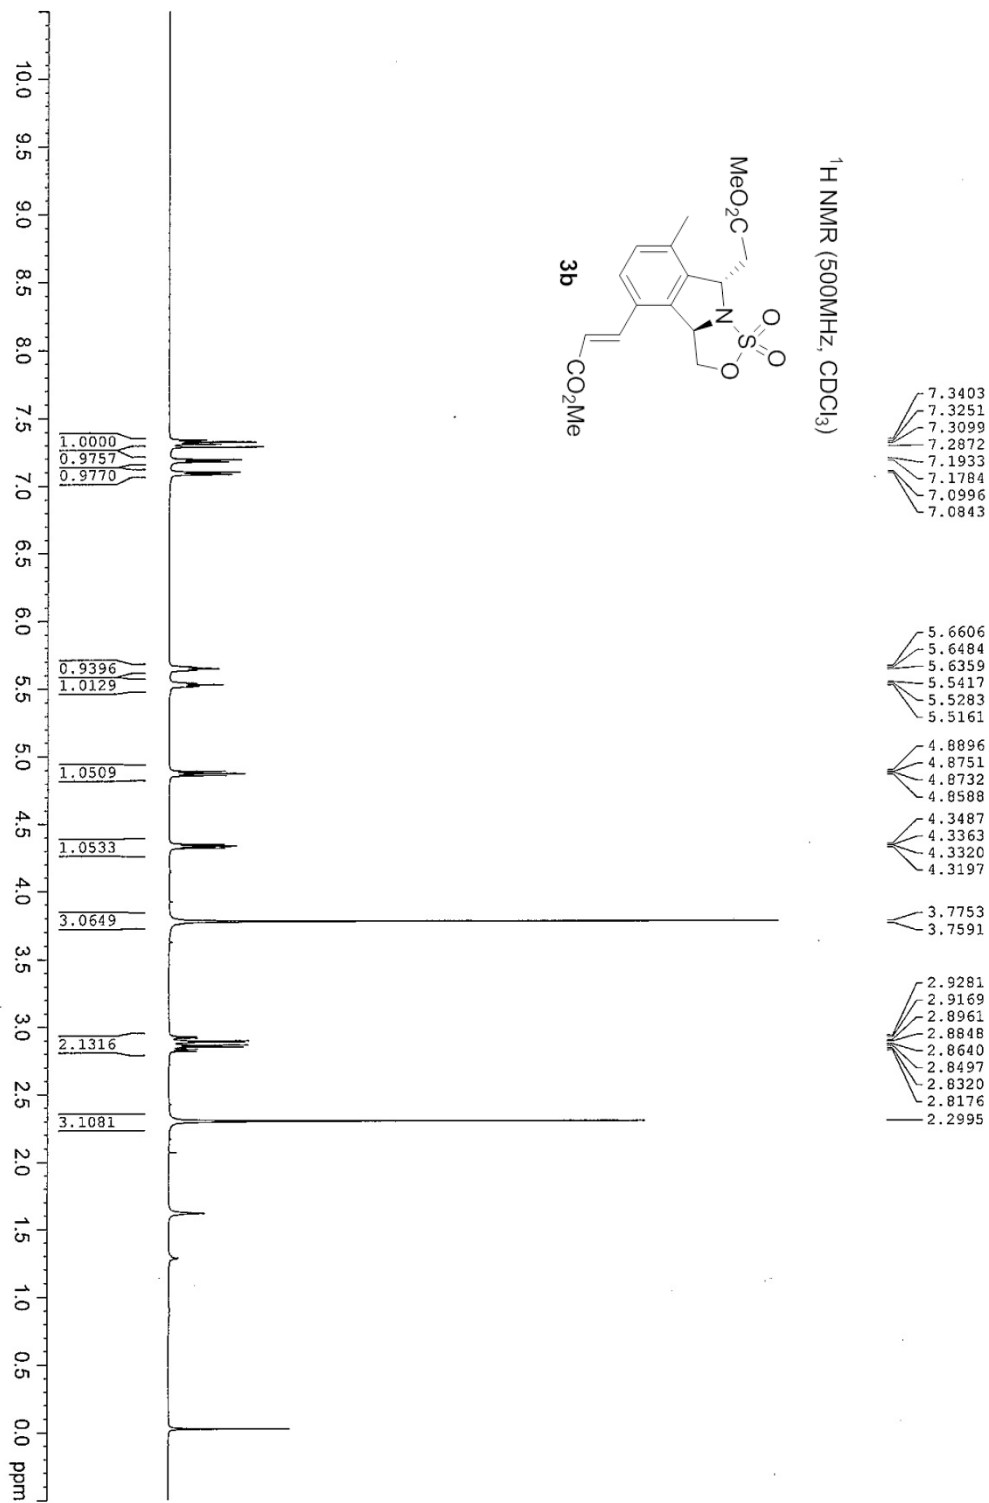

<sup>13</sup>C NMR (125MHz, CDCl<sub>3</sub>)

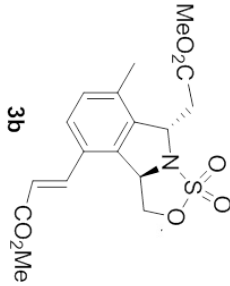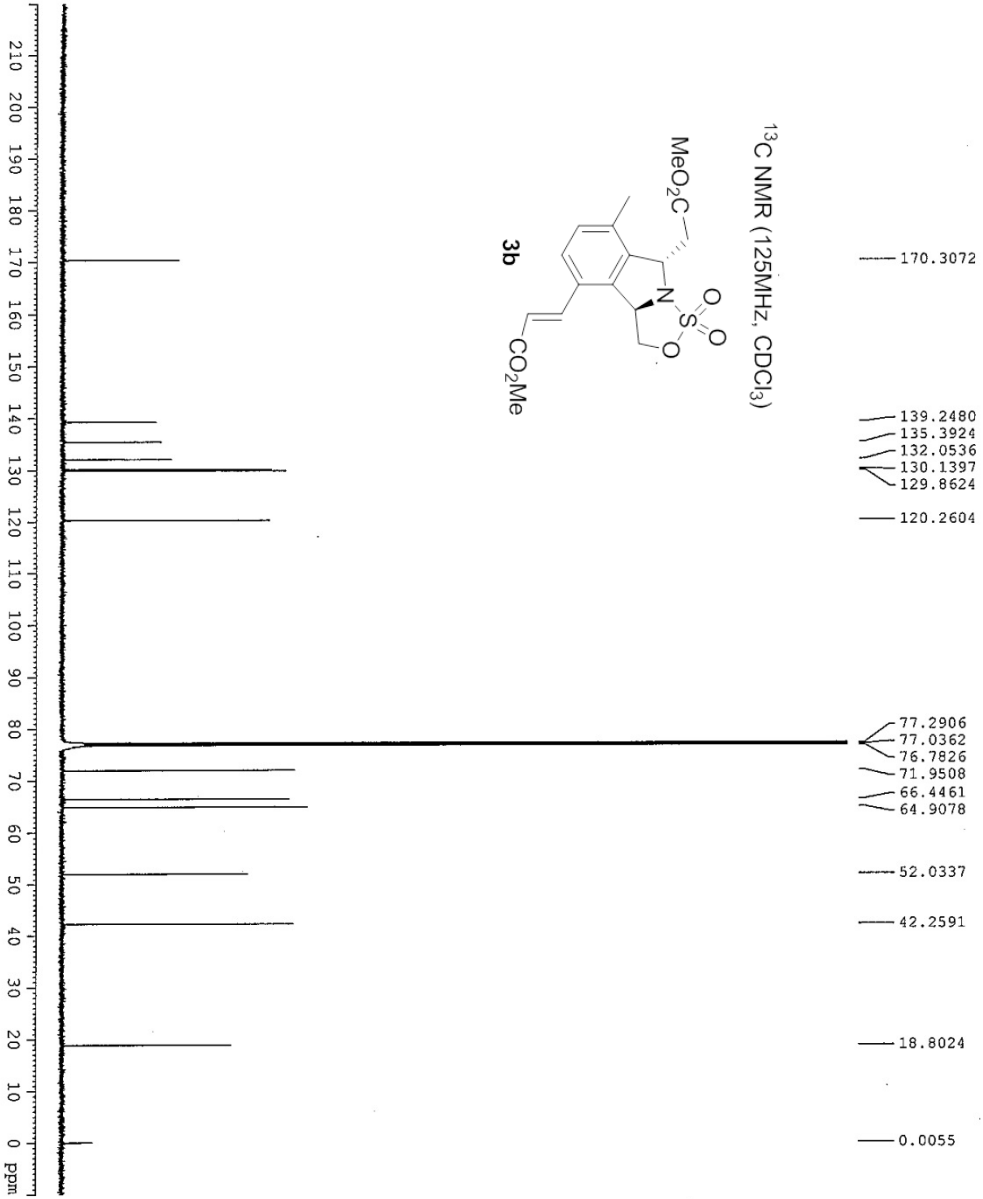

```

NAME          SSM_150331_Me2_CC
EXPNO         1
PROCNO        2
Date_         20150401
Time_         11.34
INSTRUM       spect
PROBHD        5 mm DUL 13C-1
PULPROG       zgpg30
TD            32768
SOLVENT       CDCl3
NS            2912
DS            2
SWH           30303.031 Hz
FIDRES       0.924775 Hz
AQ           0.5407385 sec
RG           362
DE           16.500 usec
TE           296.3 K
D1           2.00000000 sec
D11          0.03000000 sec
TD0          1

===== CHANNEL f1 =====
NUC1          13C
P1            8.00 usec
PL1           1.40 dB
EPL1         70.60438301 W
SFO1         129.7703661 MHz

===== CHANNEL f2 =====
CPDPRG2      walz16
NUC2          1H
PCPD2        100.00 usec
PL2           -1.90 dB
PL12         16.00 dB
PL13         19.00 dB
PL14         27.23316002 W
PL15         0.44167015 W
PL16         0.22135943 W
SFO2         500.1320005 MHz
SI           32768
SF           125.7577890 MHz
WDW          EM
SSB          0
GB           0
PC           1.40
  
```

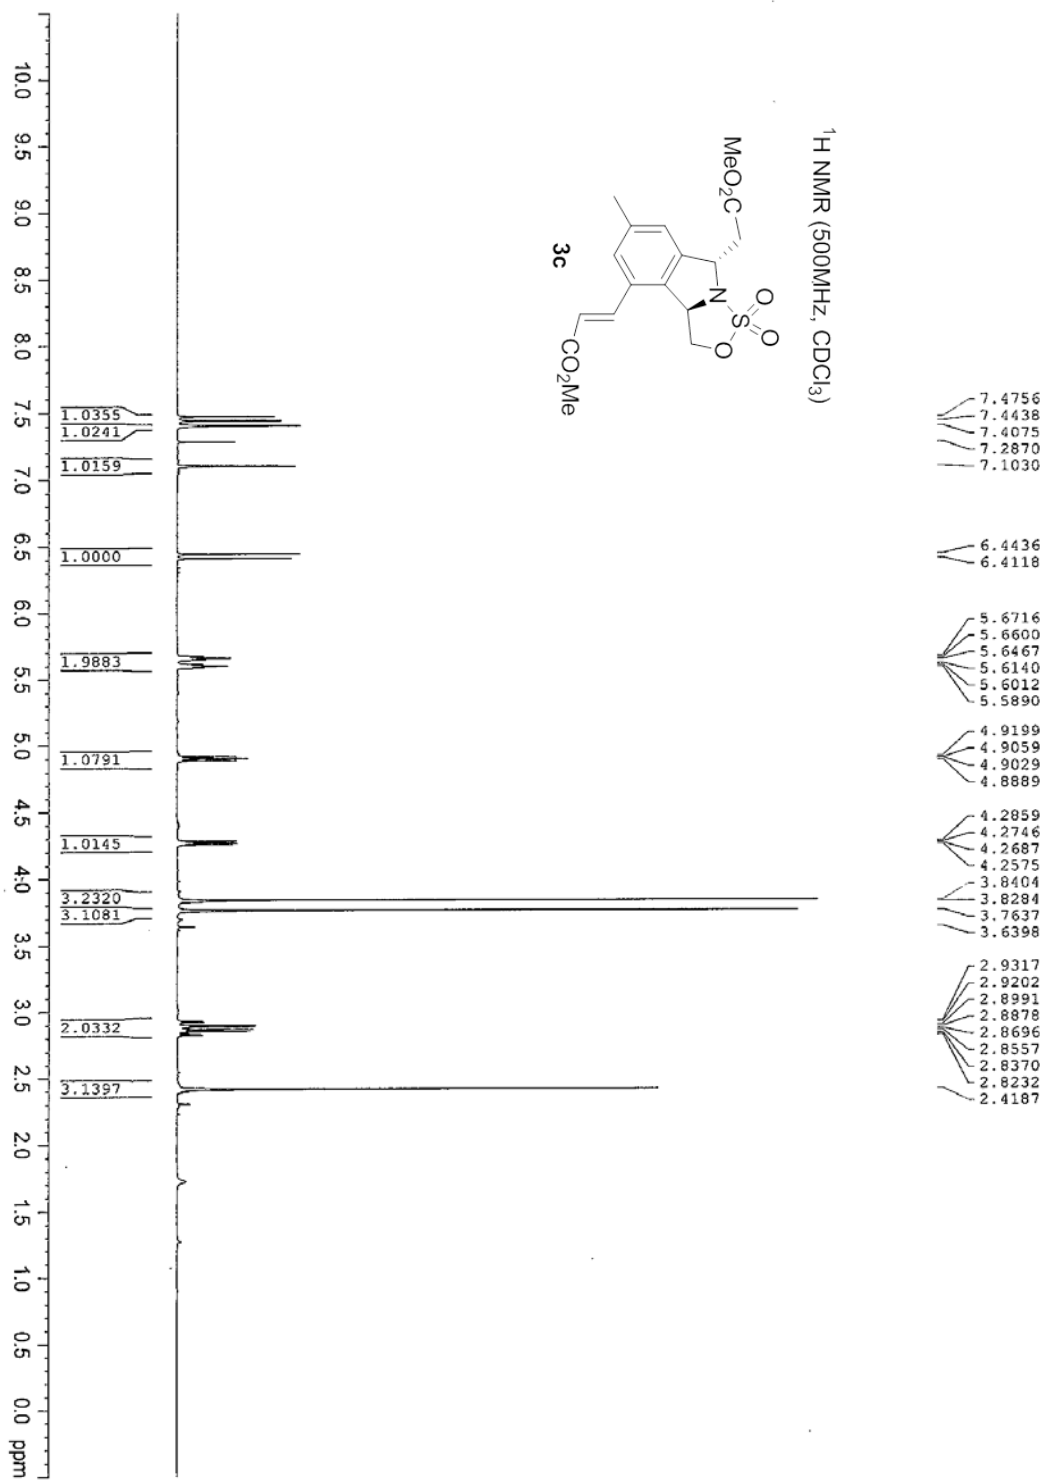

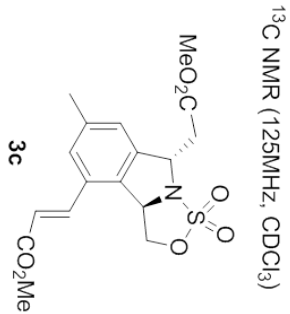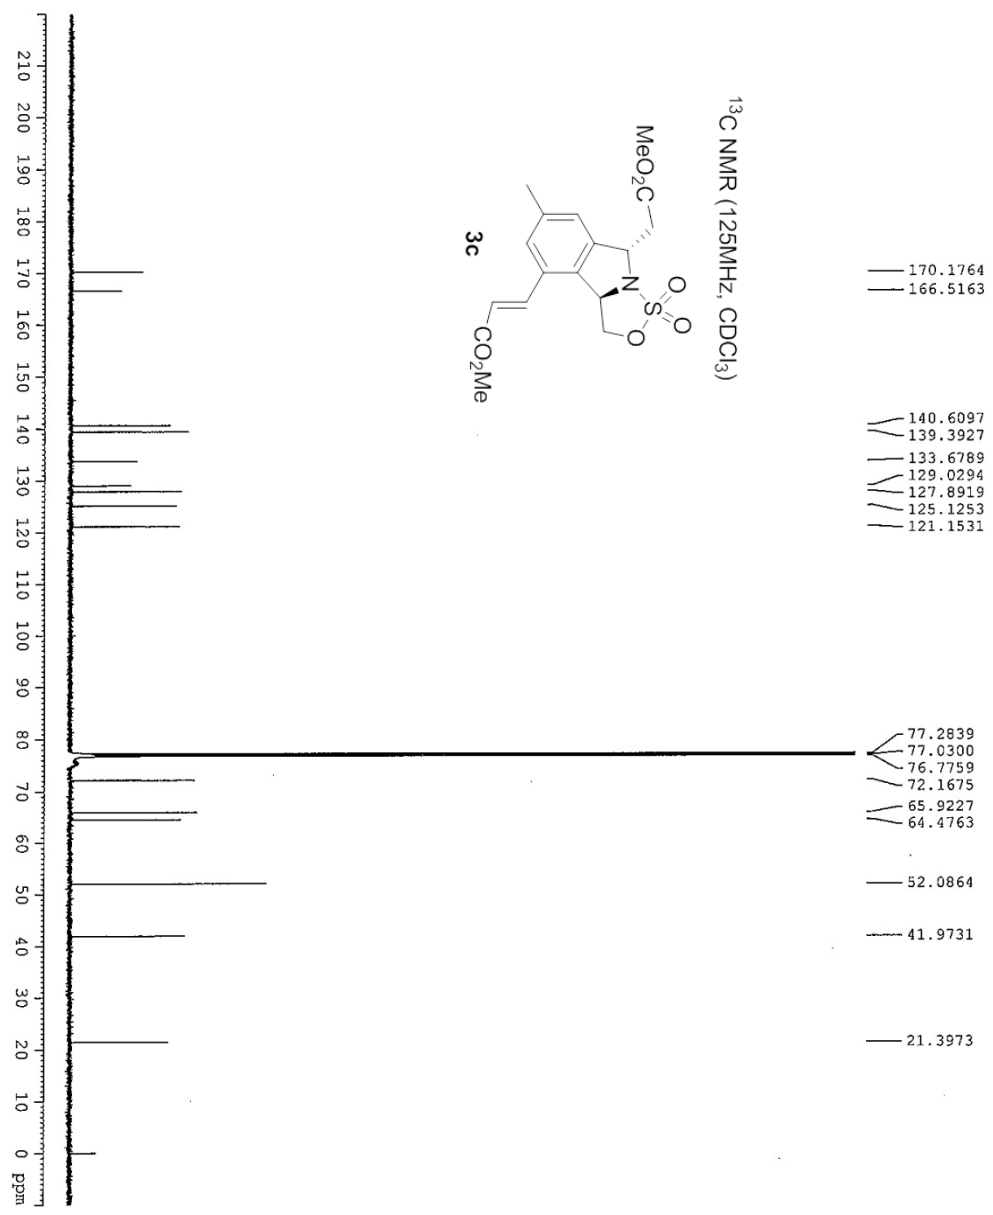

|         |                   |
|---------|-------------------|
| NAME    | SSM_150331_Me4_CC |
| EXPNO   | 1                 |
| PROCNO  | 1                 |
| Date_   | 20150331          |
| Time    | 22.03             |
| INSTRUM | 5 mm DUL 13C-1    |
| PROBHD  | specC             |
| PULPROG | zgpg30            |
| TD      | 32768             |
| SOLVENT | CDCl3             |
| NS      | 3000              |
| DS      | 2                 |
| SWH     | 30303.031 Hz      |
| FIDRES  | 0.924775 Hz       |
| AQ      | 0.5407385 sec     |
| RG      | 161.3             |
| DW      | 16.500 usec       |
| DE      | 6.00 usec         |
| TE      | 296.2 K           |
| D1      | 2.00000000 sec    |
| D11     | 0.03000000 sec    |
| TD0     | 1                 |

  

|                        |                 |
|------------------------|-----------------|
| ===== CHANNEL f1 ===== |                 |
| NUC1                   | <sup>13</sup> C |
| P1                     | 8.00 usec       |
| P11                    | 1.40 dB         |
| P11W                   | 70.60435301 W   |
| SFO1                   | 125.7703661 MHz |
| ===== CHANNEL f2 ===== |                 |
| CPDPRG2                | waltz16         |
| NUC2                   | <sup>1</sup> H  |
| PCPD2                  | 100.00 usec     |
| P12                    | -1.90 dB        |
| P112                   | 16.00 dB        |
| P113                   | 19.00 dB        |
| P12W                   | 27.23316002 W   |
| P112W                  | 0.44167015 W    |
| P113W                  | 0.22135943 W    |
| SFO2                   | 500.1328005 MHz |
| SI                     | 32768           |
| SP                     | 125.7577890 MHz |
| WDW                    | EM              |
| SSB                    | 0               |
| LB                     | 1.00 Hz         |
| GB                     | 0               |
| PC                     | 1.40            |



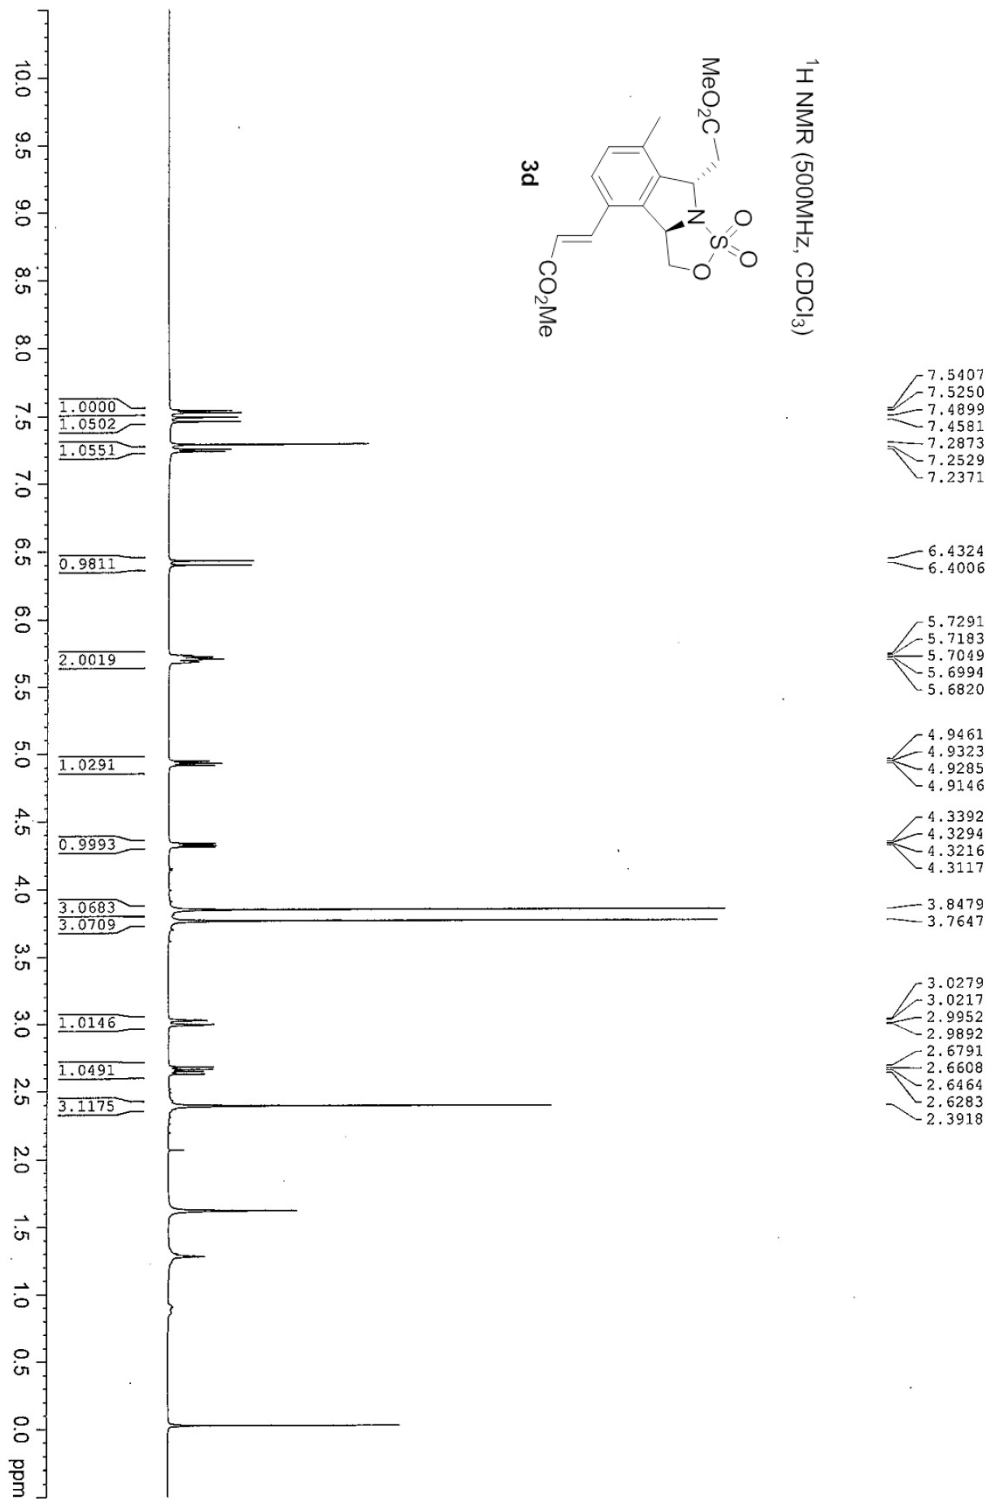

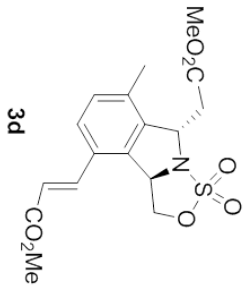

<sup>13</sup>C NMR (125MHz, CDCl<sub>3</sub>)

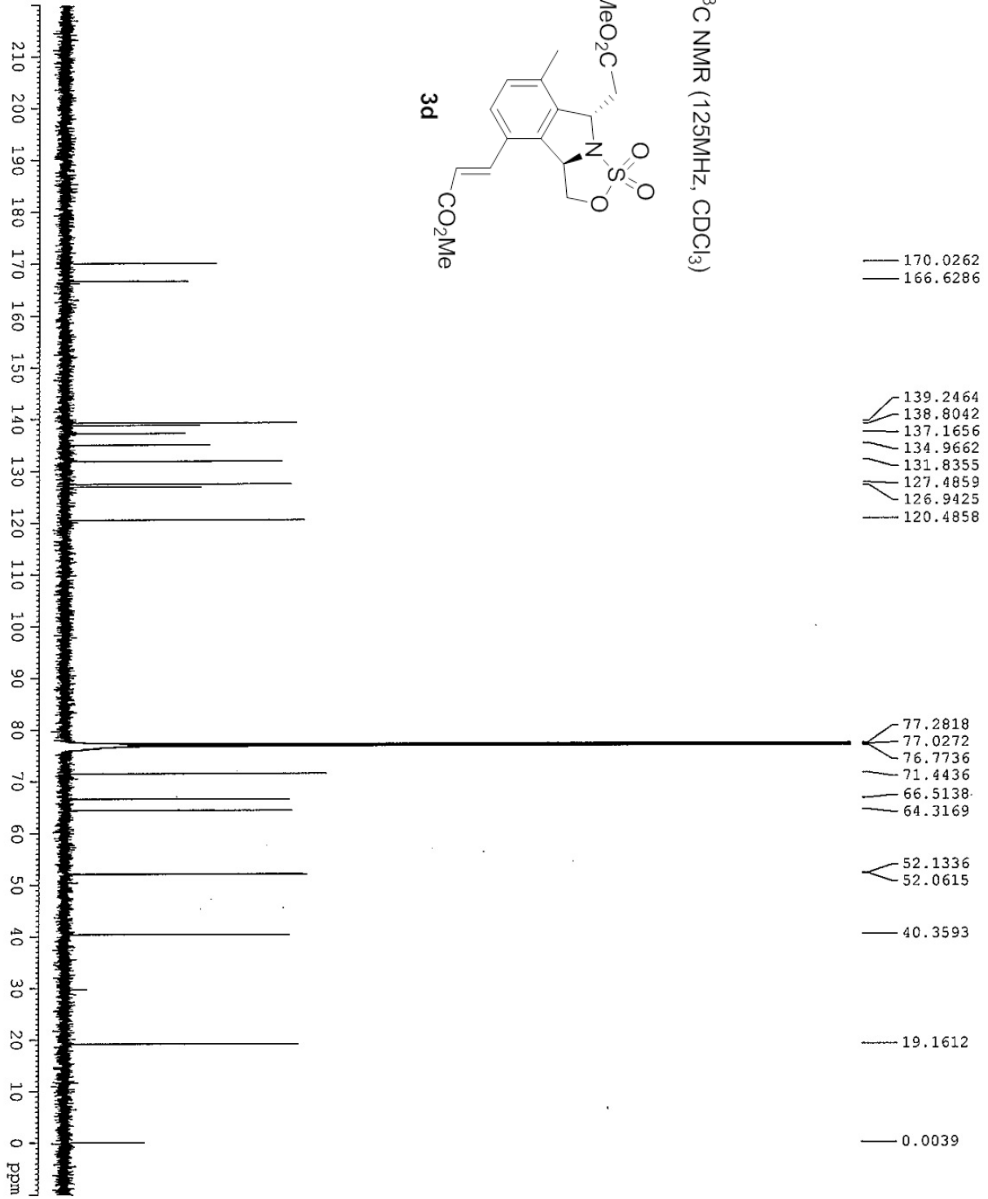

```

NAME          SSM_150331_Me3_CC
EXPNO         1
PROCNO        1
Date_         20150331
Time          19.47
INSTRUM       spect
PROBHD        5 mm DUL 13C-1
PULPROG       zgpg30
TD            299768
SOLVENT       CDCl3
NS            3000
DS            2
SMH           30303.031 Hz
FIDRES        0.924775 Hz
AQ            0.5407385 sec
RG            322.5
DM            16.500 usec
DE            6.00 usec
TE            300.0 K
D1            2.00000000 sec
D11           0.03000000 sec
TDO           1

===== CHANNEL f1 =====
NUC1          13C
P1            8.00 usec
PL1           1.40 dB
PL1W         70.604393001 W
SFO1         125.7703661 MHz

===== CHANNEL f2 =====
CPDPRG2      waltz16
NUC2          1H
PCPD2        100.00 usec
PL2          -1.90 dB
PL12         16.00 dB
PL13         19.00 dB
PL1W         27.23316002 W
PL2W         0.44167015 W
PL13W        0.22135943 W
SFO2         500.1320005 MHz
SI           32768
SF           125.7577890 MHz
WDW          EM
SSB          0
LB           1.00 Hz
GB           0
PC           1.40
  
```

- 2D-NOESY of 3d

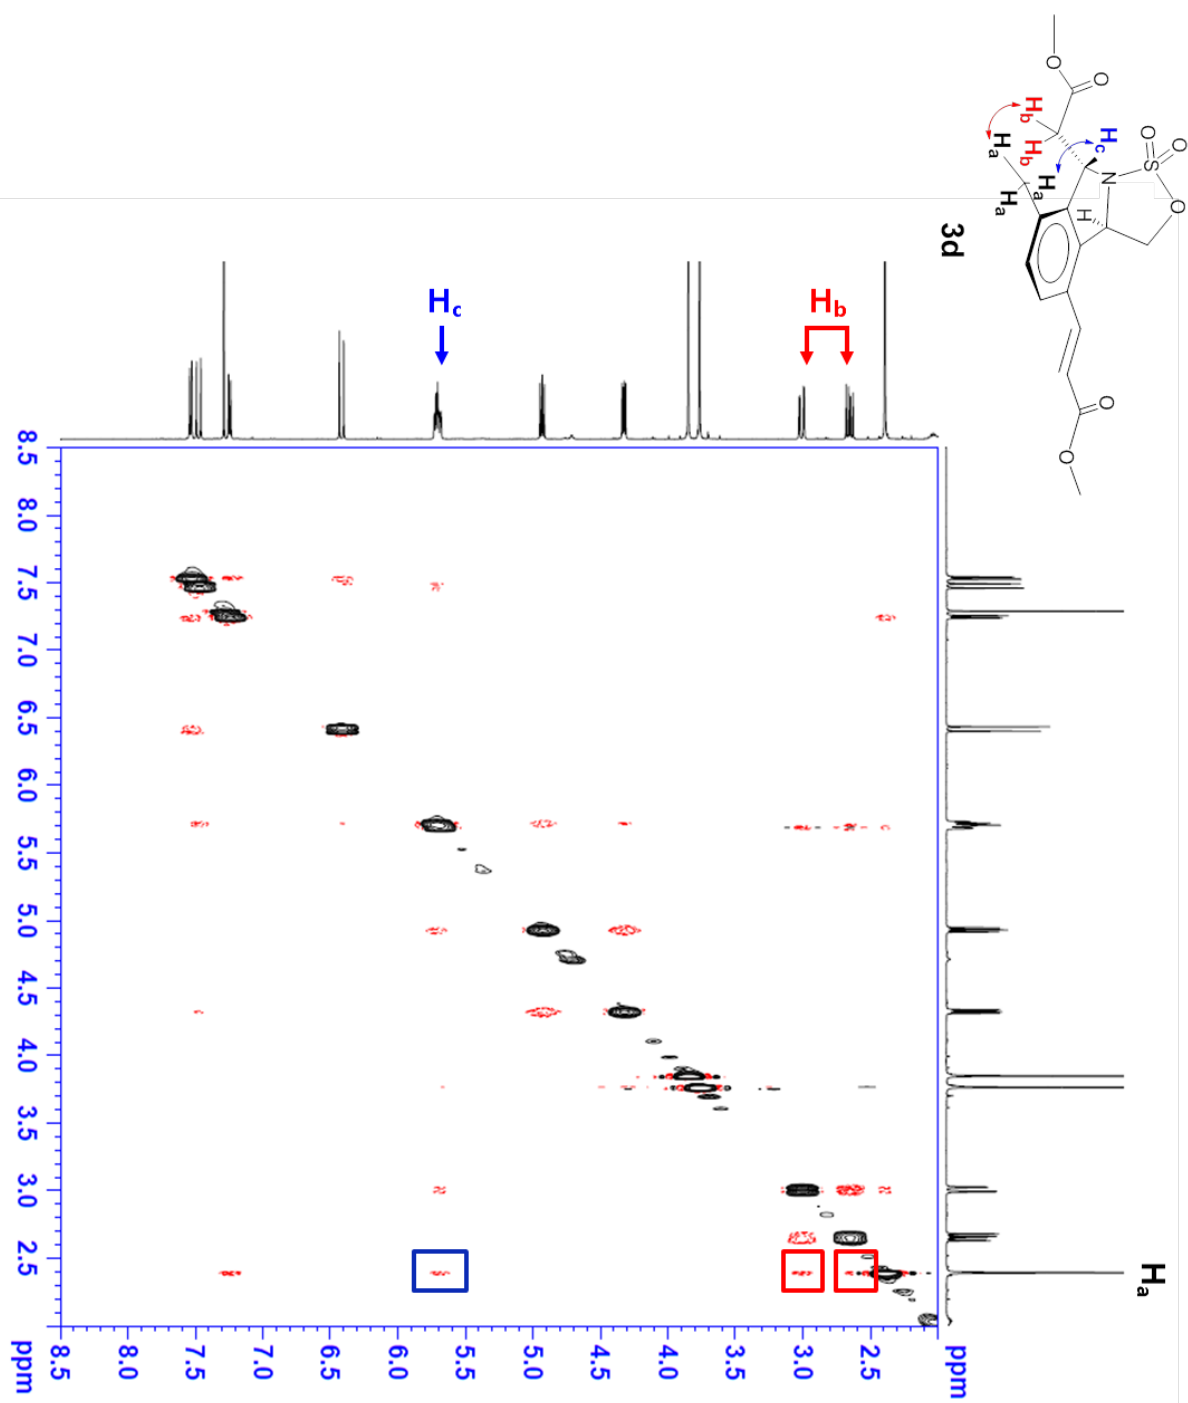

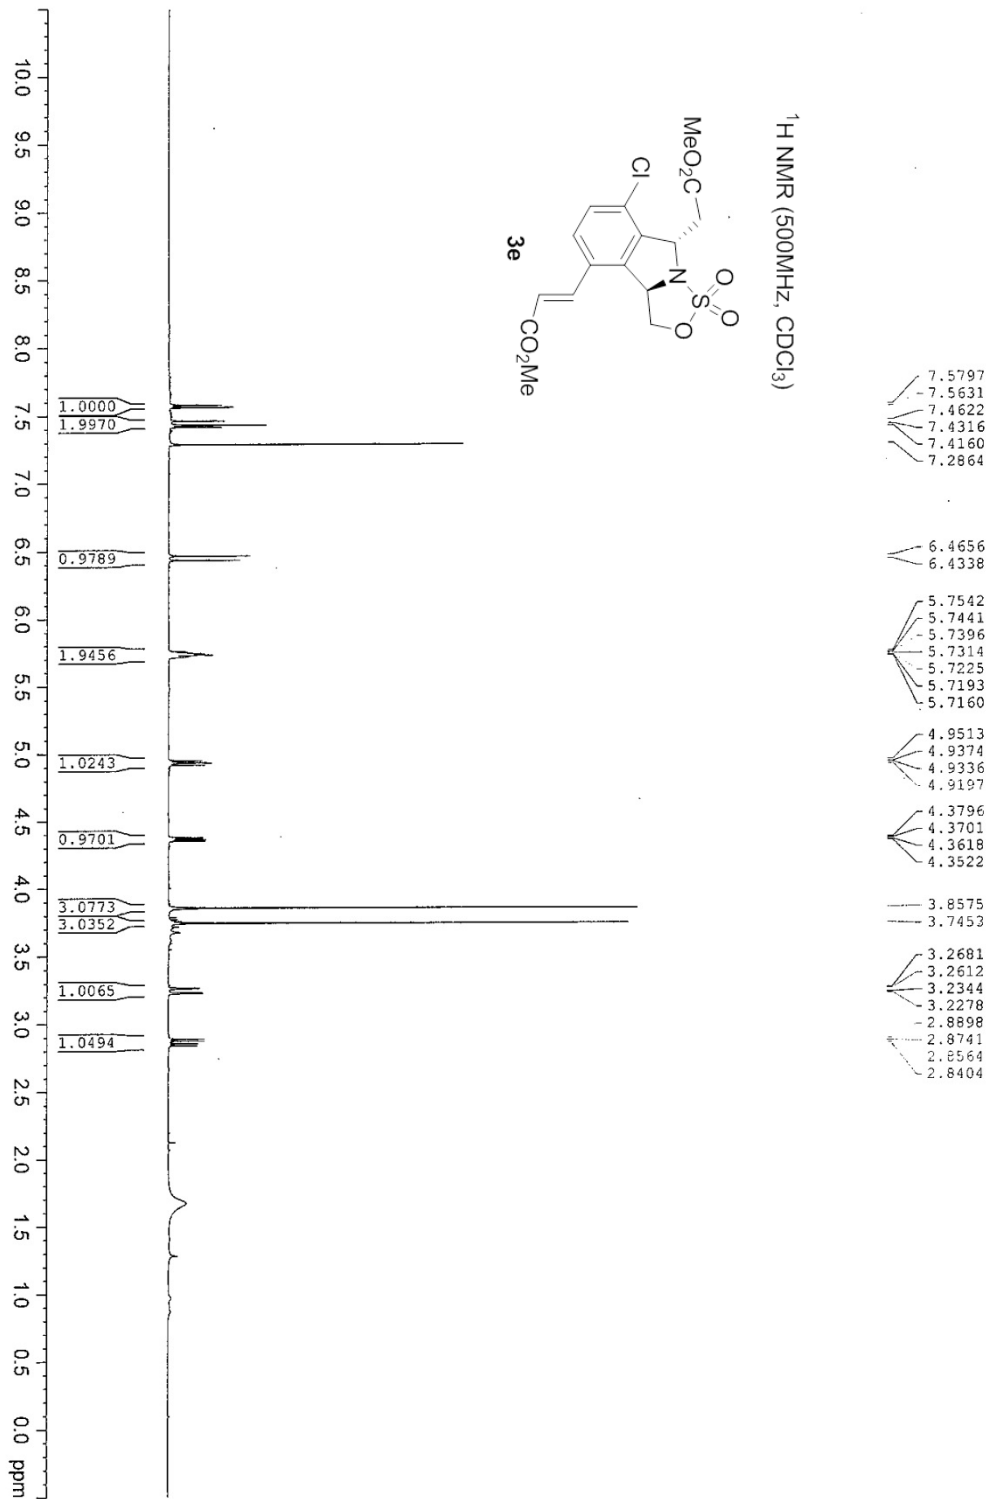

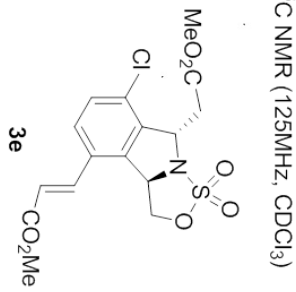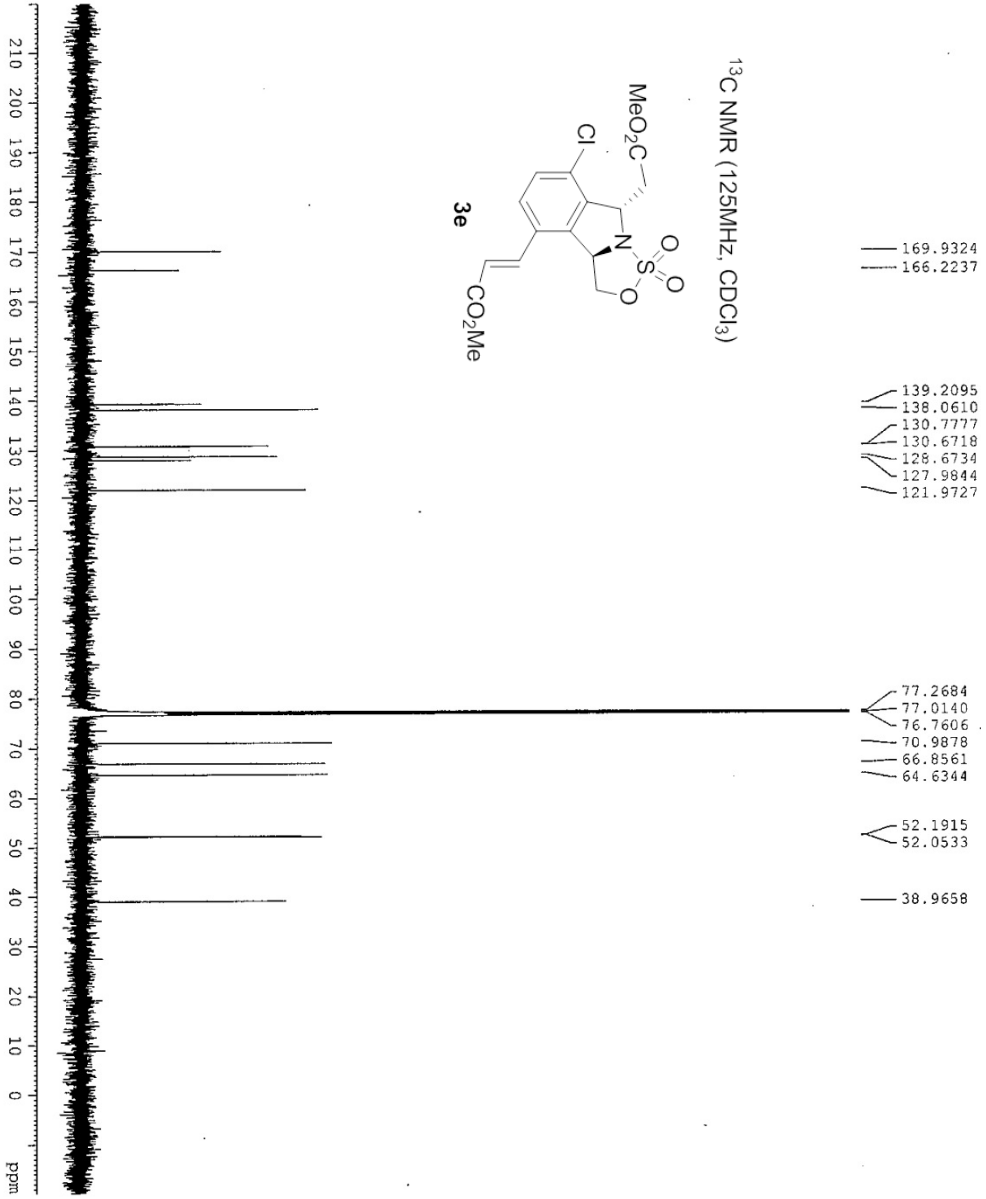

```

NAME SSM_150729_3C1_CC
EXPNO 1
PROCNO 1
Date_ 20150729
Time 20.42
INSTRUM spect
PROBHD 5 mm DUL-13C-1
PULPROG zgpg30
TD 32768
SOLVENT CDCl3
NS 3000
DS 2
SWH 30303.031 Hz
FIDRES 0.924775 Hz
AQ 0.5407385 sec
RG 161.3
DE 16.500 usec
DM 6.00 usec
TE 298.9 K
D1 2.00000000 sec
D11 0.03000000 sec
TD0 1

===== CHANNEL f1 =====
NUC1 13C
P1 8.00 usec
PL1 1.40 dB
PL1W 70.60439301 W
SFO1 125.7703661 MHz

===== CHANNEL f2 =====
CPDPRG2 waltz16
NUC2 1H
PCPD2 100.00 usec
PL2 1.80 dB
PL12 16.00 dB
PL13 19.00 dB
PL1W 27.23316002 W
PL2W 0.44167015 W
PL13W 0.22135943 W
SFO2 500.1320005 MHz
SI 32768
SF 125.7577890 MHz
WDW EM
SSB 0
LB 1.00 Hz
GB 0
PC 1.40
  
```

- 2D-NOESY of 3e

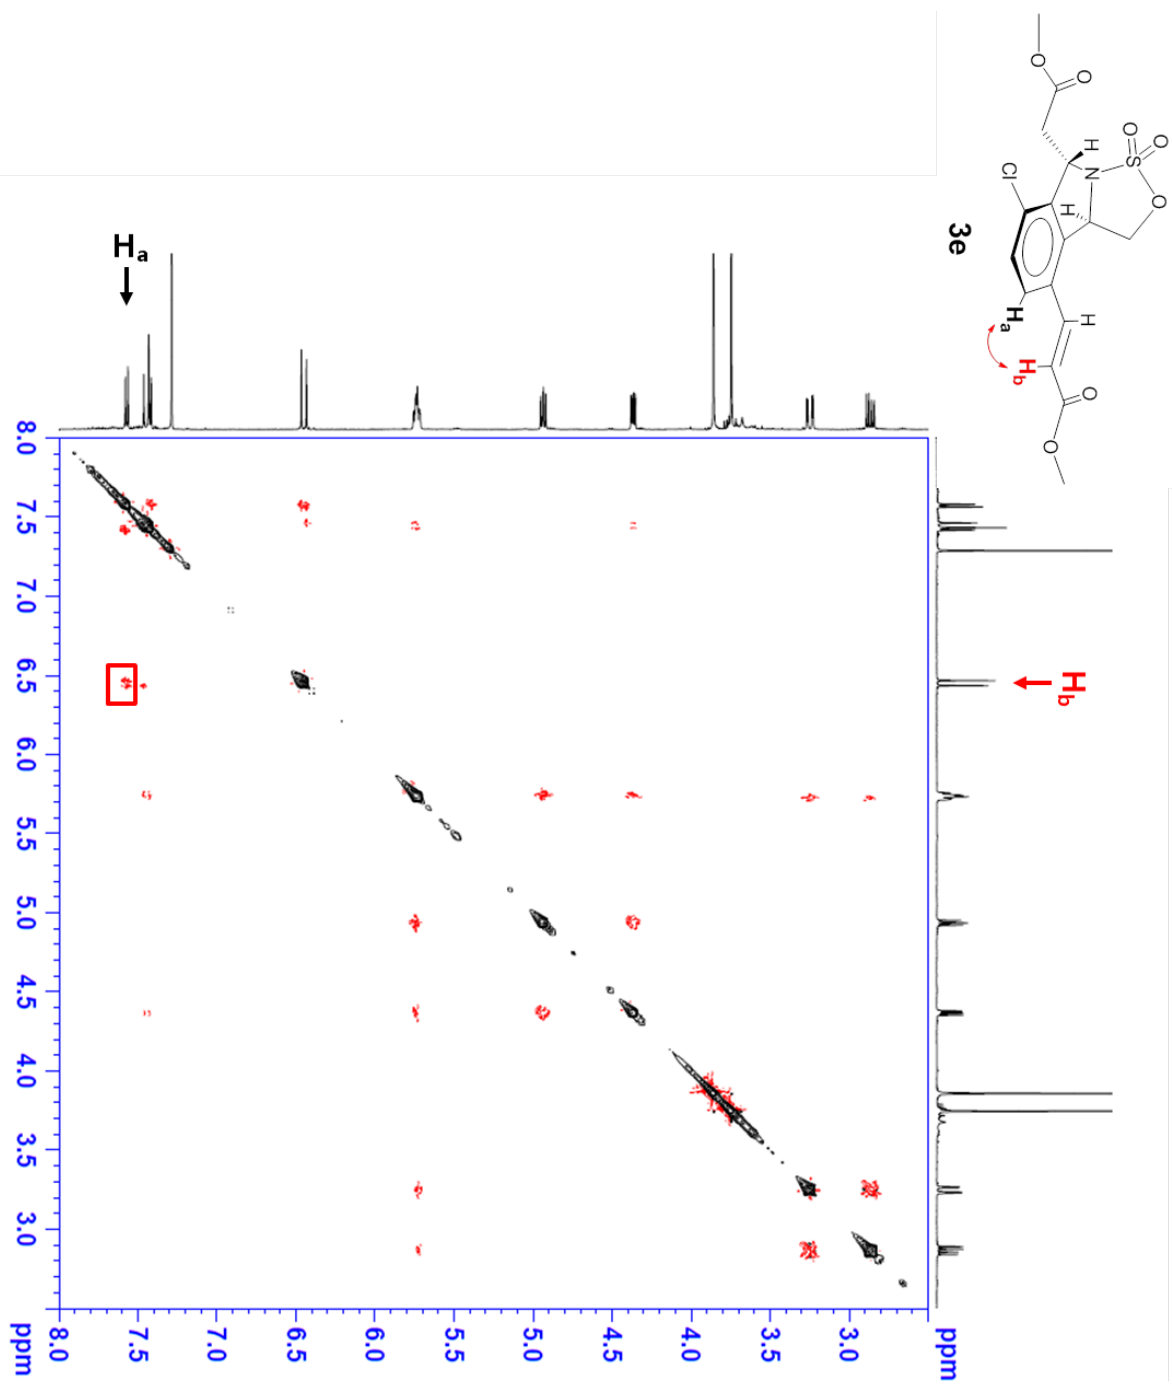

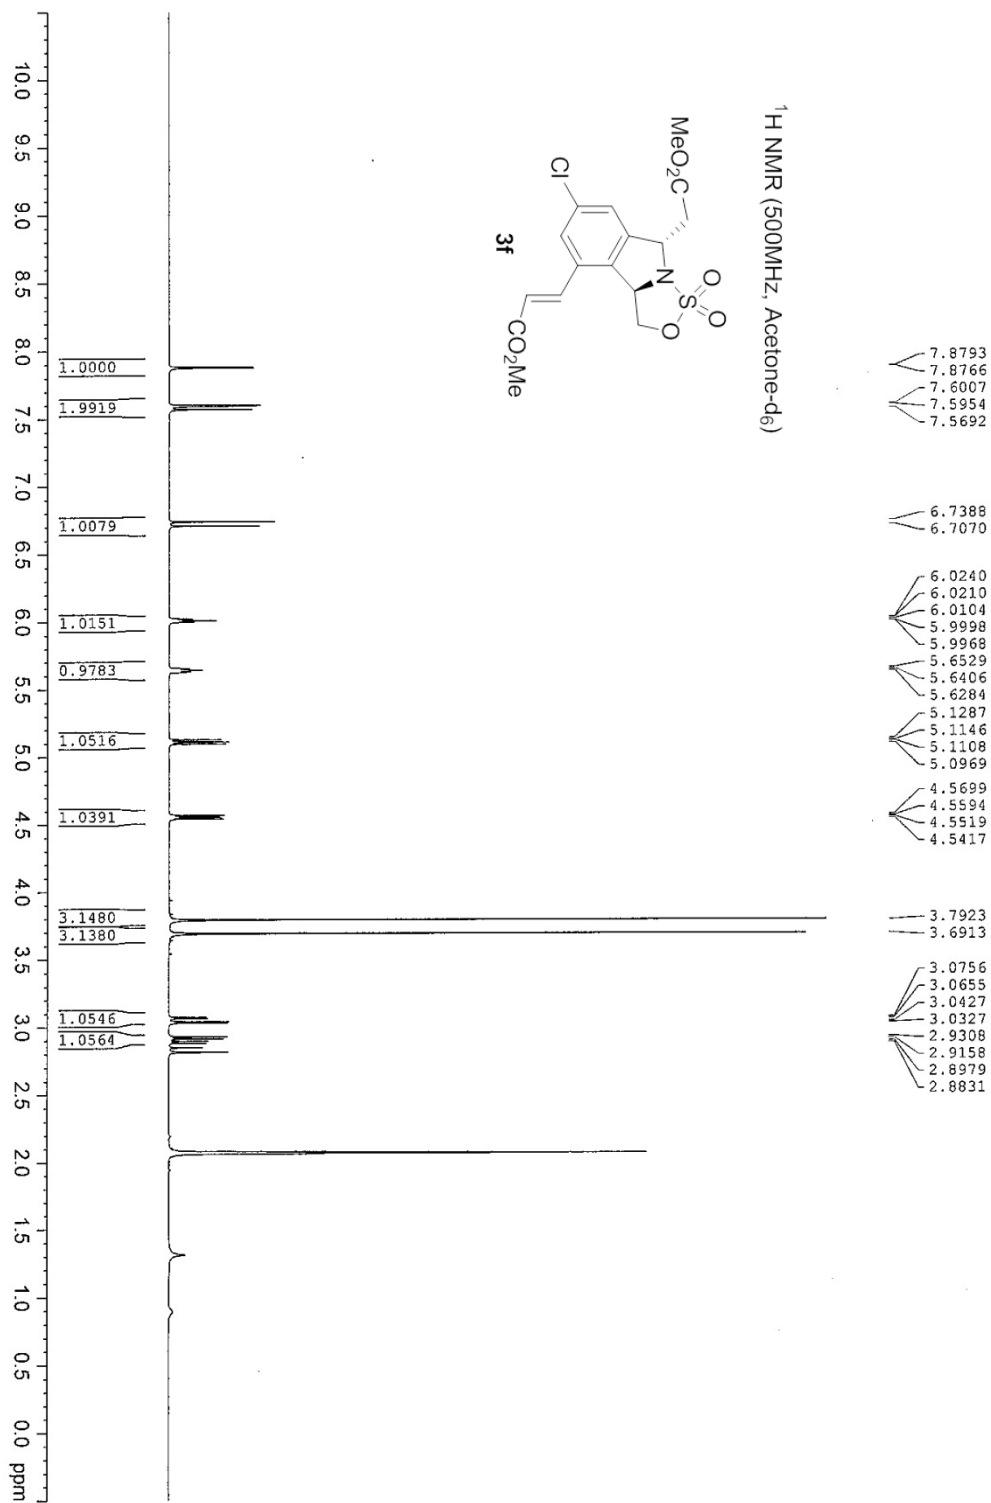

- 169.9151
- 166.0763
- 142.3050
- 137.7659
- 136.3548
- 134.9911
- 130.7247
- 126.9795
- 124.5636
- 122.8371
- 77.3234
- 77.0696
- 76.8147
- 71.8050
- 65.6023
- 64.2453
- 52.2480
- 52.1405
- 41.5359

<sup>13</sup>C NMR (125MHz, Acetone-d<sub>6</sub>)

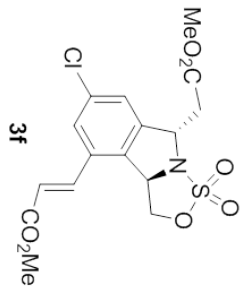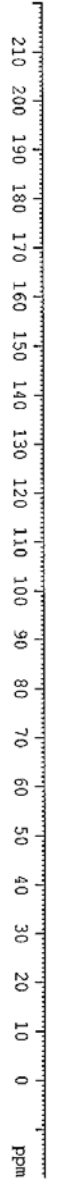

```

NAME          SSM_160113_4c1_cc
EXPNO         1
PROCNO        1
Date_         20160114
Time          6.40
INSTRUM       5 mm DUL 13C-1
PROBHD        zgpg30
PULPROG       32768
TD            CDC13
SOLVENT       5000
NS            2
DS            30303.031 Hz
SMH           0.924775 Hz
FIDRES        0.5407385 sec
AQ            161.3
RG            16.500 usec
DE            6.00 usec
TE            297.7 K
D1            2.00000000 sec
D11           0.03000000 sec
TD0           1

===== CHANNEL f1 =====
NUC1          13C
P1            8.00 usec
PL1           1.40 dB
P1L1W        70.60439301 W
SFO1         125.7703661 MHz

===== CHANNEL f2 =====
CPOPRG2      waltz16
NUC2          1H
PCPD2        100.00 usec
PL2          -1.90 dB
PL12         16.00 dB
PL13         19.00 dB
PL2W         27.23316002 W
PL12W        0.44167015 W
PL13W        0.22135943 W
SFO2         500.1320005 MHz
SI           32768
SF           125.7577890 MHz
MDW          EM
SSB          0
LB           1.00 Hz
GB           0
PC           1.40
  
```



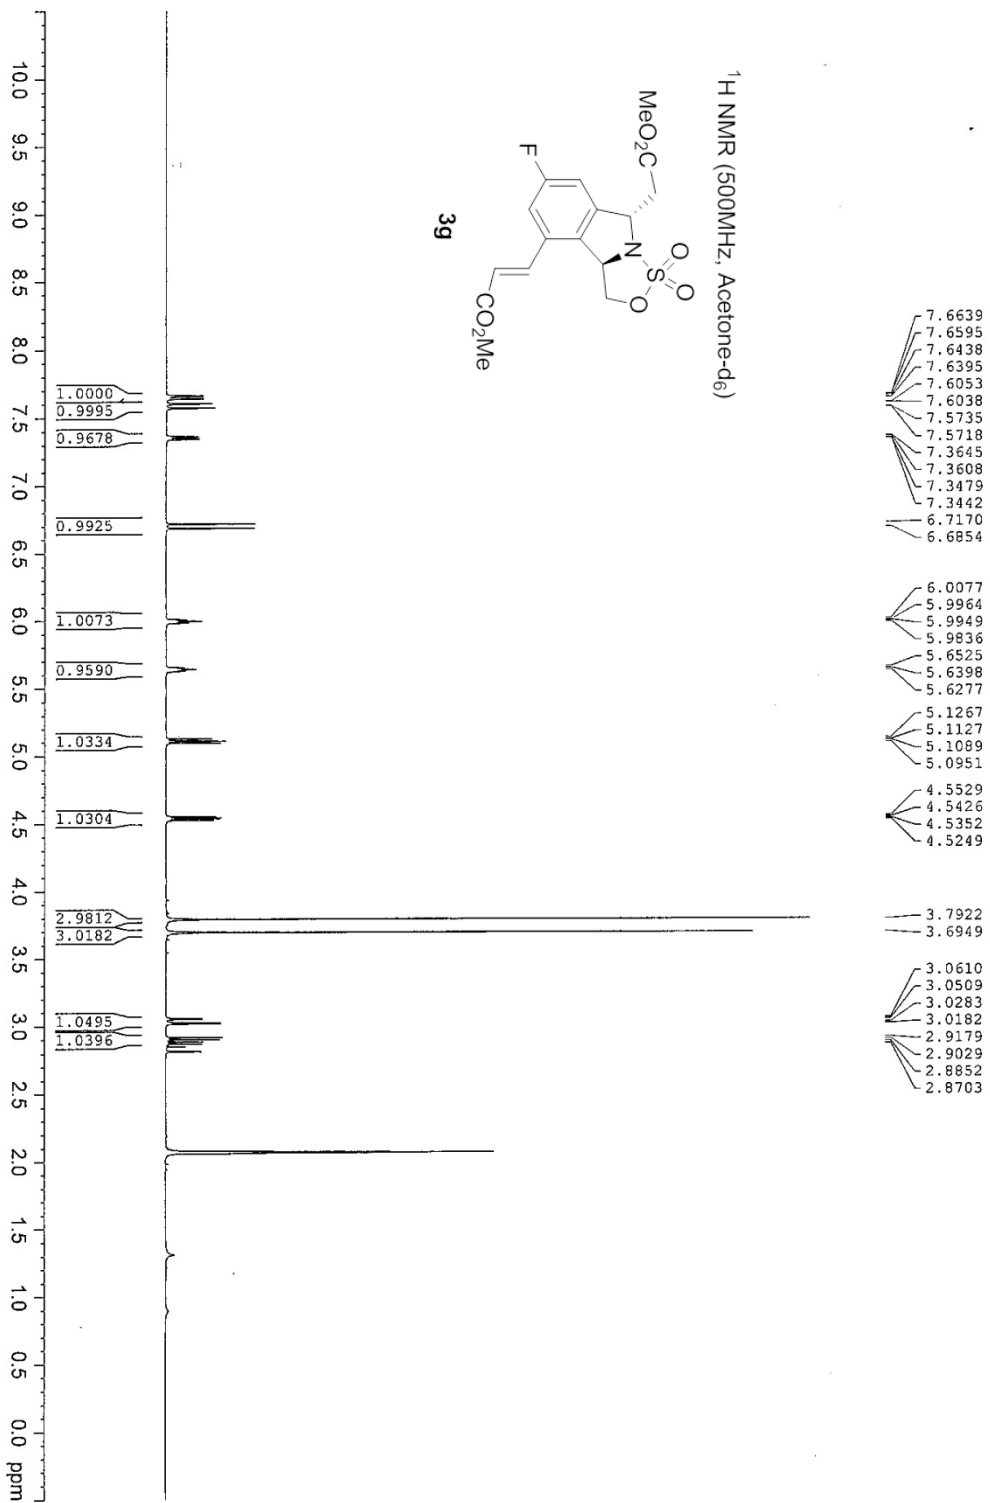

169.9198  
166.0623  
164.8127  
162.8261  
  
142.7781  
142.7088  
137.8782  
137.8634  
132.2302  
132.2138  
131.1039  
131.0347  
122.8023  
113.9274  
113.7365  
112.1242  
111.9293

72.0469  
65.4451  
64.2911  
64.2733  
  
52.2451  
52.1479  
  
41.5987

<sup>13</sup>C NMR (125MHz, Acetone-d<sub>6</sub>)

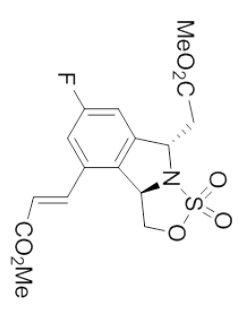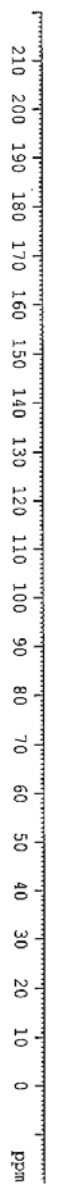

```

NAME          SSM_160113_4F_cc
EXPNO         1
PROCNO        1
Date_         20160114
Time_         2.57
INSTRUM       spect
PROBHD        5 mm DUL 13C-1
PULPROG       zgpg30
TD            32768
SOLVENT       CDCl3
NS            5000
DS            2
SWH           30303.031 Hz
FIDRES        0.924775 Hz
AQ            0.5407385 sec
RG            161.3
DW            16.500 usec
DE            6.00 usec
TE            297.9 K
D1            2.00000000 sec
D11           0.03000000 sec
TD0           1

===== CHANNEL F1 =====
NUC1          13C
P1            8.00 usec
PL1           1.40 dB
PL1W          70.60439301 W
SFO1          125.7703661 MHz

===== CHANNEL F2 =====
CDDPRG2      waltz16
NUC2          1H
PCPD2        100.00 usec
P2           -1.90 dB
PL12         16.00 dB
PL13         19.00 dB
PL1W         27.23316002 W
PL12W        0.44167015 W
PL13W        0.22135943 W
SFO2         500.1320005 MHz
SI           32768
SF           125.7577890 MHz
WDW          EM
SSB          0
LB           1.00 Hz
GB           0
PC           1.40
  
```

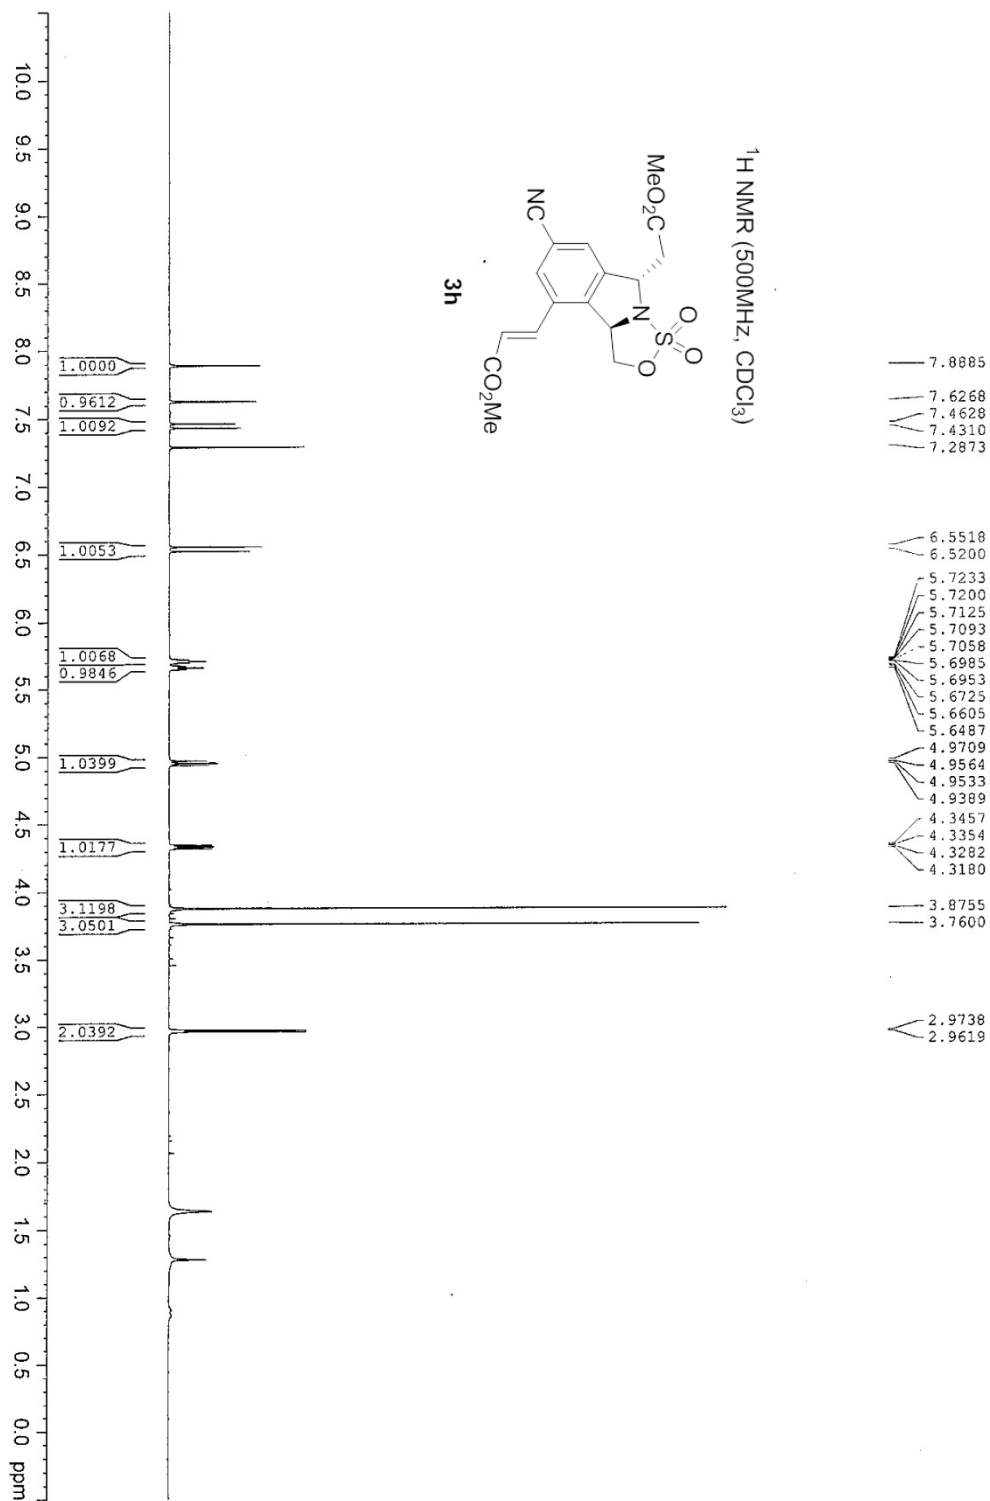

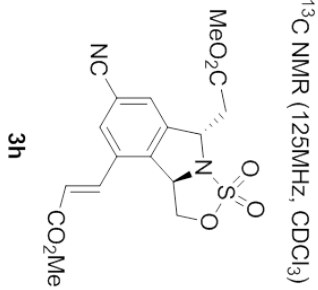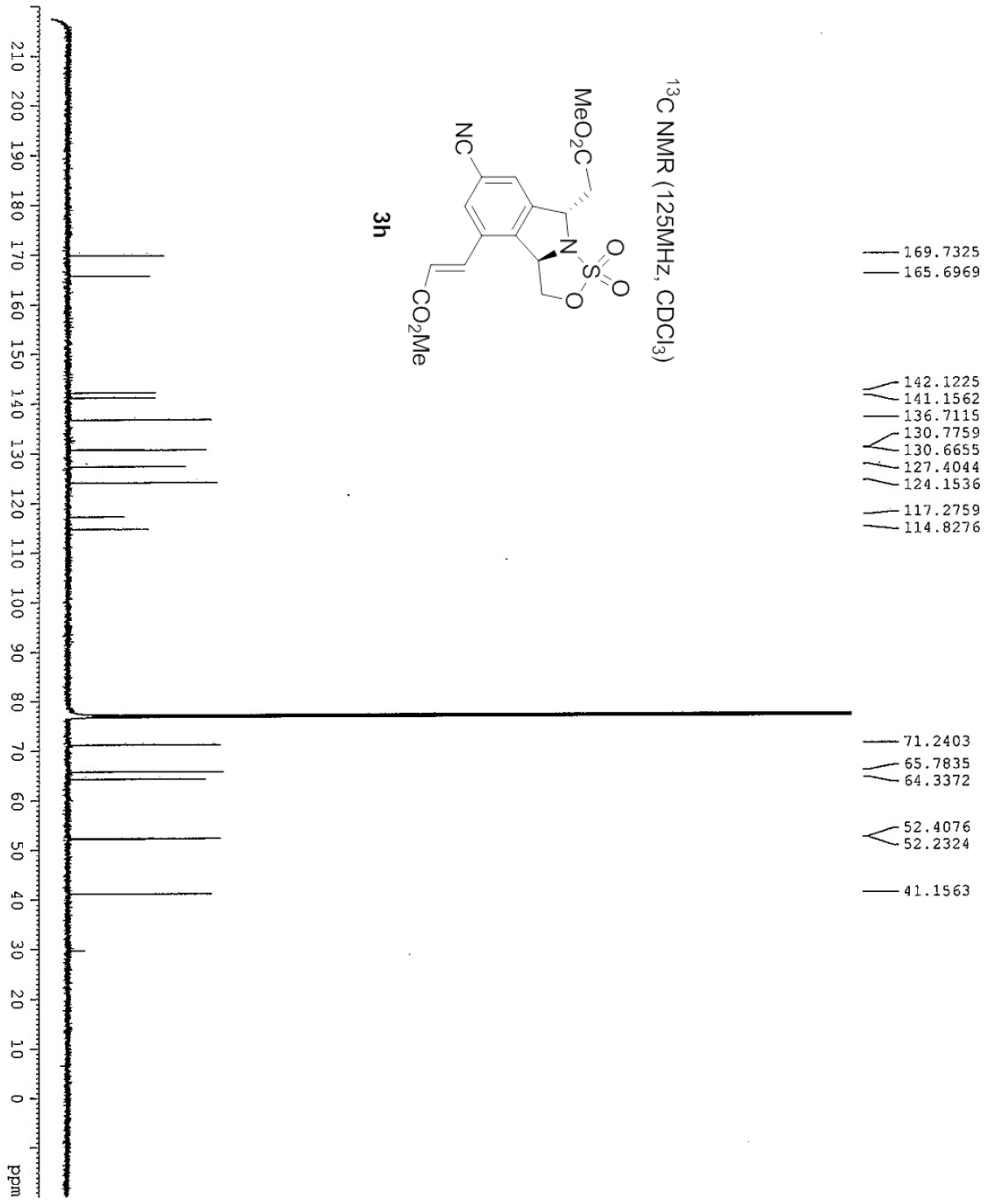

```

NAME          SSM_150820_CN_CC
EXPNO         1
PROCNO        1
Date_         20150821
Time_         0.10
INSTRUM       spect
PROBHD        5 mm DUL 13C-1
PULPROG       zgpg30
TD            32768
SOLVENT       CDCl3
NS            3000
DS            2
SWH           30303.031 Hz
FIDRES       0.924775 Hz
AQ           0.5407385 sec
RG           161.3
DE           16.500 usec
TE           298.5 K
D1           2.00000000 sec
D11          0.03000000 sec
TD0          1

===== CHANNEL f1 =====
NUC1          13C
P1           8.00 usec
PL1          1.40 dB
EL1W         70.60439301 W
SFO1         125.7703661 MHz

===== CHANNEL f2 =====
CPDPRG2      waltz16
NUC2          1H
PCPD2        100.00 usec
PL2          -1.90 dB
PL12         16.00 dB
PL13         19.00 dB
PL14         27.23316002 W
PL15         0.44167015 W
PL16         0.22135943 W
PL17         500.1320005 MHz
SFO2         32768
SF           125.7577890 MHz
WDW          EM
SSB          0 Hz
GB          1.00 Hz
PC          0
  
```

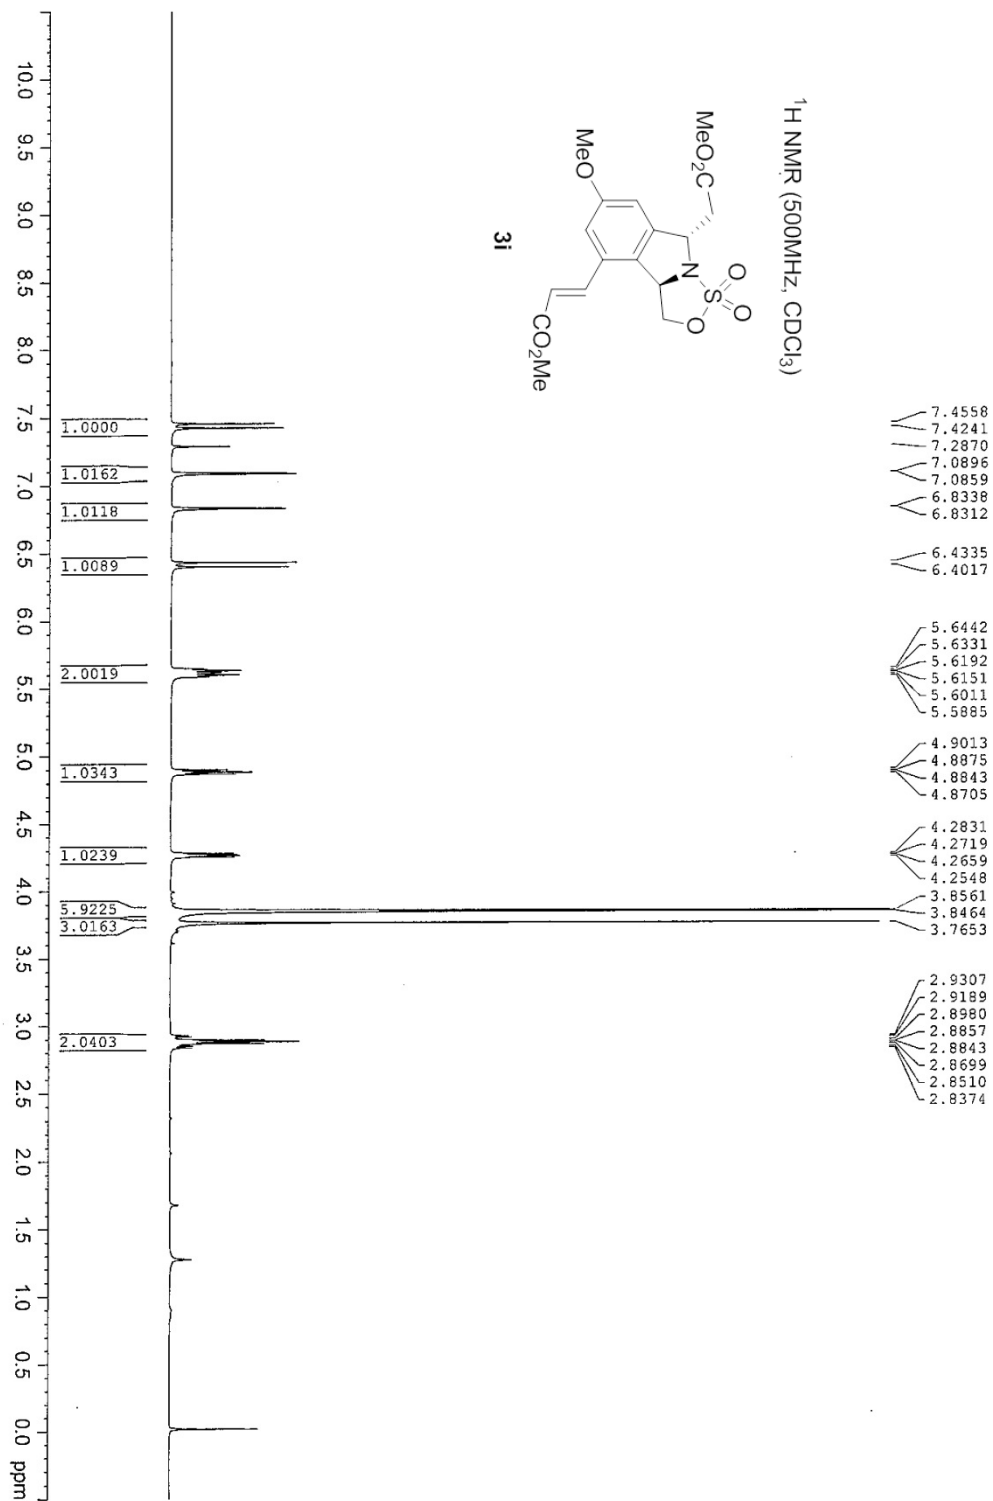

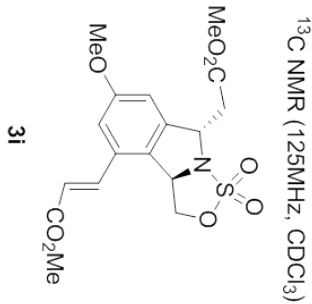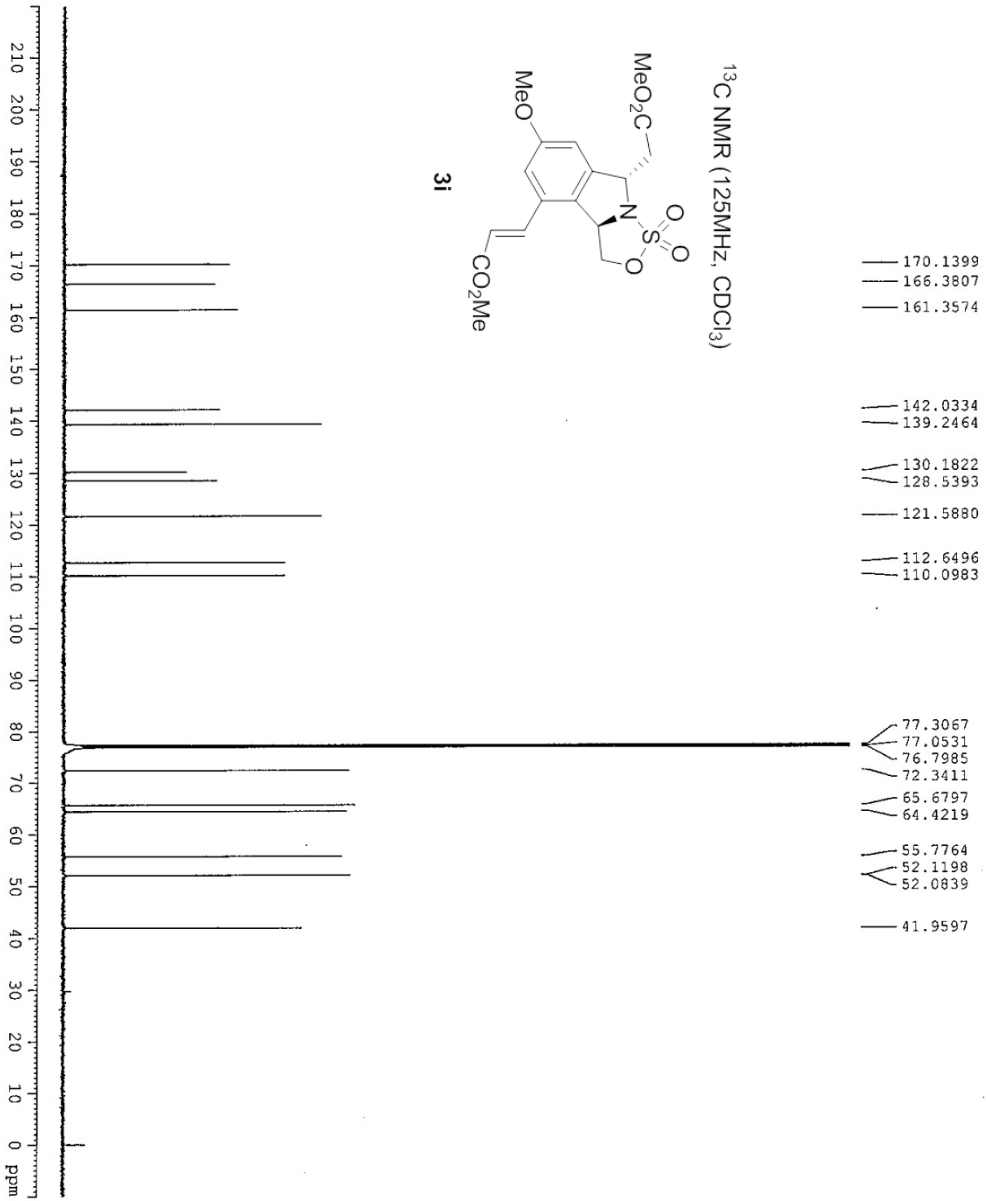

```

NAME          SSM_150410_0Mw_CC
EXPNO         1
PROCNO       20150413
Date_        0.35
Time_
INSTRUM      spect
PROBHD       5 mm DUL 13C-1
PULPROG      zgpg30
TD           32768
SOLVENT      CDCl3
NS           3000
DS           2
SMH          30303.031 Hz
FIDRES      0.924775 Hz
AQ          0.5407385 sec
RG          322.5
DE          16.500 usec
TE          296.3 K
D1          2.00000000 sec
D11         0.03000000 sec
TD0         1

===== CHANNEL F1 =====
NUC1         13C
P1          8.00 usec
PL1         1.40 dB
PL1W        70.60433901 W
SFO1        125.7703661 MHz

===== CHANNEL F2 =====
CPDPRG2     waltz16
NUC2         1H
PCPD2       100.00 usec
PL2         -1.90 dB
PL12        16.00 dB
PL13        19.00 dB
PL1W        27.233316002 W
PL2W        0.44167015 W
PL13W       0.22135943 W
SFO2        500.1320005 MHz
SI          32768
SF          125.7577890 MHz
WDW         EM
SSB         0
LB          1.00 Hz
GB          0
PC          1.40
  
```

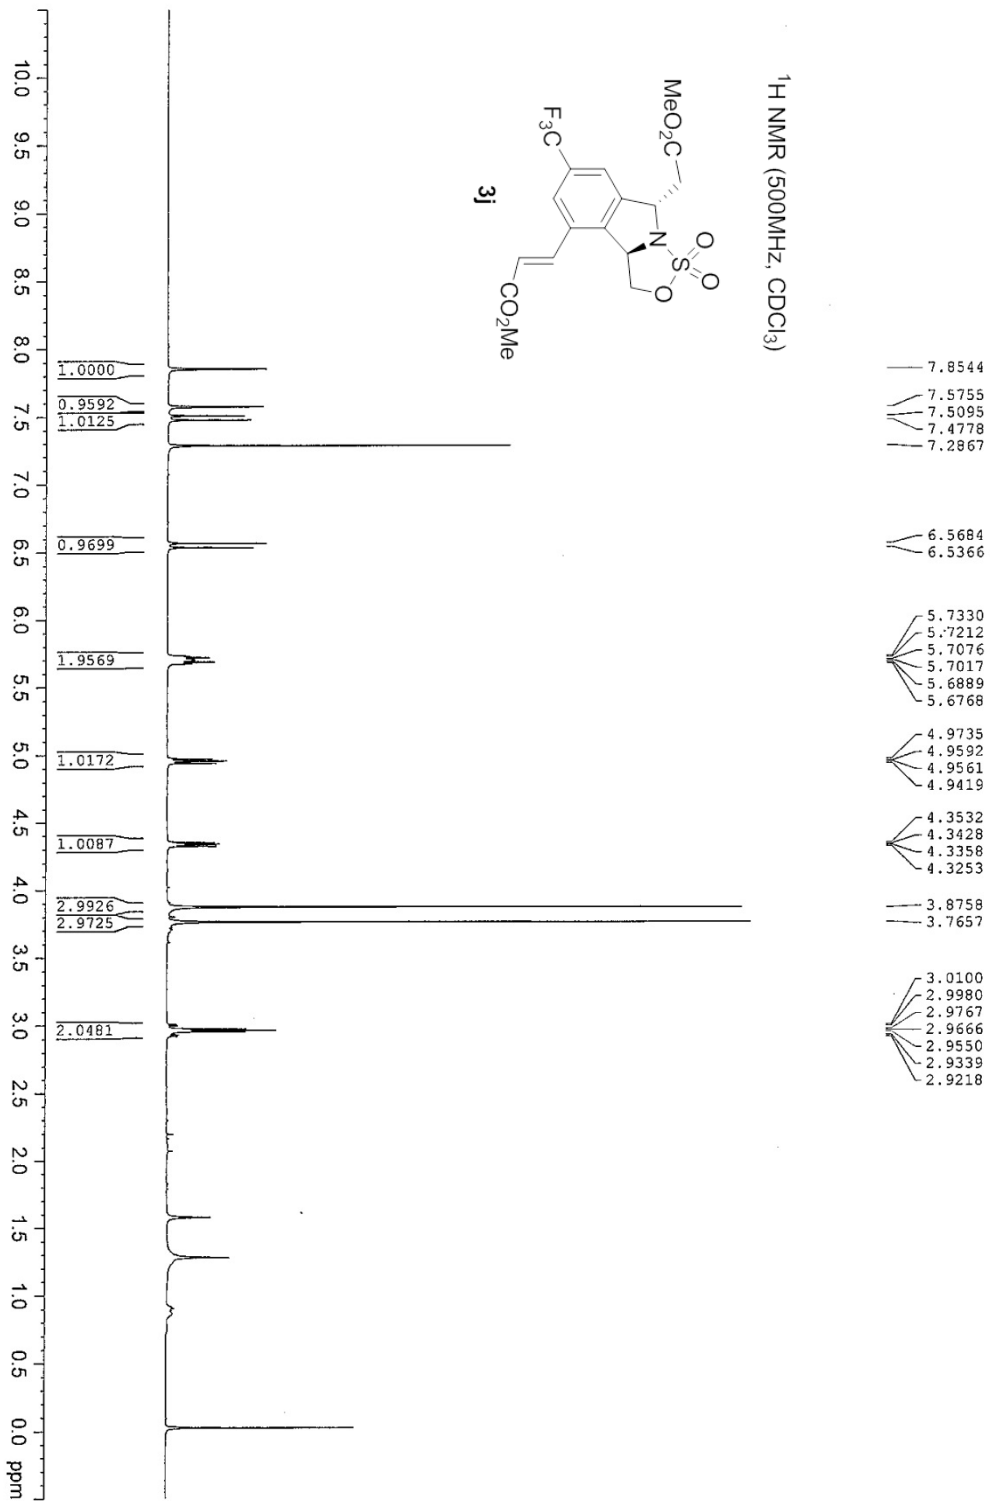

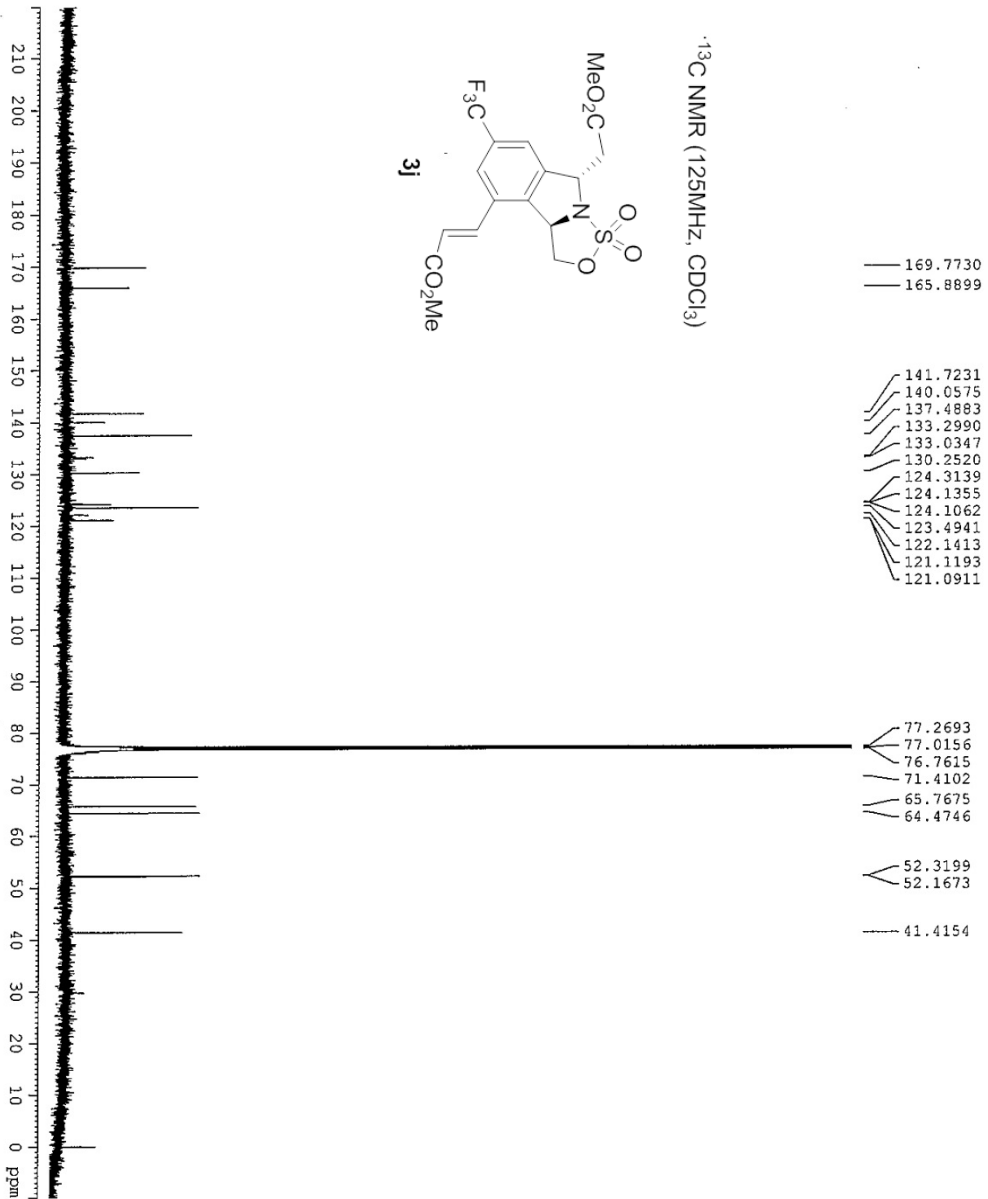

```

NAME          SSN_150407_CF3_CC
EXPNO         1
PROCNO        1
Date_         20150408
Time          5.57
INSTRUM       5 mm DUL 13C-1
PROBHD        zppc30
PULPROG       zgpg30
TD            32768
SOLVENT       CDCl3
NS            3000
DS            2
SWH           30303.031 Hz
FIDRES       0.924775 Hz
AQ           0.5407385 sec
RG           161.3
DE           16.500 usec
TE           298.1 K
D1           2.00000000 sec
D11          0.03000000 sec
TD0          1

===== CHANNEL f1 =====
NUC1          13C
P1           8.00 usec
PL1          1.40 dB
PL1W         70.60439301 W
SFO1         125.7703661 MHz

===== CHANNEL f2 =====
CPDPRG2      waltz16
NUC2         1H
PCPD2        100.00 usec
PL2          -1.90 dB
PL12         16.00 dB
PL13         19.00 dB
PL1W         27.23316002 W
PL12W        0.44167015 W
PL13W        0.22135943 W
SFO2         500.1320005 MHz
SI           32768
SF           125.7577890 MHz
WDW          EM
SSB          0
LB           1.00 Hz
GB           0
PC           1.40

```



<sup>1</sup>H NMR (500MHz, CDCl<sub>3</sub>)

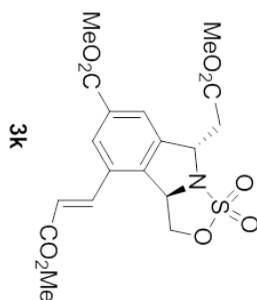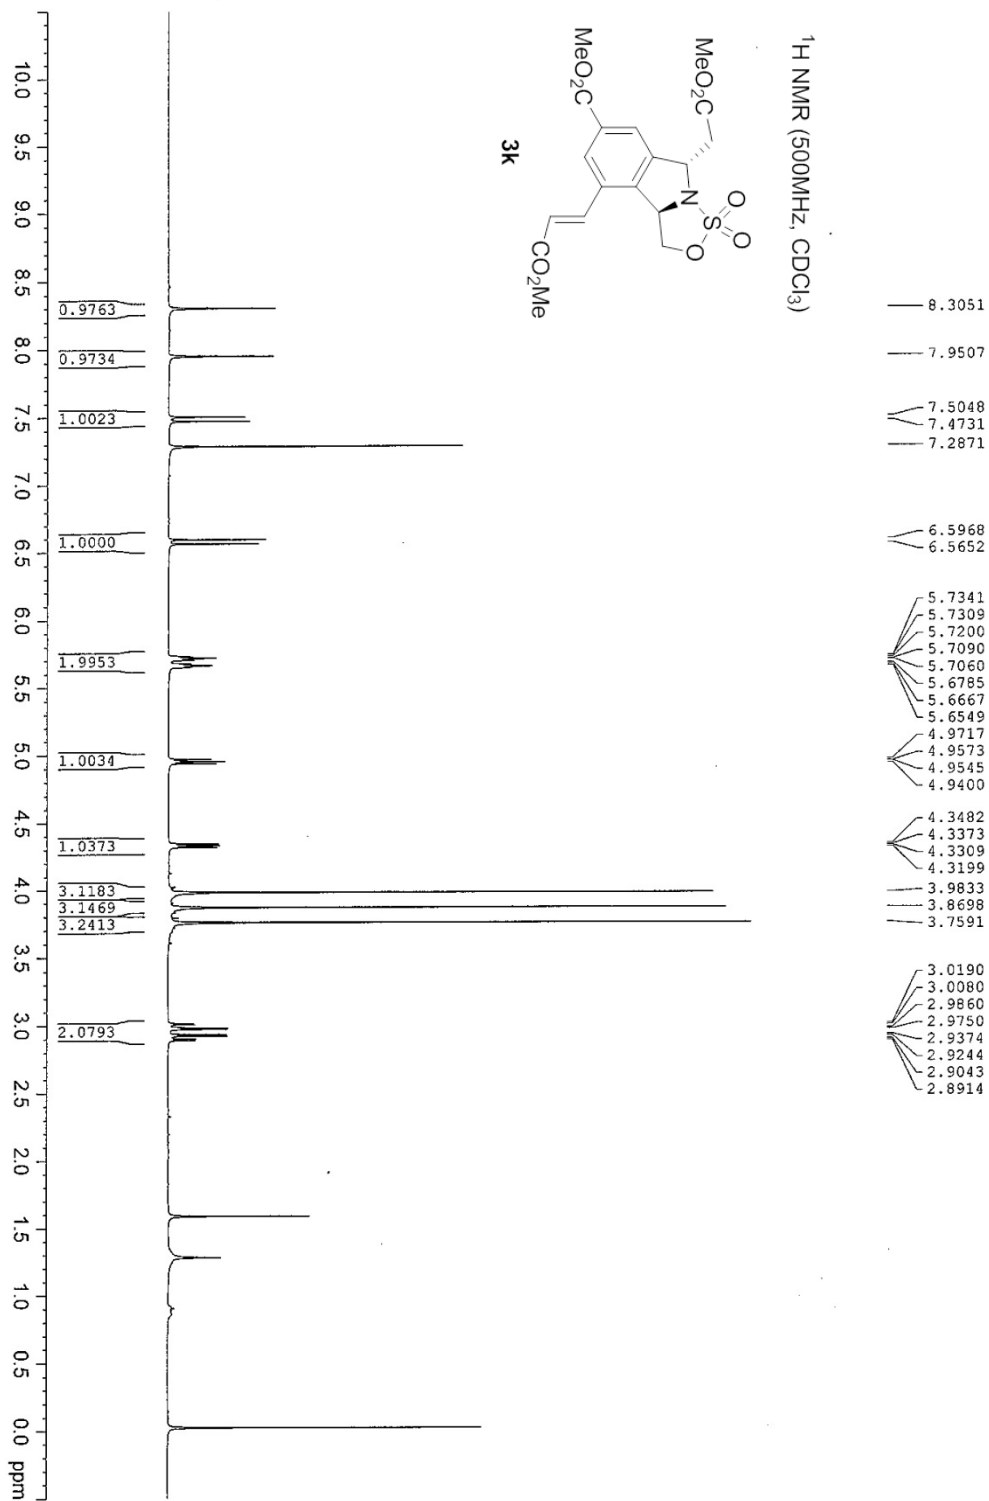

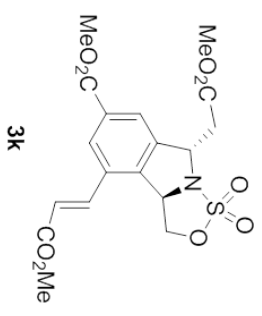

<sup>13</sup>C NMR (125MHz, CDCl<sub>3</sub>)

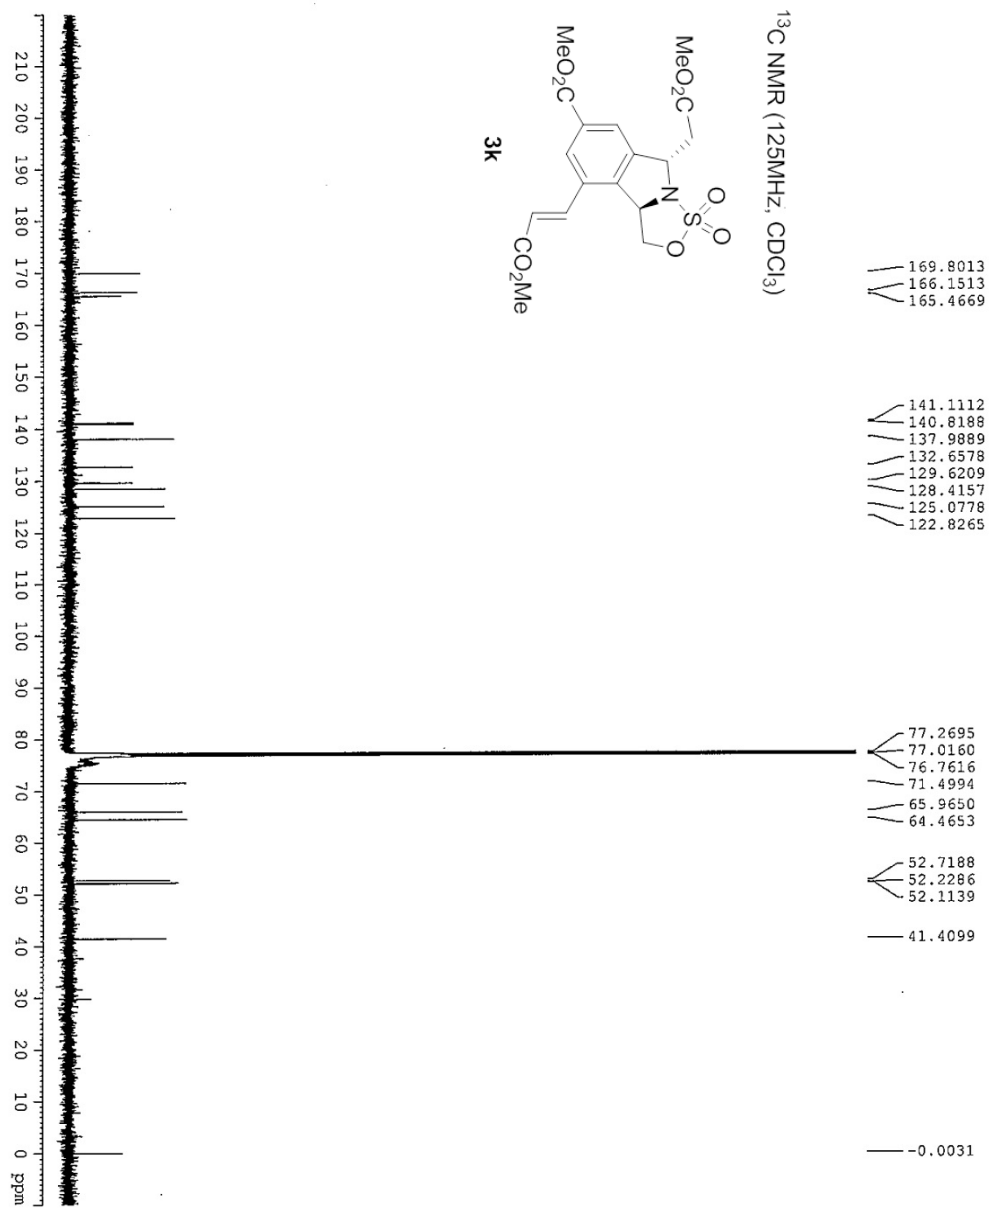

- 169.8013
- 166.1513
- 165.4669
- 141.1112
- 140.8188
- 137.9889
- 132.6578
- 129.6209
- 128.4157
- 125.0776
- 122.8265
- 77.2695
- 77.0160
- 76.7616
- 71.4994
- 65.9650
- 64.4653
- 52.7188
- 52.2286
- 52.1139
- 41.4099
- 0.0031

```

NAME          SSM_150407_CO2Me_CC
EXPNO         1
PROCNO        1
Date_         20150408
Time         3.41
INSTRUM       spect
PROBHD        5 mm DUL 13C-1
PULPROG       zgpg30
TD            32768
SOLVENT       CDCl3
NS            3000
DS            2
SWH           30303.031 Hz
FIDRES        0.924775 Hz
AQ            0.5407385 sec
RG            161.3
DE            16.500 usec
DM            6.00 usec
TE            298.2 K
D1            2.00000000 sec
D11           0.03000000 sec
TD0           1

===== CHANNEL f1 =====
NUC1          13C
P1            8.00 usec
PL1           1.00 dB
P1M           70.6043301 W
SFO1          125.7703661 MHz

===== CHANNEL f2 =====
CPDPRG2      waltz16
NUC2          1H
PCPD2        100.00 usec
PL2           -1.90 dB
PL12          16.00 dB
PL13          19.00 dB
PL1Z          27.23316002 W
PL2W          0.44167015 W
PL13W         0.22135943 W
SFO2          500.1320005 MHz
SI            32768
SF            125.7577890 MHz
WDW           EM
SSB           0
LB            1.00 Hz
GB            0
PC            1.40
  
```

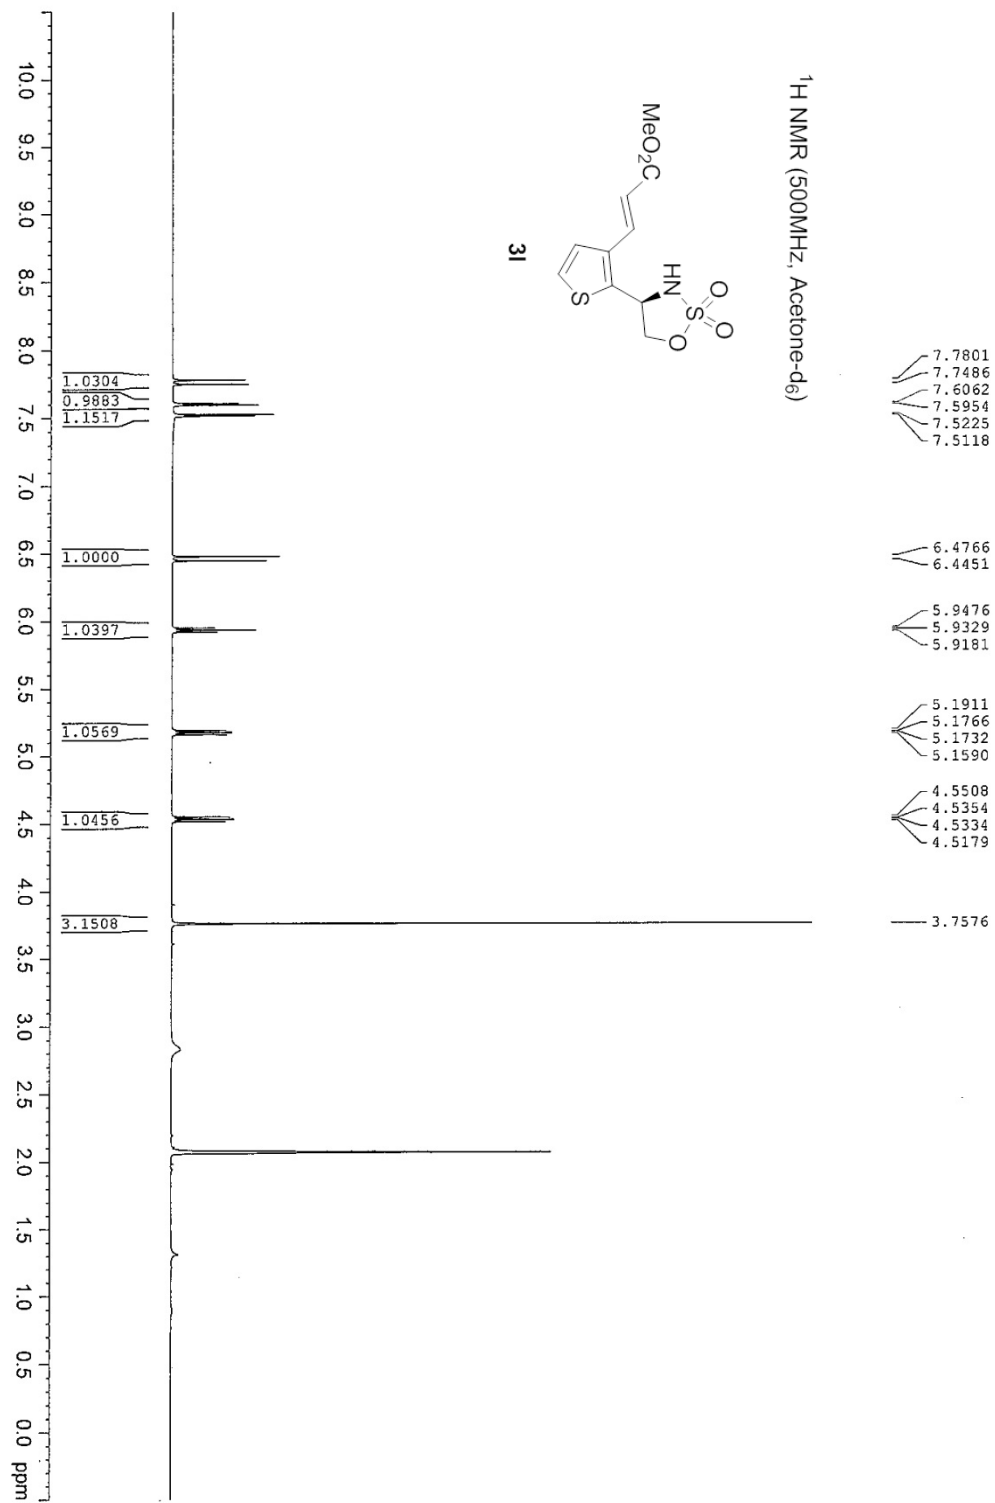

<sup>13</sup>C NMR (125MHz, Acetone-d<sub>6</sub>)

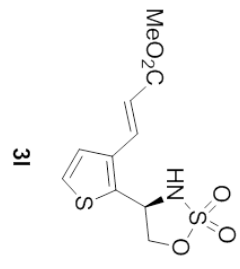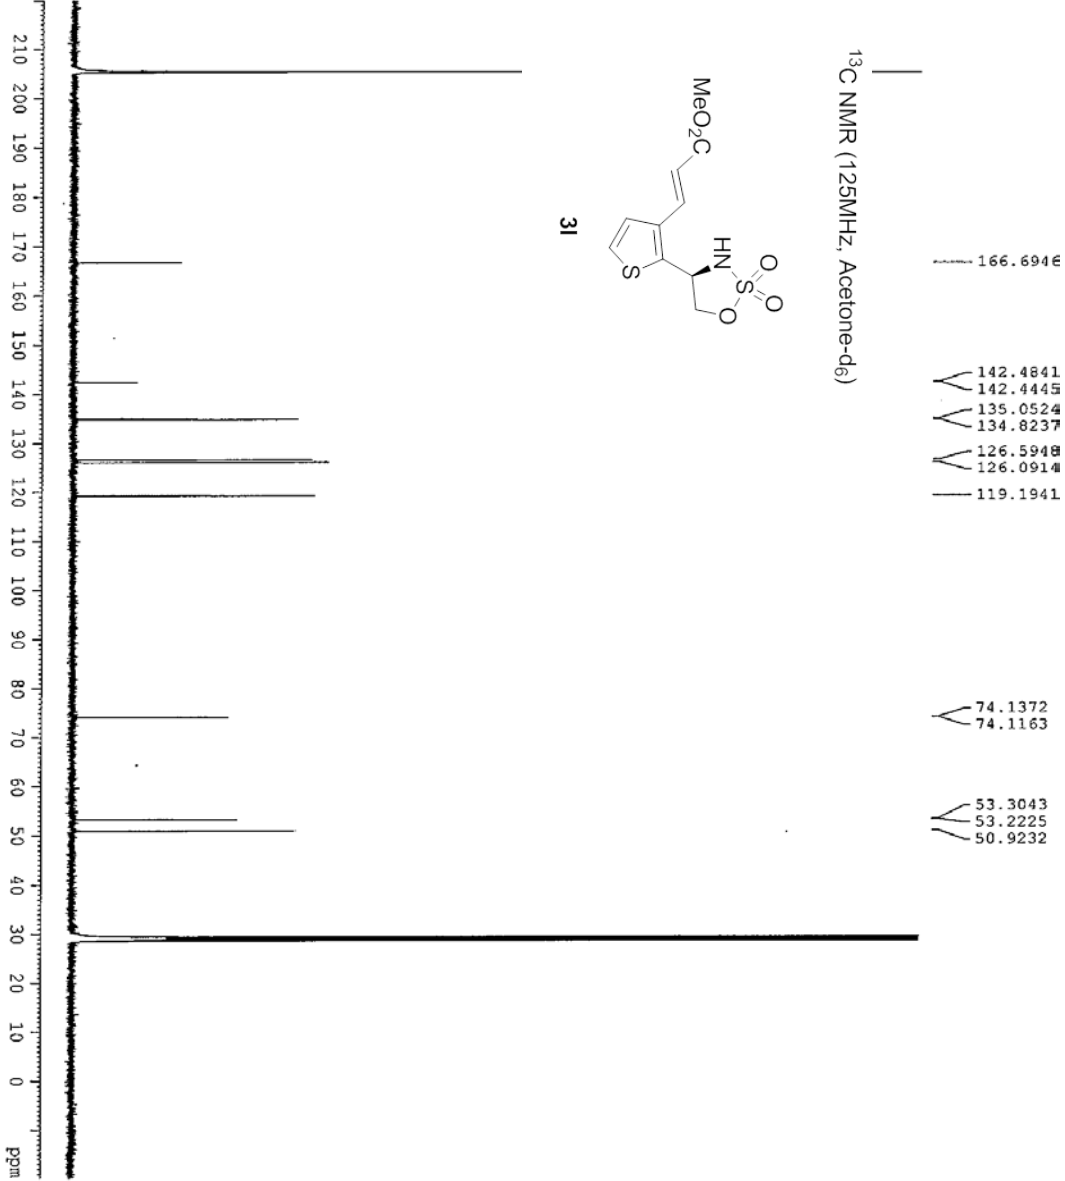

- 166.694
- 142.4841
- 142.4445
- 135.0524
- 134.8237
- 126.5948
- 126.0914
- 119.1941
- 74.1372
- 74.1163
- 53.3043
- 53.2225
- 50.9232

```

NAME: SSM_160113_S_cc
EXPNO: 1
PROCNO: 1
Date_ : 20160113
Time: 23.13
INSTRUM: spect
PROBHD: 5 mm DUL 13C-1
PULPROG: zgpg30
TD: 32768
SOLVENT: Acetone
NS: 5000
DS: 2
SWH: 30303.031 Hz
FIDRES: 0.924775 Hz
AQ: 0.5407385 sec
RG: 574.7
DM: 16.500 usec
DE: 6.00 usec
TE: 298.0 K
D1: 2.00000000 sec
D11: 0.03000000 sec
TDO: 1

===== CHANNEL F1 =====
NUC1: 13C
P1: 8.00 usec
PL1: 1.40 dB
PL1W: 70.60439301 W
SFO1: 125.7703661 MHz

===== CHANNEL F2 =====
CPDPRG2: waltz16
NUC2: 1H
PCPD2: 100.00 usec
PL2: -1.90 dB
PL12: 16.00 dB
PL13: 19.00 dB
PL2W: 27.23316002 W
PL12W: 0.44167013 W
PL13W: 0.22139443 W
SFO2: 500.1320005 MHz
SI: 32768
SF: 125.7577890 MHz
WDW: EM
SSB: 0
GB: 0
PC: 1.40
  
```

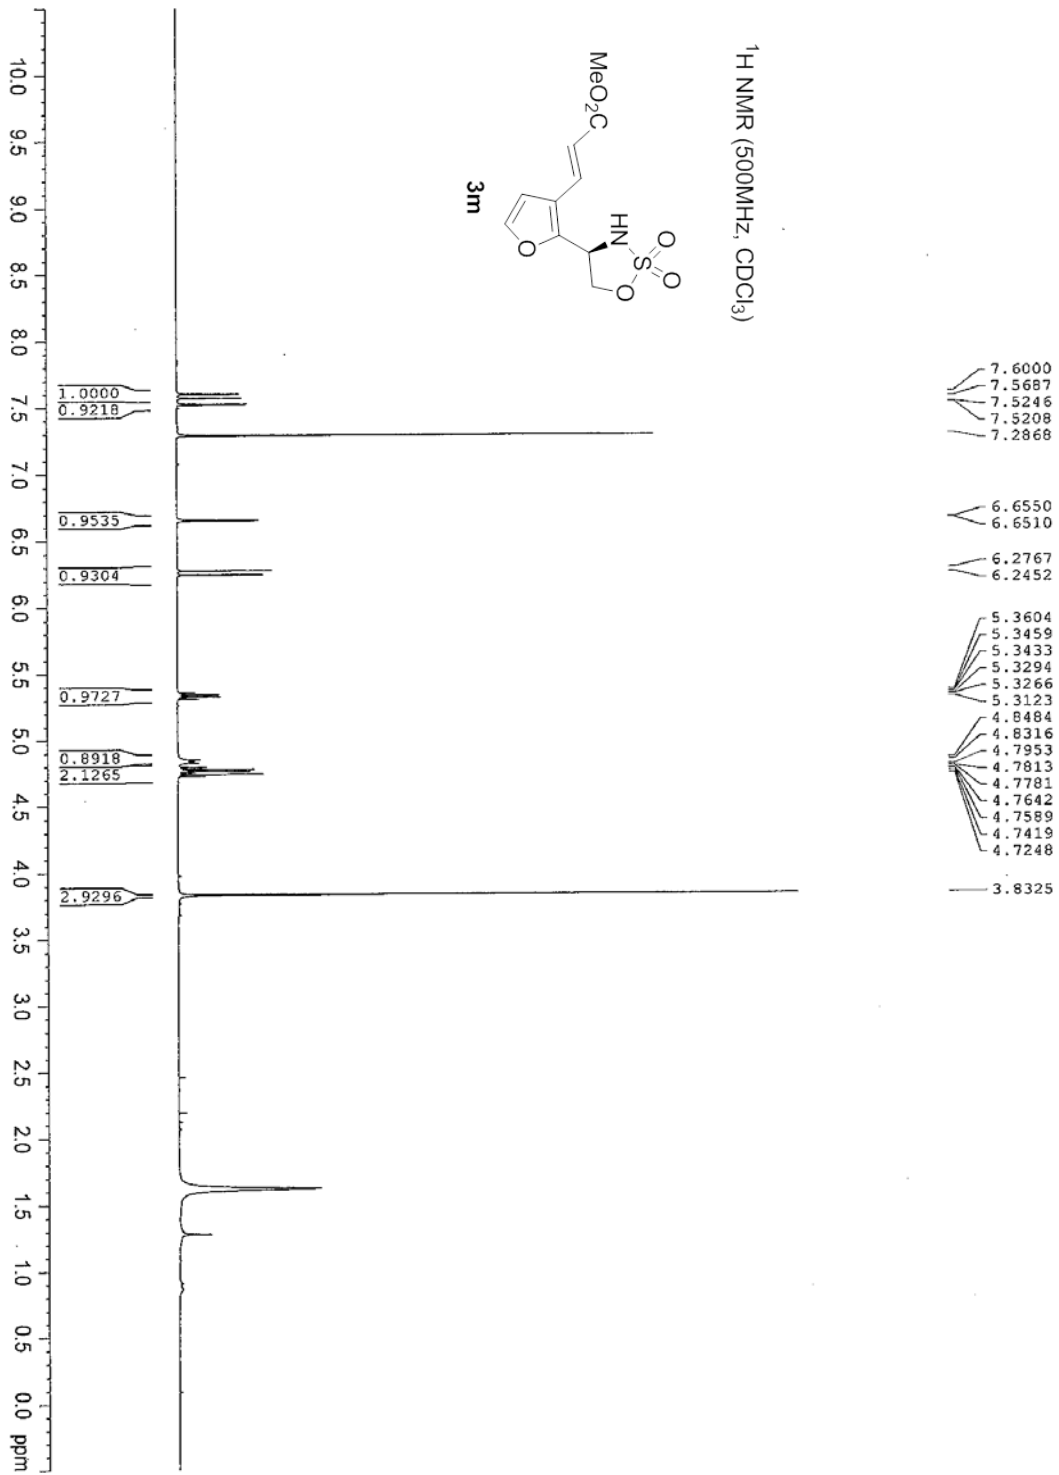

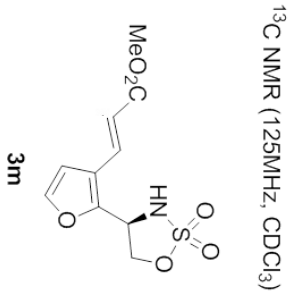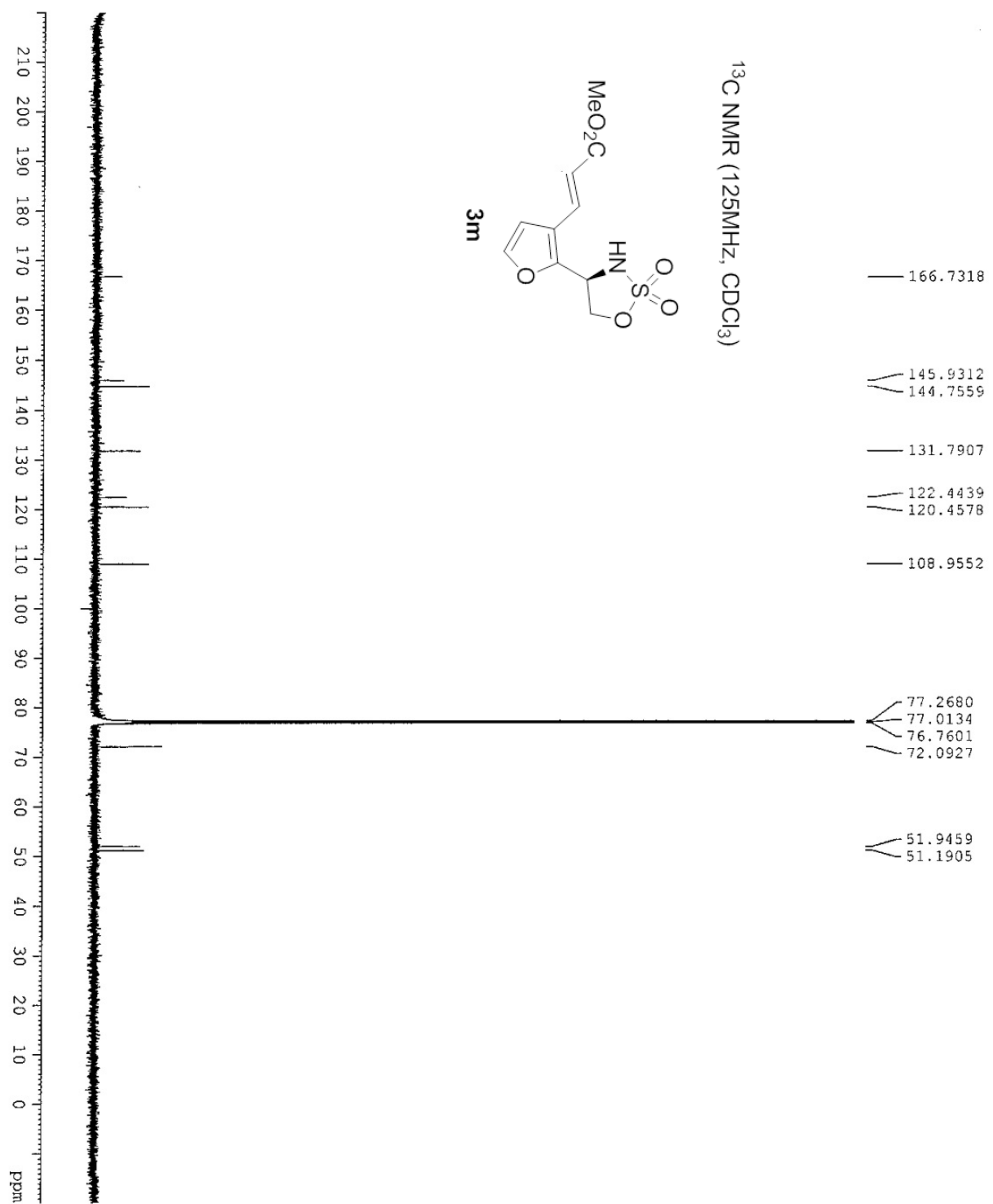

- 166.7318
- 145.9312
- 144.7559
- 131.7907
- 122.4439
- 120.4578
- 108.9552
- 77.2680
- 77.0134
- 76.7601
- 72.0927
- 51.9459
- 51.1905

```

NAME          SSM_150723-0-CC_up_17
EXPNO         1
PROCNO        1
Date_         20150123
Time          22.12
INSTRUM      spect
PROBHD       5 mm DUL 125C1
PULPROG      zgpg30
TD           32768
SOLVENT      CDCl3
NS           3600
DS           4
SMH          30303.021 Hz
FIDRES       0.924175 Hz
AQ           0.5401385 sec
RG           5792.6
DM           16.500 usec
DE           6.00 usec
TE           298.6 K
D1           2.00000000 sec
D11          0.03000000 sec
TD0          1

===== CHANNEL f1 =====
NUC1          13C
P1           8.00 usec
PL1          1.40 dB
PL1M         70.60438301 W
SFO1         125.7703661 MHz

===== CHANNEL f2 =====
CPOPRG2      waltz16
NUC2          1H
PCPD2        100.00 usec
PL2          -1.90 dB
PL12         16.00 dB
PL13         19.00 dB
PL2M         27.23318002 W
PL12M        0.44167015 W
PL13M        0.22135943 W
SFO2         500.1320005 MHz
SI           32768
SF           125.7577890 MHz
WDW          EM
SSB          0
LB           1.00 Hz
GB           0
PC           1.40
  
```

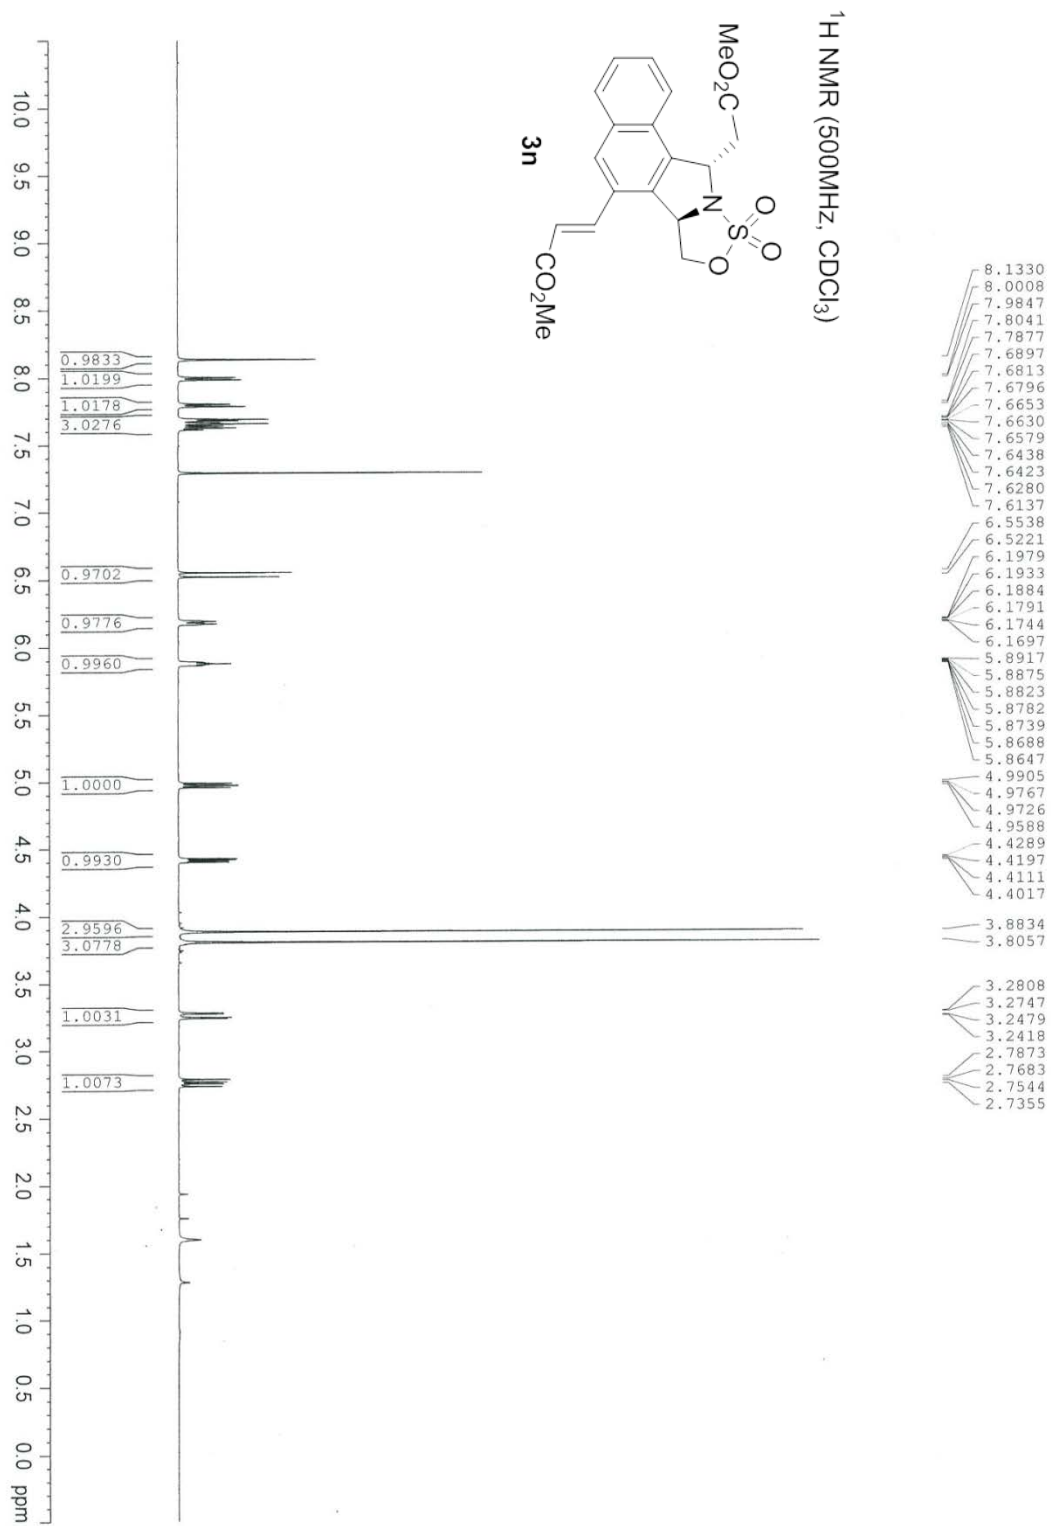

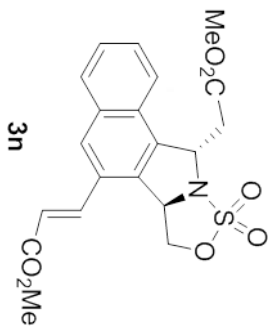

<sup>13</sup>C NMR (125MHz, CDCl<sub>3</sub>)

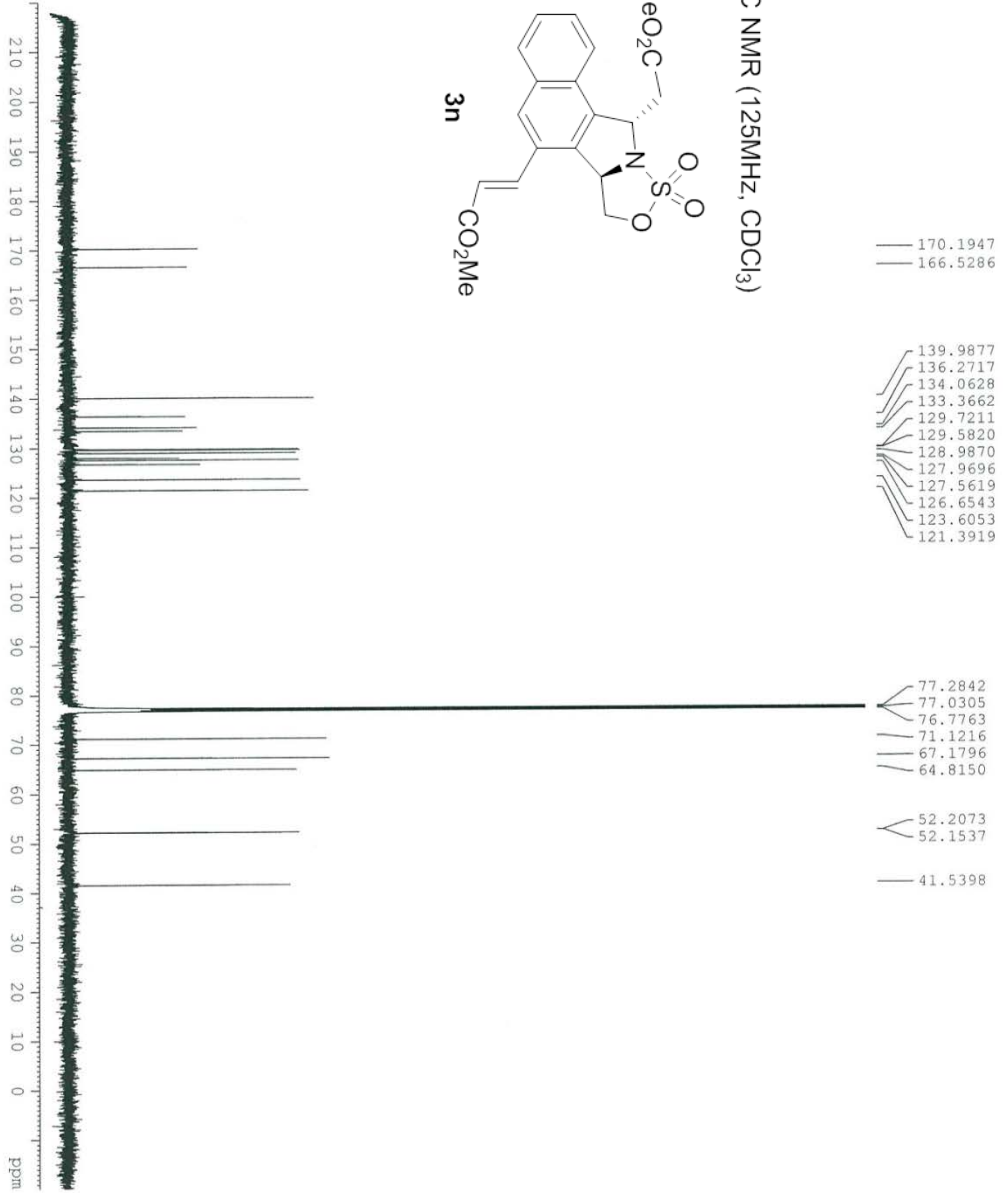

```

NAME          SSM_160122_naph_cc
EXPNO         1
PROCNO        1
Date_         20160125
Time_        11.12
INSTRUM       spect
PROBHD        13C-1
PULPROG       zgpg30
TD            32768
SOLVENT       CDCl3
NS            2640
DS            2
SWH           30303.031 Hz
FIDRES        0.924775 Hz
AQ            0.5407385 sec
RG            256
DW            16.500 usec
DE            6.00 usec
TE            297.1 K
D1            2.00000000 sec
D11           0.03000000 sec
TD0           1

===== CHANNEL f1 =====
NUC1          13C
P1            8.00 usec
PL1           1.40 dB
PL1W          70.60439301 W
SFO1          125.7703661 MHz

===== CHANNEL f2 =====
CPDPRG2      waltz16
NUC2          1H
PCPD2        100.00 usec
PL2          -1.90 dB
PL12         16.00 dB
PL13         19.00 dB
PL2W         27.23316002 W
PL12W        0.44167015 W
PL13W        0.22135943 W
SFO2          500.1320005 MHz
SI           32768
SF           125.7577890 MHz
WDW           EM
SSB           0
LB            1.00 Hz
GB            0
PC            1.40
  
```



- 2D-NOESY of 3n

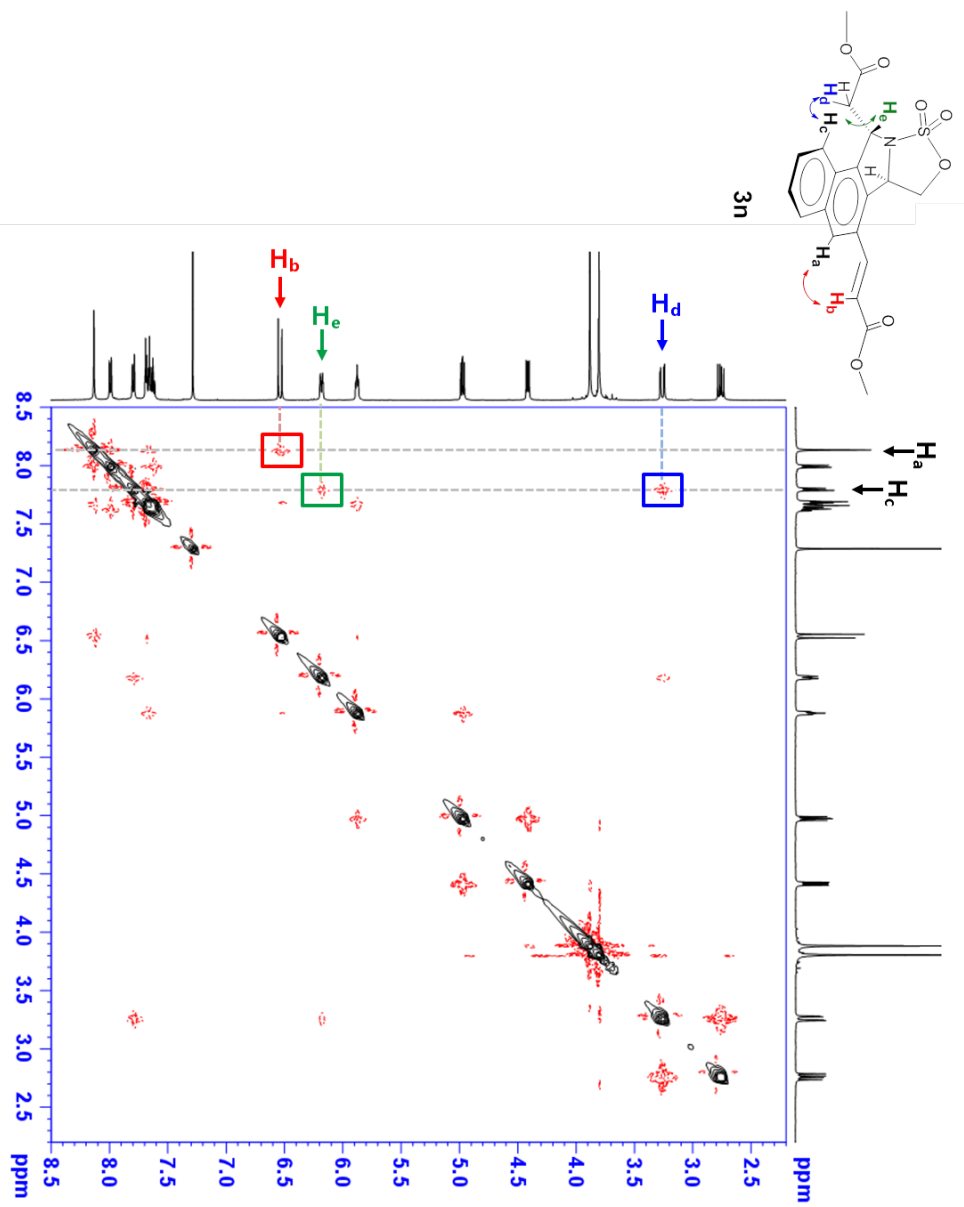

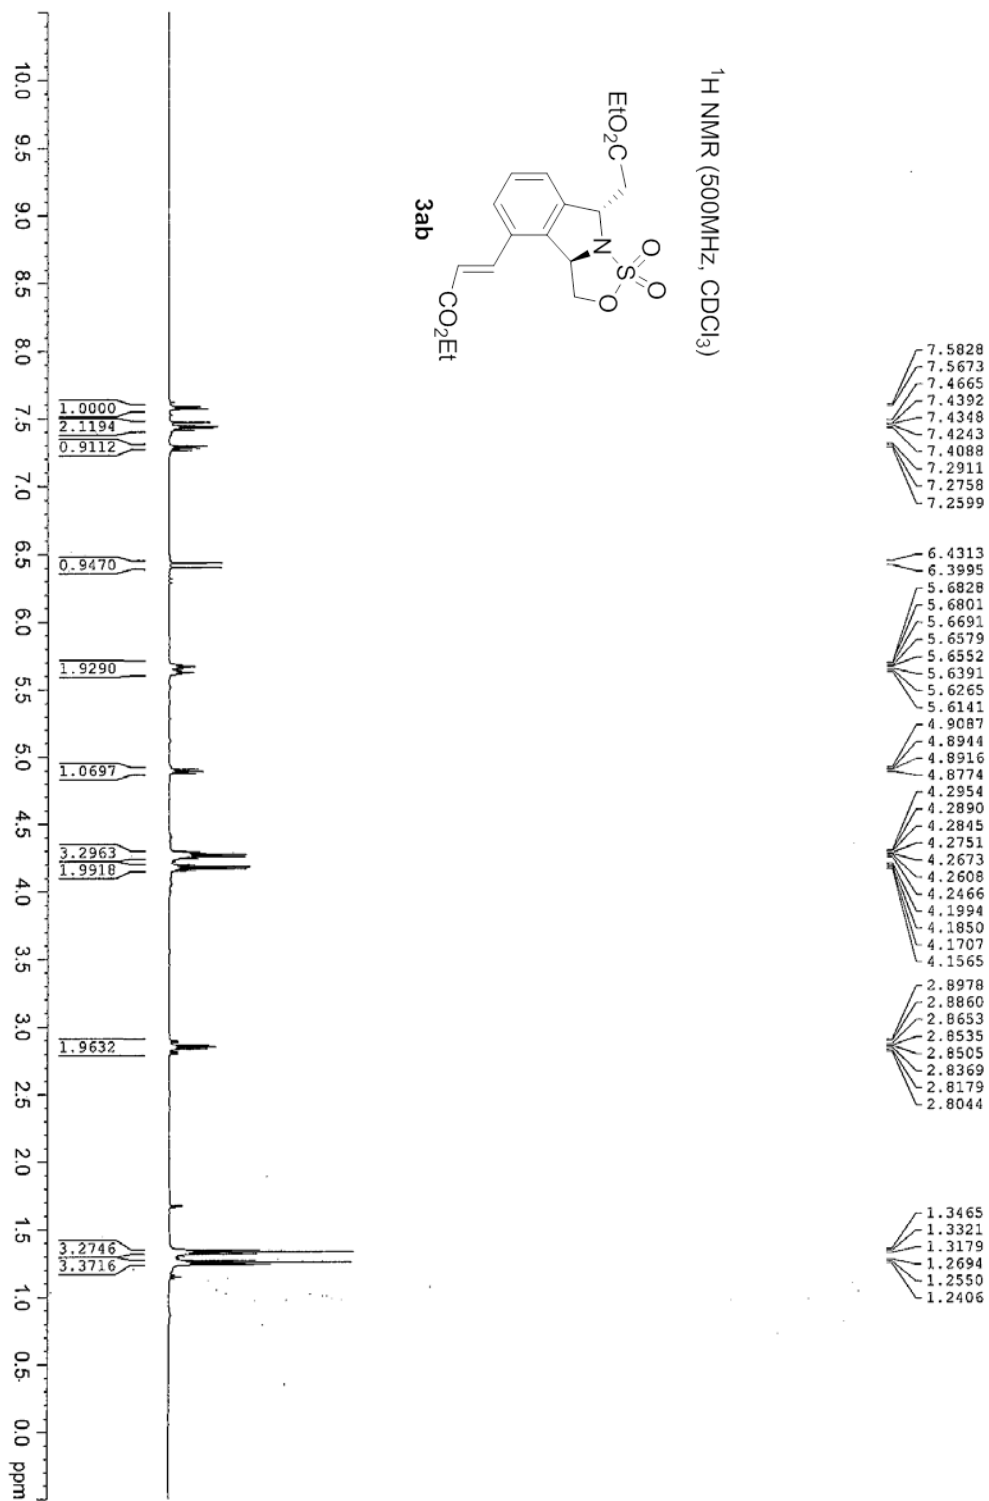

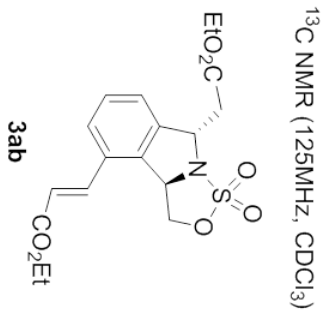

<sup>13</sup>C NMR (125MHz, CDCl<sub>3</sub>)

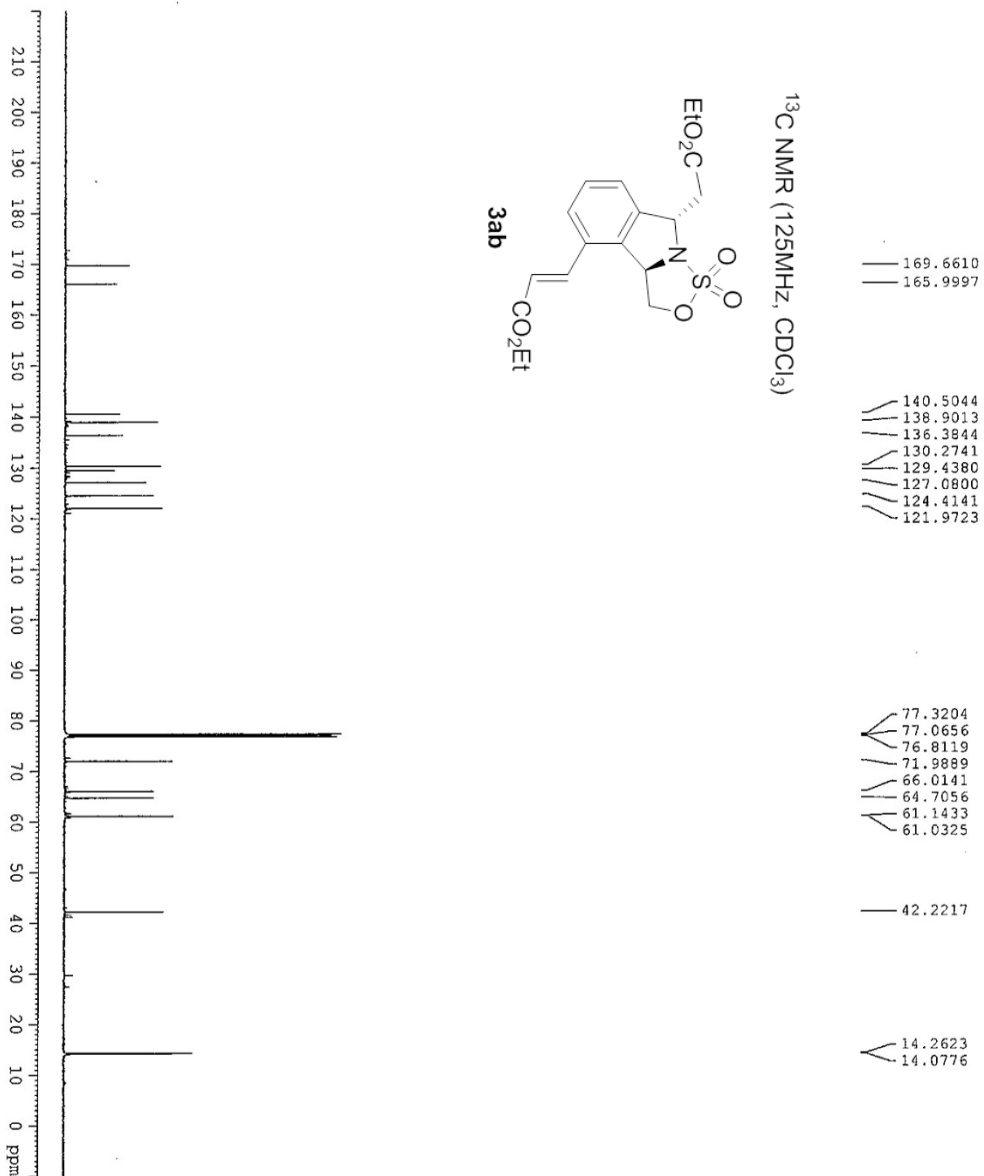

```

NAME          SYJ_Et_check_0619
EXPNO         1
PROCNO        1
Date_         20150619
Time          11:22
INSTRUM       spect
PROBHD        5 mm DUL 13C-1
PULPROG       zgpg30
TD            32768
SOLVENT       CDCl3
NS            1000
DS            2
SFR          30303.031 Hz
FIDRES        0.324775 Hz
AQ            0.3407385 sec
RG            456.1
DW            16.500 usec
DE            6.00 usec
TE            298.5 K
D1            2.00000000 sec
D11           0.03000000 sec
TD0           1

===== CHANNEL f1 =====
NUC1          13C
P1            8.00 usec
PL1           1.40 dB
PL1W          70.60433901 W
SFO1         125.7703661 MHz

===== CHANNEL f2 =====
CPRPRG2      waltz16
NUC2          1H
PCPD2        100.00 usec
PI2           -1.90 dB
E1I2         16.00 dB
E1I3         19.00 dB
E1I2W        27.23316002 W
E1I3W        0.44167015 W
PL12W        0.22135943 W
SFO2         500.1320005 MHz
SI           32768
SF           125.7577890 MHz
WDW          EM
SSB          0
LB           1.00 Hz
GB           0
PC           1.40
  
```

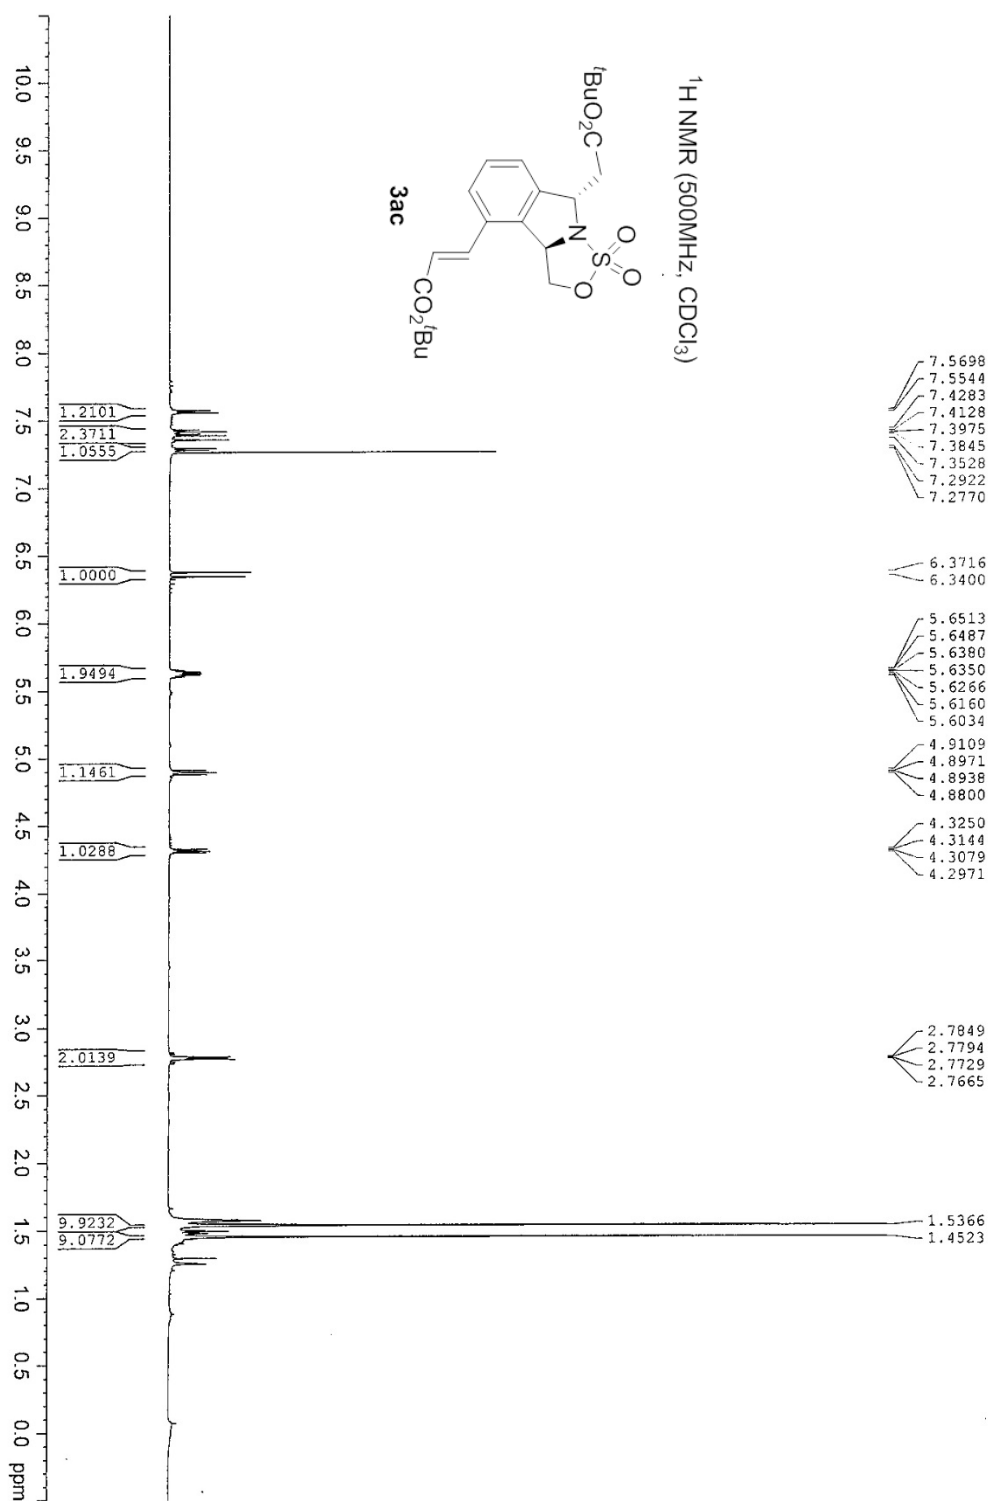

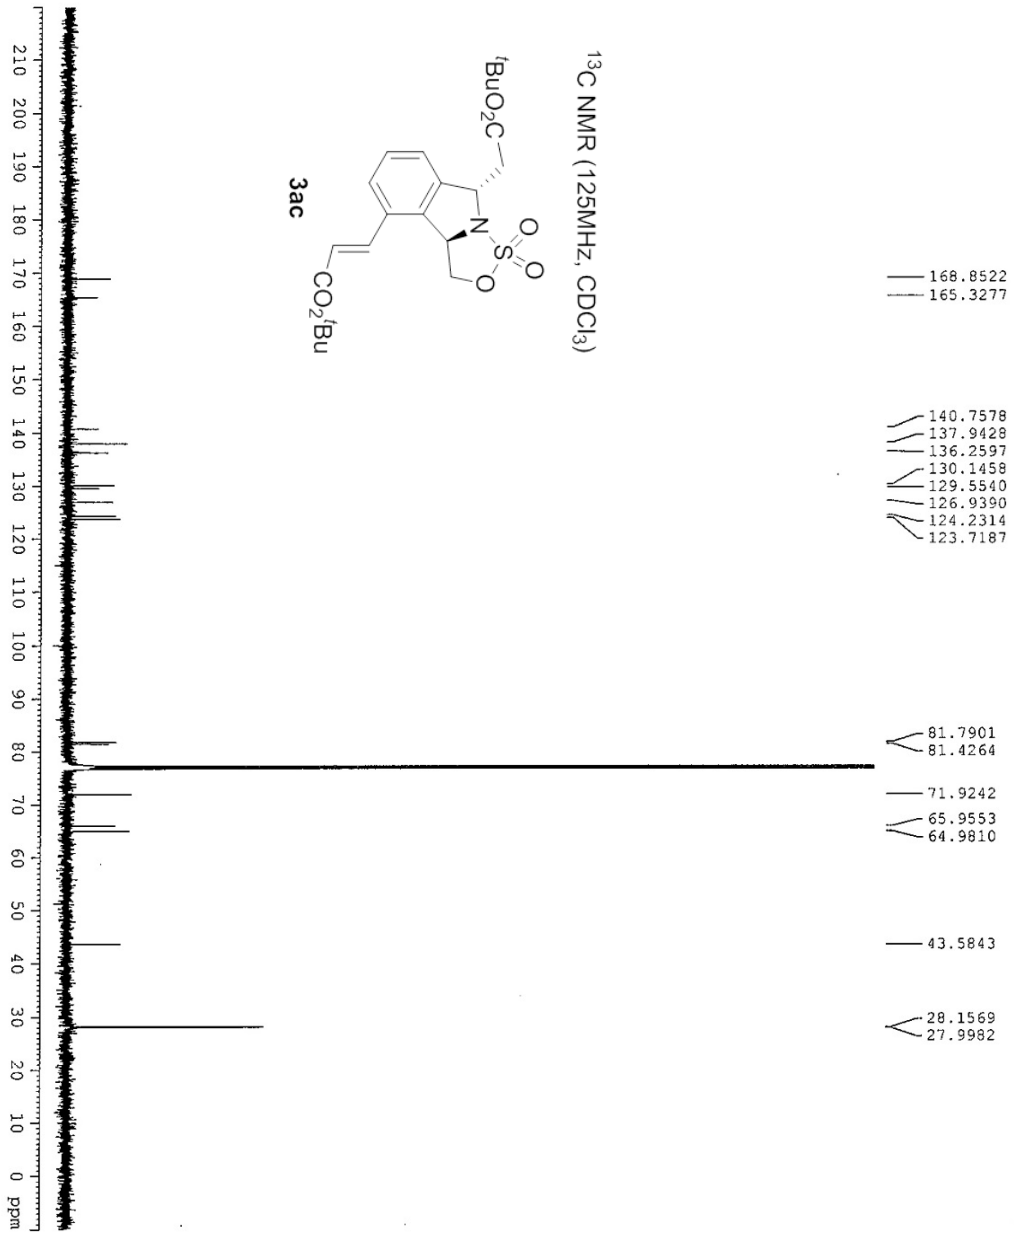

```

NAME          SVJ_f_bu_heck_ra_06:16_pure
EXPNO         2
PROCNO        1
Date_         20190626
Time          11:26
INSTRUM       spect
PROBHD        5 mm DUL 1Hc1
PULPROG       zgpg30
TD            32768
SOLVENT       CDCl3
NS            1000
DS            2
SWH           30303.031 Hz
FIDRES       0.924778 Hz
AQ           0.5407258 sec
RG           16.500 usec
DE           1.40 dB
TE           298.1 K
D1           2.00000000 sec
D11          0.03000000 sec
T00          1

===== CHANNEL f1 =====
NUC1          13C
P1            8.40 usec
PL1           1.40 dB
PL1W          70.60439301 W
SFO1         125.7703661 MHz

===== CHANNEL f2 =====
NAME         waltz16
NUC2         13C
PCPD2        100.00 usec
PL2          -1.90 dB
PL12         16.00 dB
PL13         19.00 dB
PL14         27.23316002 W
PL15W        0.44167015 W
PL12W        0.22135043 W
SFO2         500.132009 MHz
SF           125.7578690 MHz
WDW          EM
SSB          0 Hz
LB           1.00 Hz
GB           0
FC           1.40

```

<sup>1</sup>H NMR (500MHz, CDCl<sub>3</sub>)

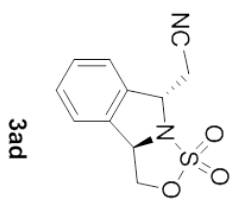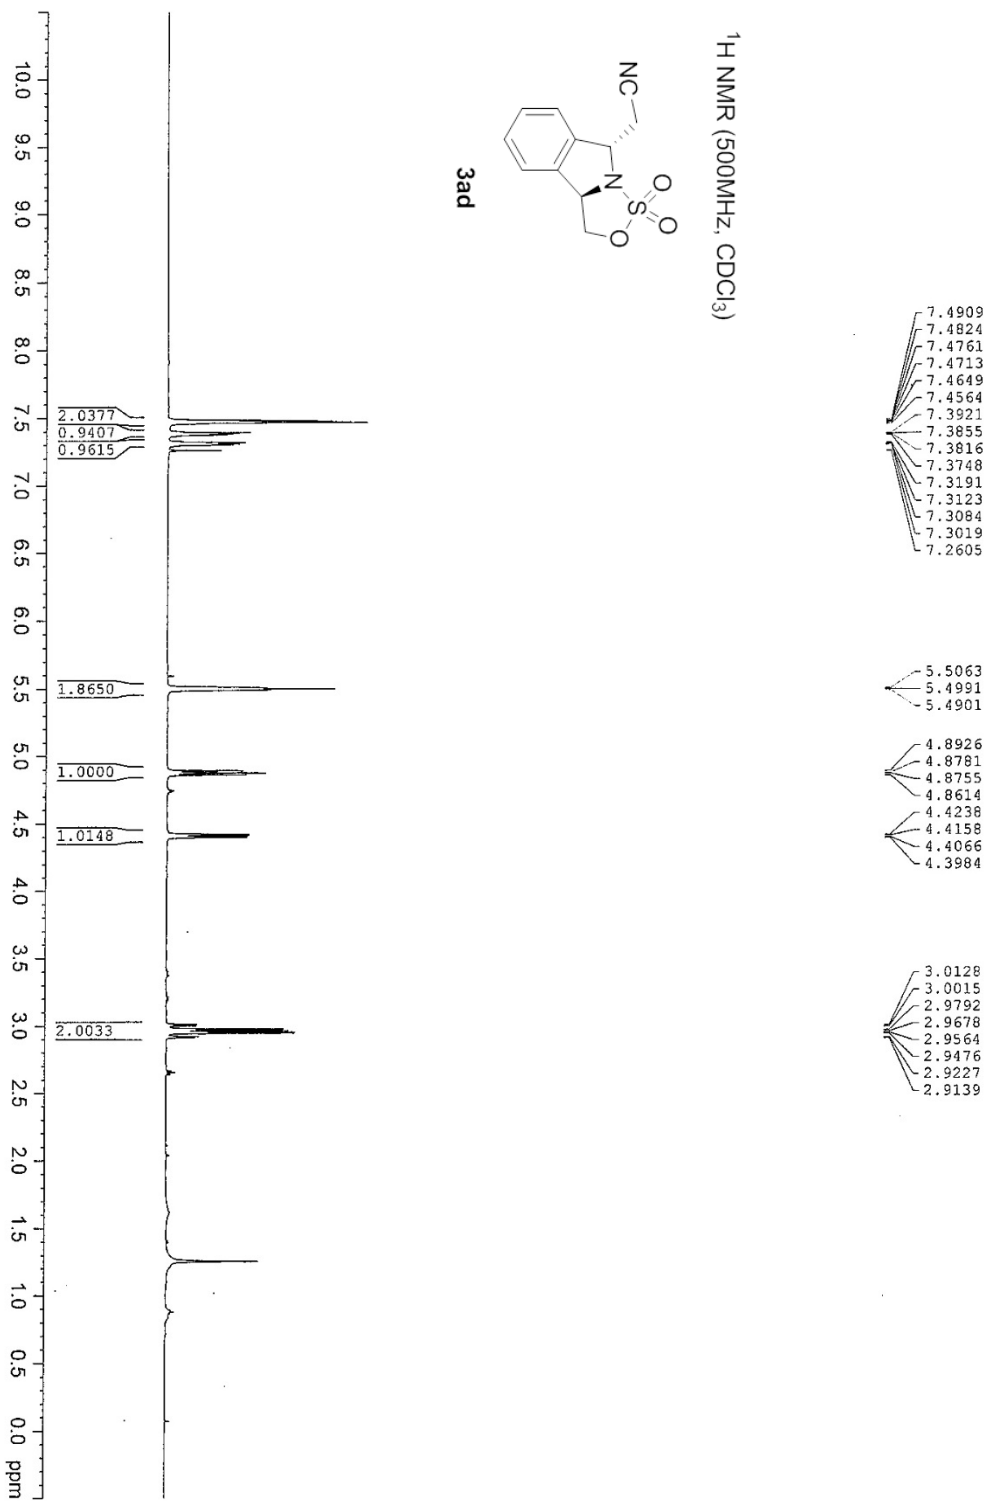

<sup>13</sup>C NMR (125MHz, CDCl<sub>3</sub>)

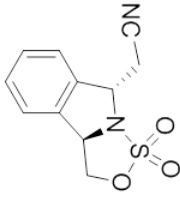

3ad

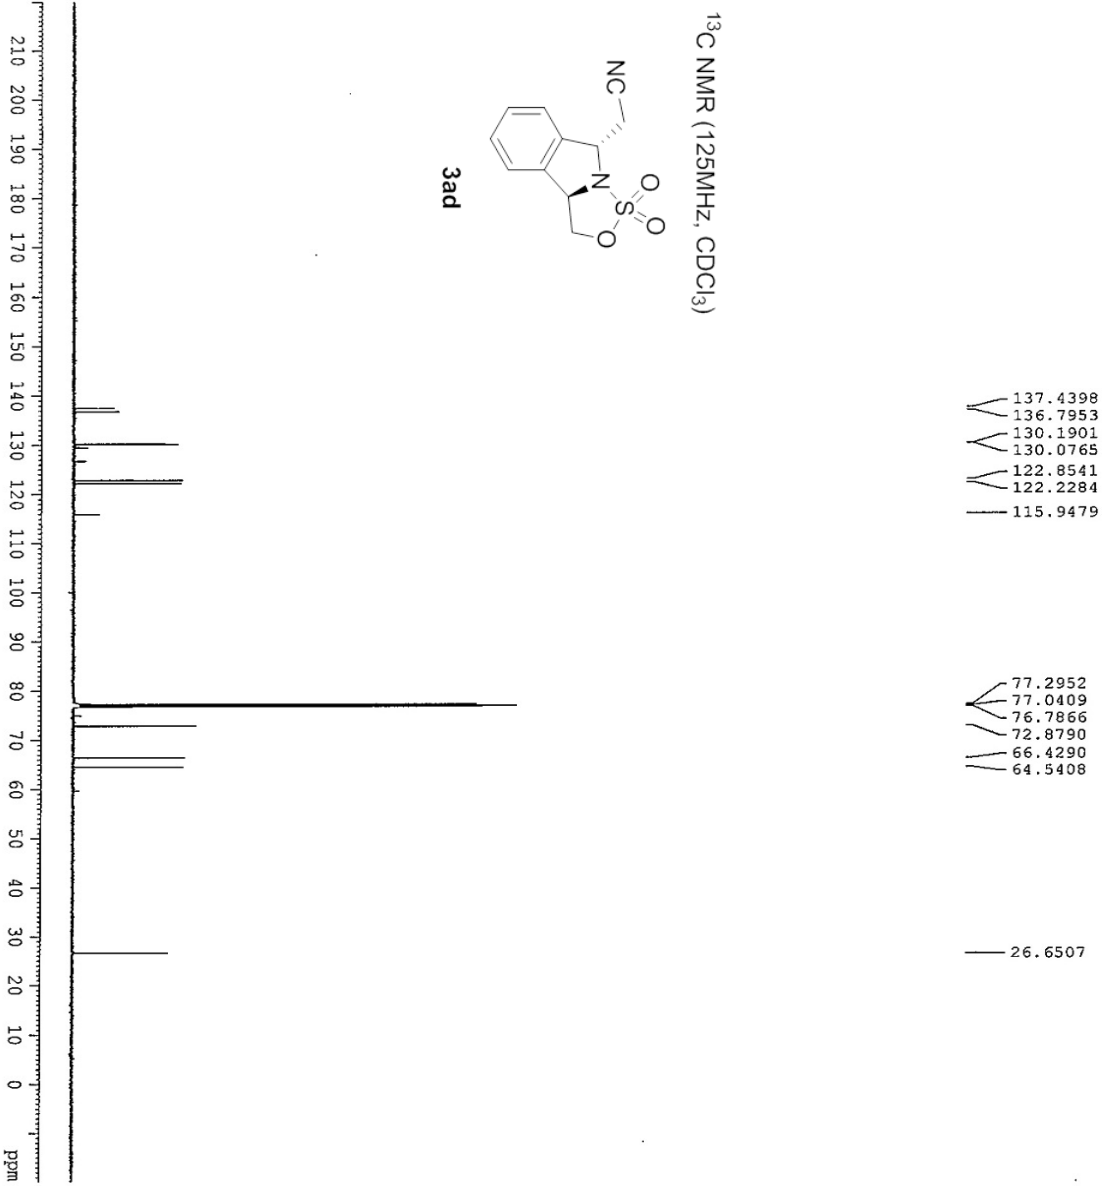

```

NAME          SYD_CNheck_0619
EXPNO         1
PROCNO        1
Date_         20150619
Time_         10.31
INSTRUM       spect
PROBHD        5 mm DUL 13C-1
PULPROG       zgpg30
TD            32768
SOLVENT       CDCl3
NS            1000
DS            2
SWH           30303.031 Hz
FIDRES        0.924775 Hz
AQ            0.5407385 sec
RG            161.3
DM            16.500 usec
DE            6.00 usec
TE            298.4 K
D1            2.00000000 sec
D11           0.03000000 sec
TD0           1

===== CHANNEL F1 =====
NUC1          13C
P1            8.00 usec
PL1           1.40 dB
PL1W          70.60433301 W
SFO1          125.7703661 MHz

===== CHANNEL F2 =====
CPDPRG2      walcz16
NUC2          1H
PCPD2        100.00 usec
PL2          -1.90 dB
PL12         16.00 dB
PL13         19.00 dB
PL2W         27.23316002 W
PL12W        0.44167015 W
PL13W        0.22135943 W
SFO2         500.1320005 MHz
SI           32768
SF           125.7577890 MHz
WDW          EM
SSB          0
LB           1.00 Hz
GB           0
PC           1.40
  
```

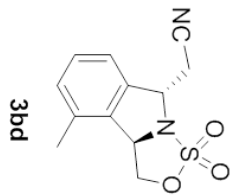

<sup>1</sup>H NMR (500MHz, CDCl<sub>3</sub>)

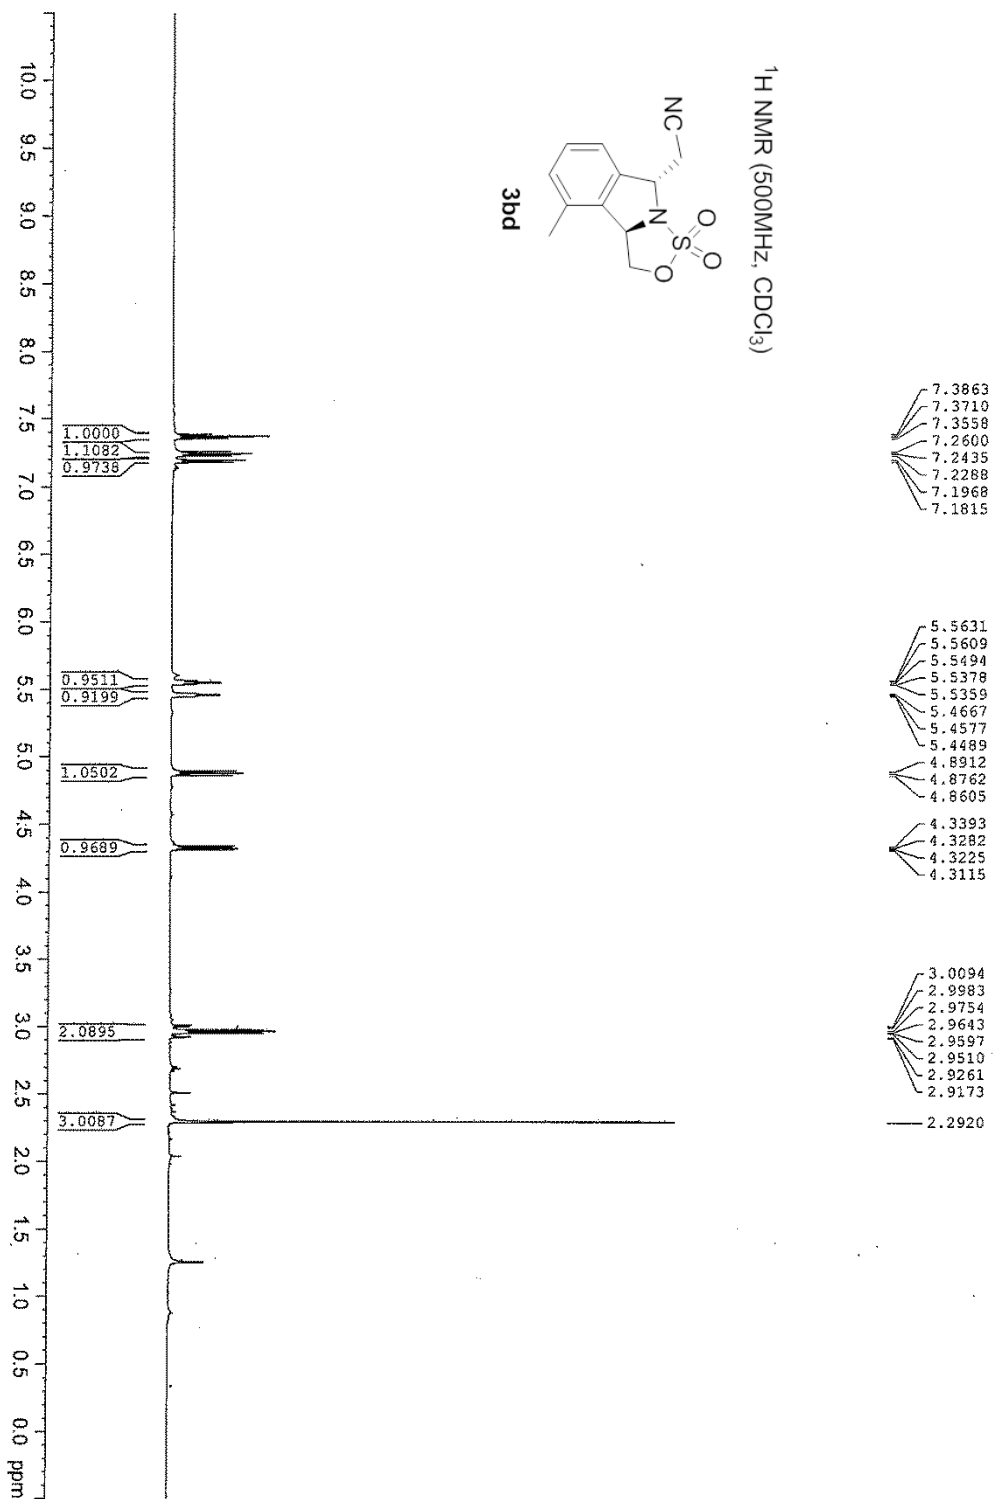



<sup>13</sup>C NMR (125MHz, CDCl<sub>3</sub>)

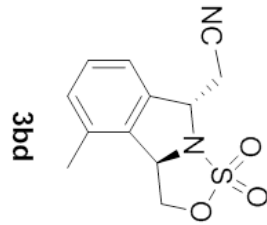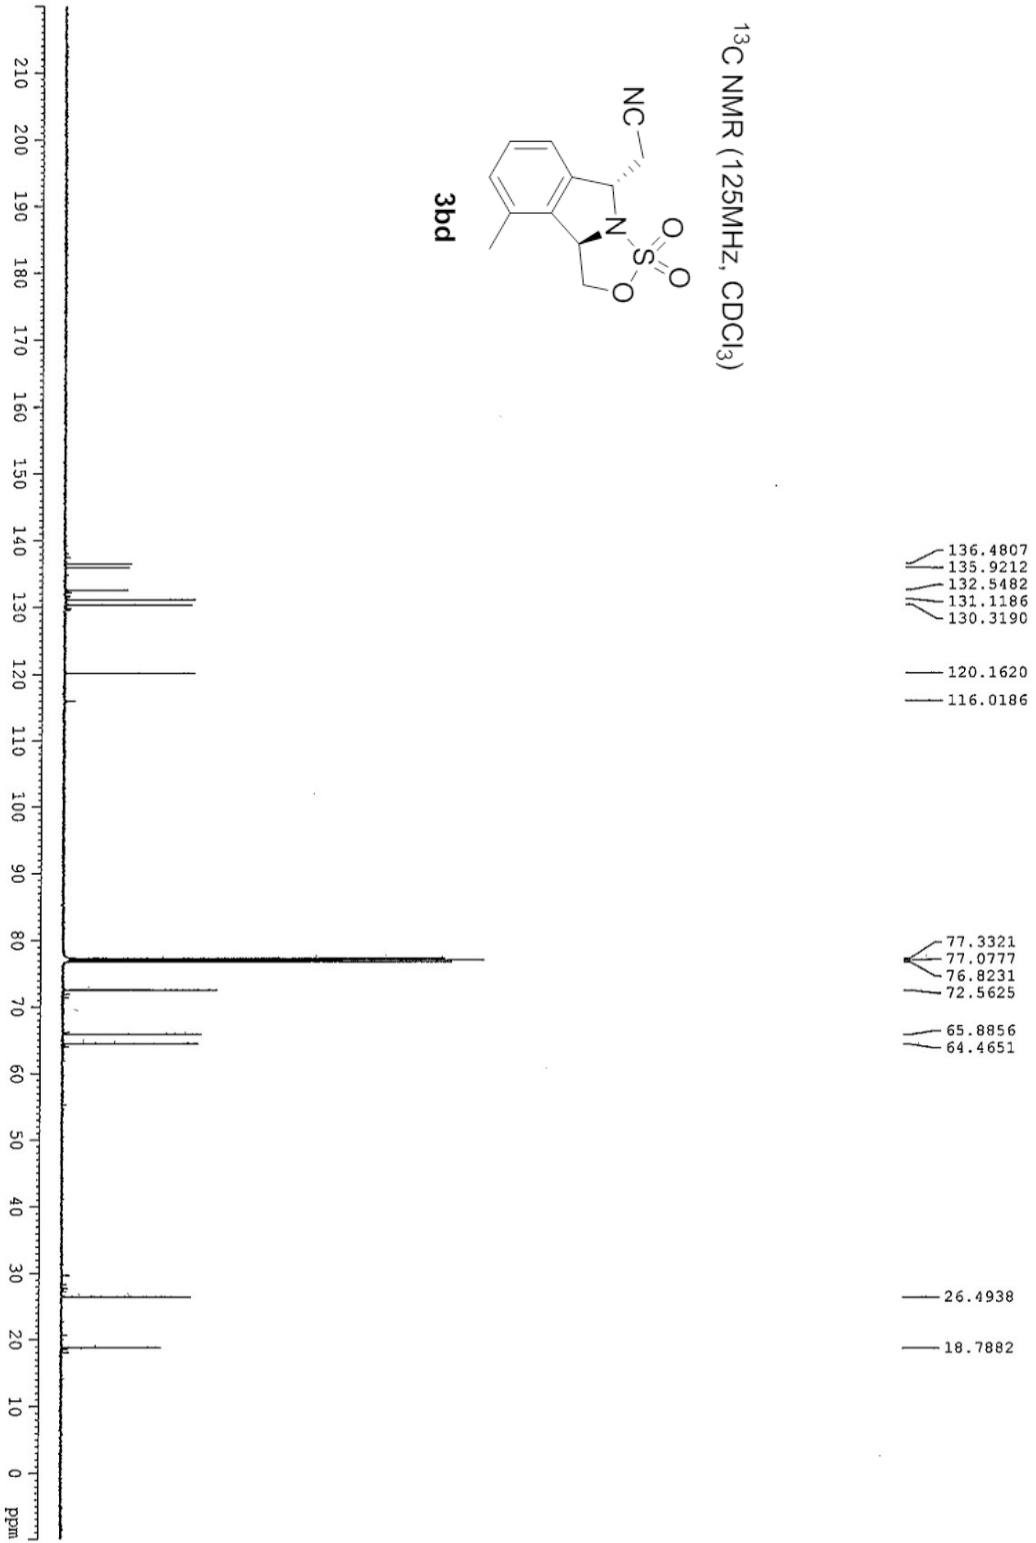

SYJ-sulfone-chiral-0713

<sup>1</sup>H NMR (500MHz, CDCl<sub>3</sub>)

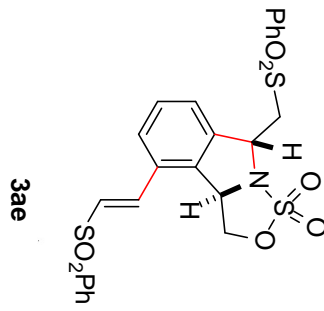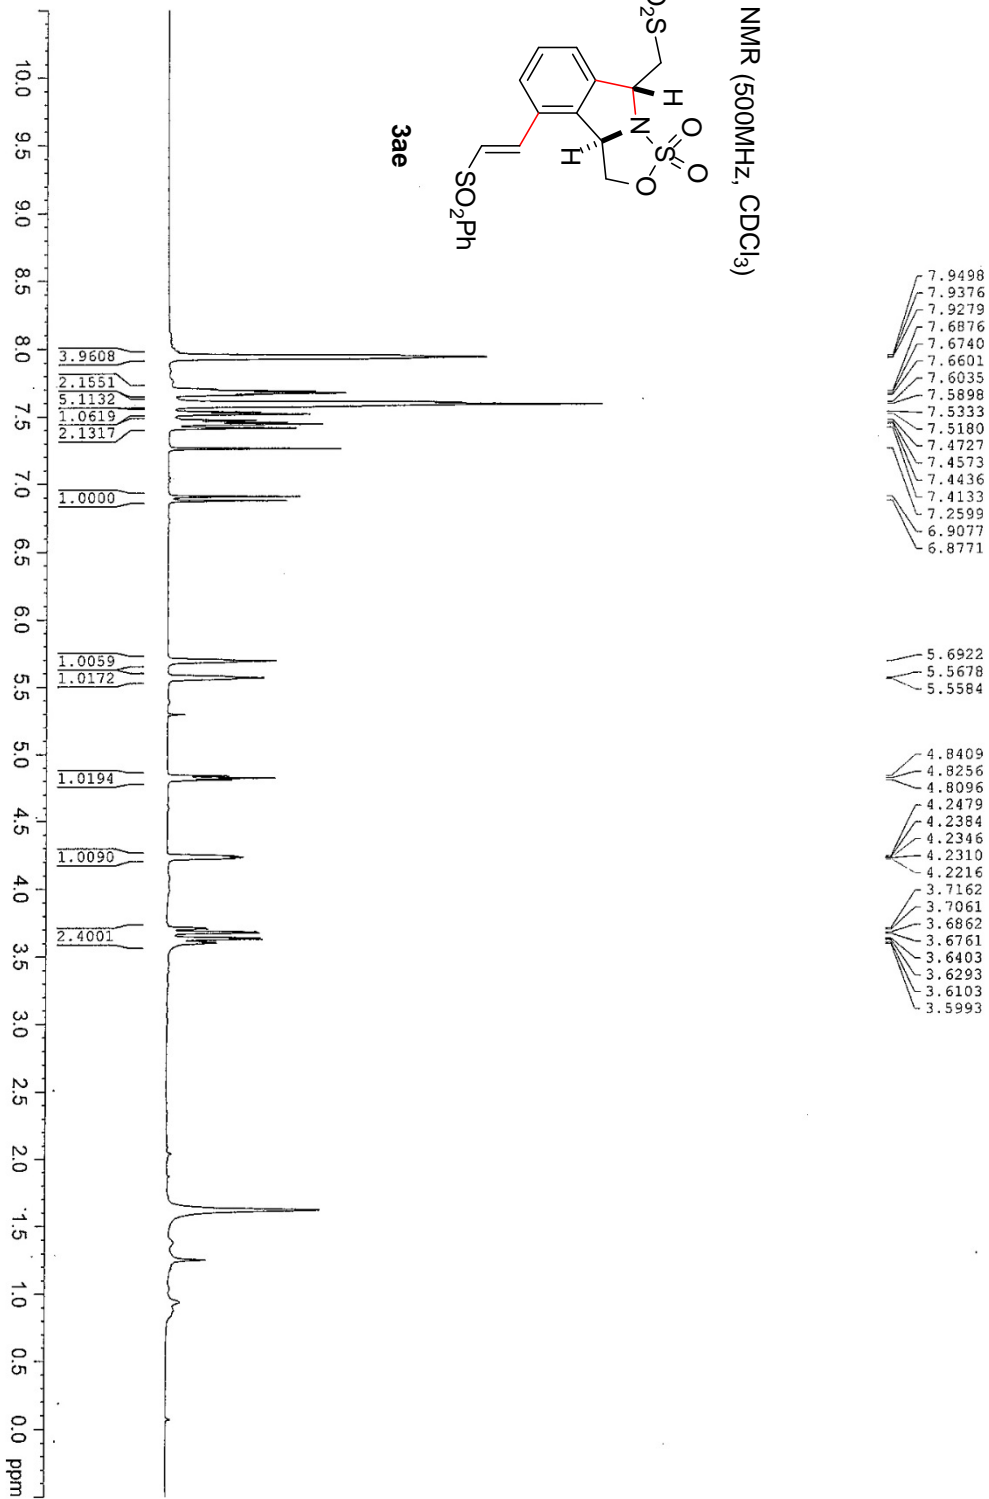

SYJ\_sulfone\_chiral\_0713

<sup>13</sup>C NMR (500MHz, CDCl<sub>3</sub>)

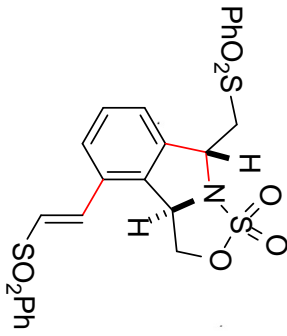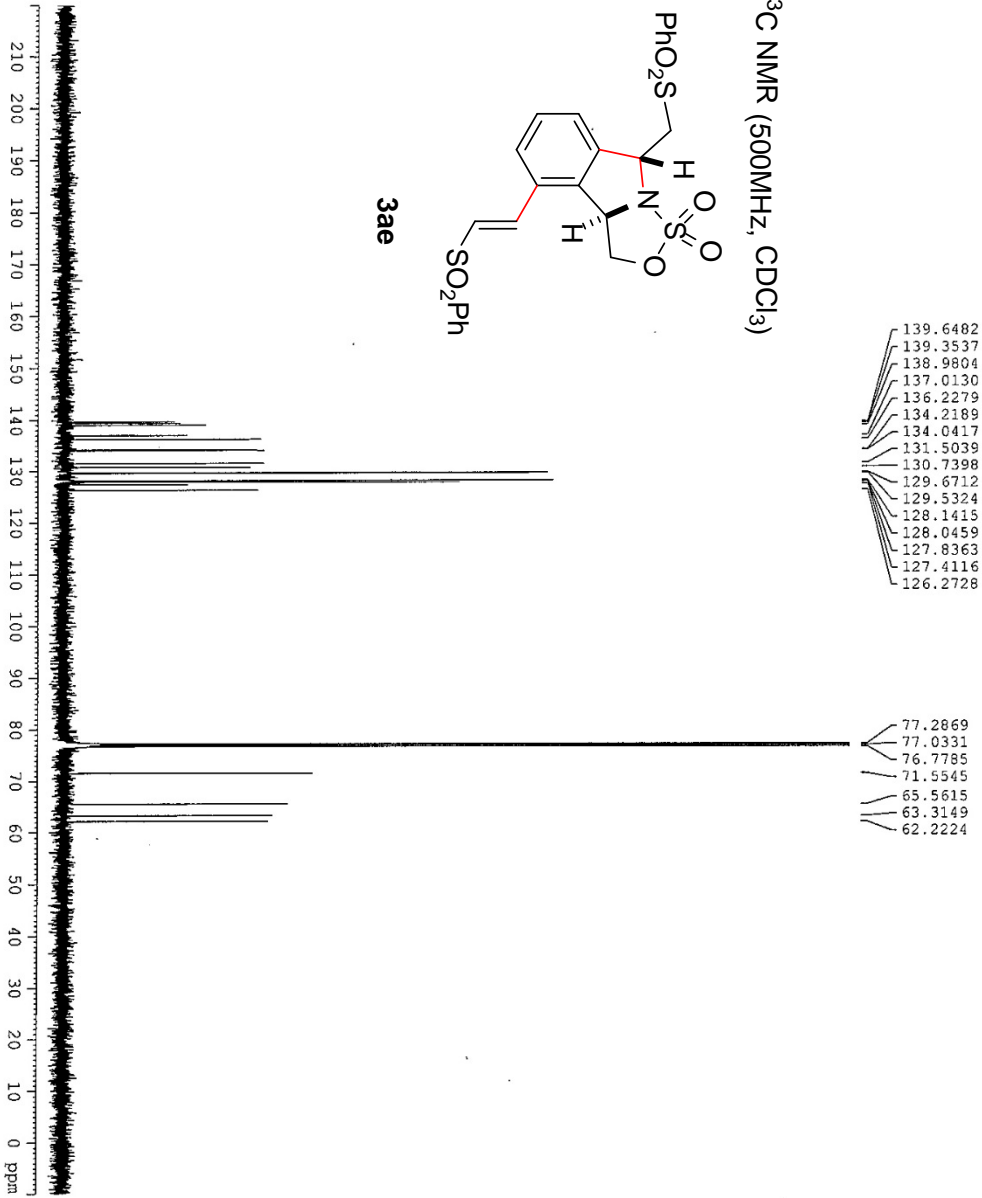

139.6482  
139.3537  
138.9804  
137.0130  
136.2279  
134.2189  
134.0417  
131.5039  
130.7398  
129.6712  
129.5324  
128.1415  
128.0459  
127.8363  
127.4116  
126.2728

77.2869  
77.0331  
76.7785  
71.5545  
65.5615  
63.3149  
62.2224

```

NAME          SYJ_sulfone_chiral_0713
EXPNO         1
PROCNO        1
Date_         20150714
Time          10.13
INSTRUM      spect
PROBHD       5 mm DUL 13C-1
PULPROG      zgpg30
TD            32768
SOLVENT      CDCl3
DS            1000
SWH           30303.031 Hz
FIDRES        0.924775 Hz
AQ            0.5407385 sec
RG            2298.8
DM            16.500 usec
DE            6.00 usec
TE            298.9 K
D1            2.00000000 sec
D11           0.03000000 sec
TD0           1

===== CHANNEL f1 =====
NUC1          13C
P1            8.00 usec
PL1           1.40 dB
F1M           70.6043301 W
SFO1          125.7703661 MHz

===== CHANNEL f2 =====
CPDPRG2      waltz16
NUC2          1H
PCPD2        100.00 usec
PL2           -1.50 dB
PL12          16.00 dB
PL13          19.00 dB
PL2M          27.23316002 W
PL12M         0.44167015 W
PL13M         0.22135943 W
SFO2          500.1320005 MHz
SI            32768
SF            125.7577890 MHz
WDW           EM
SSB           0
LB            1.00 Hz
GB            0
PC            1.40
  
```

<sup>1</sup>H NMR (500MHz, CDCl<sub>3</sub>)

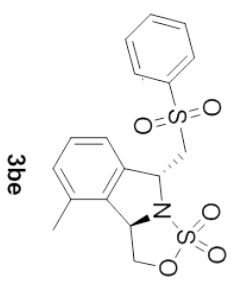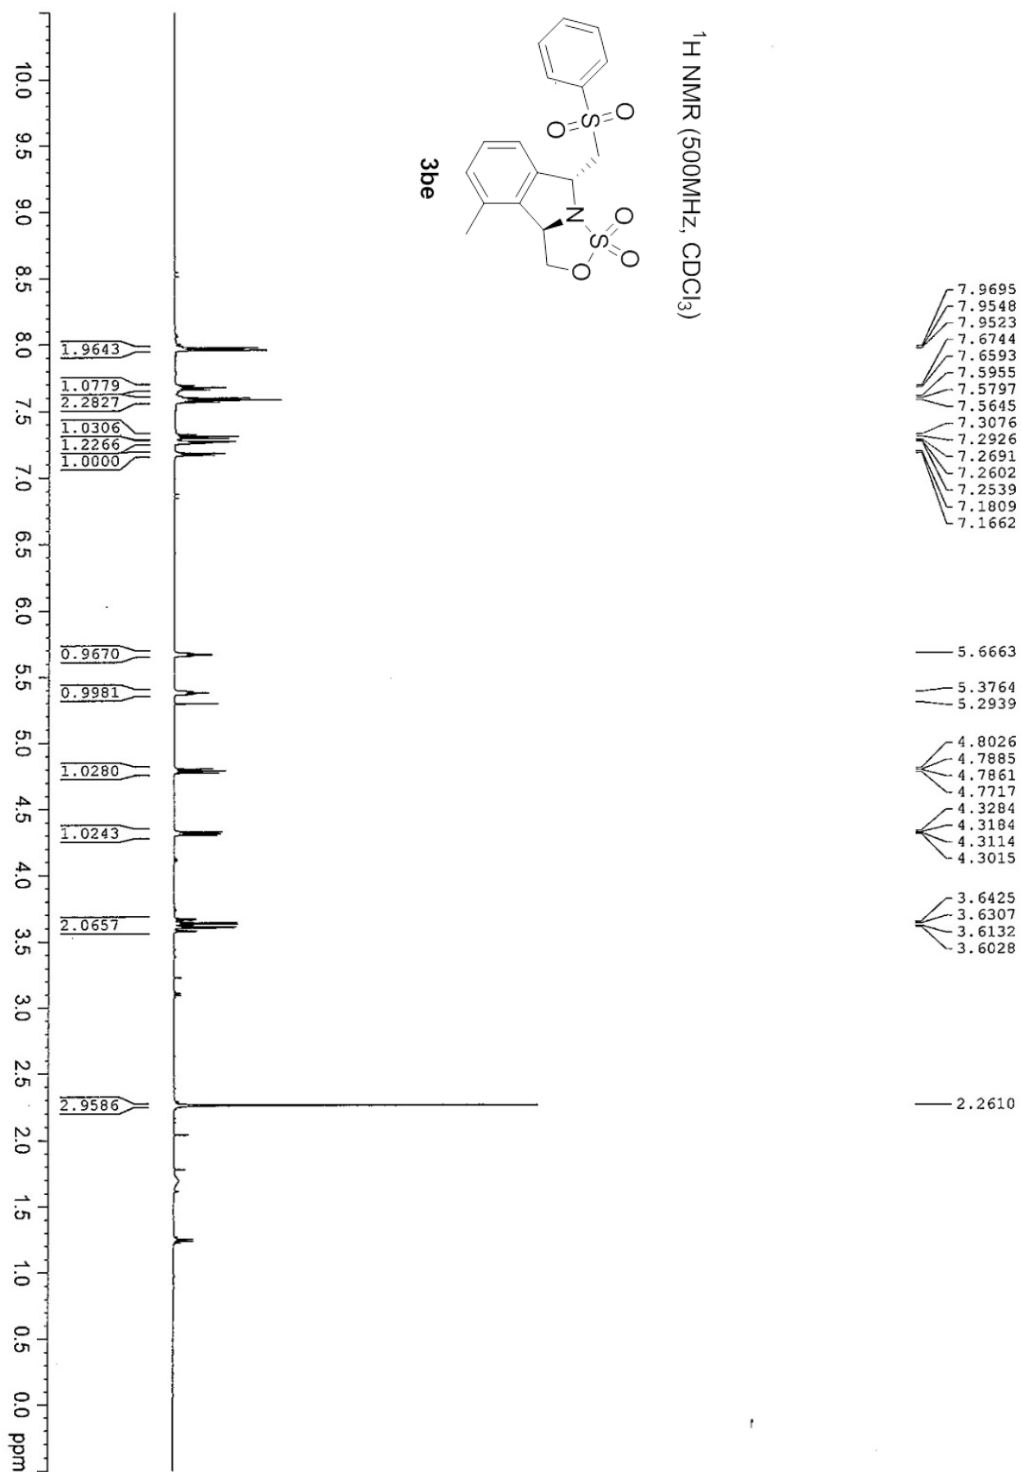

<sup>13</sup>C NMR (125MHz, CDCl<sub>3</sub>)

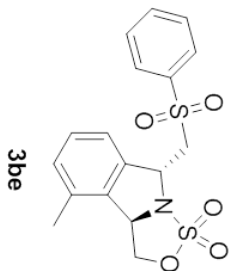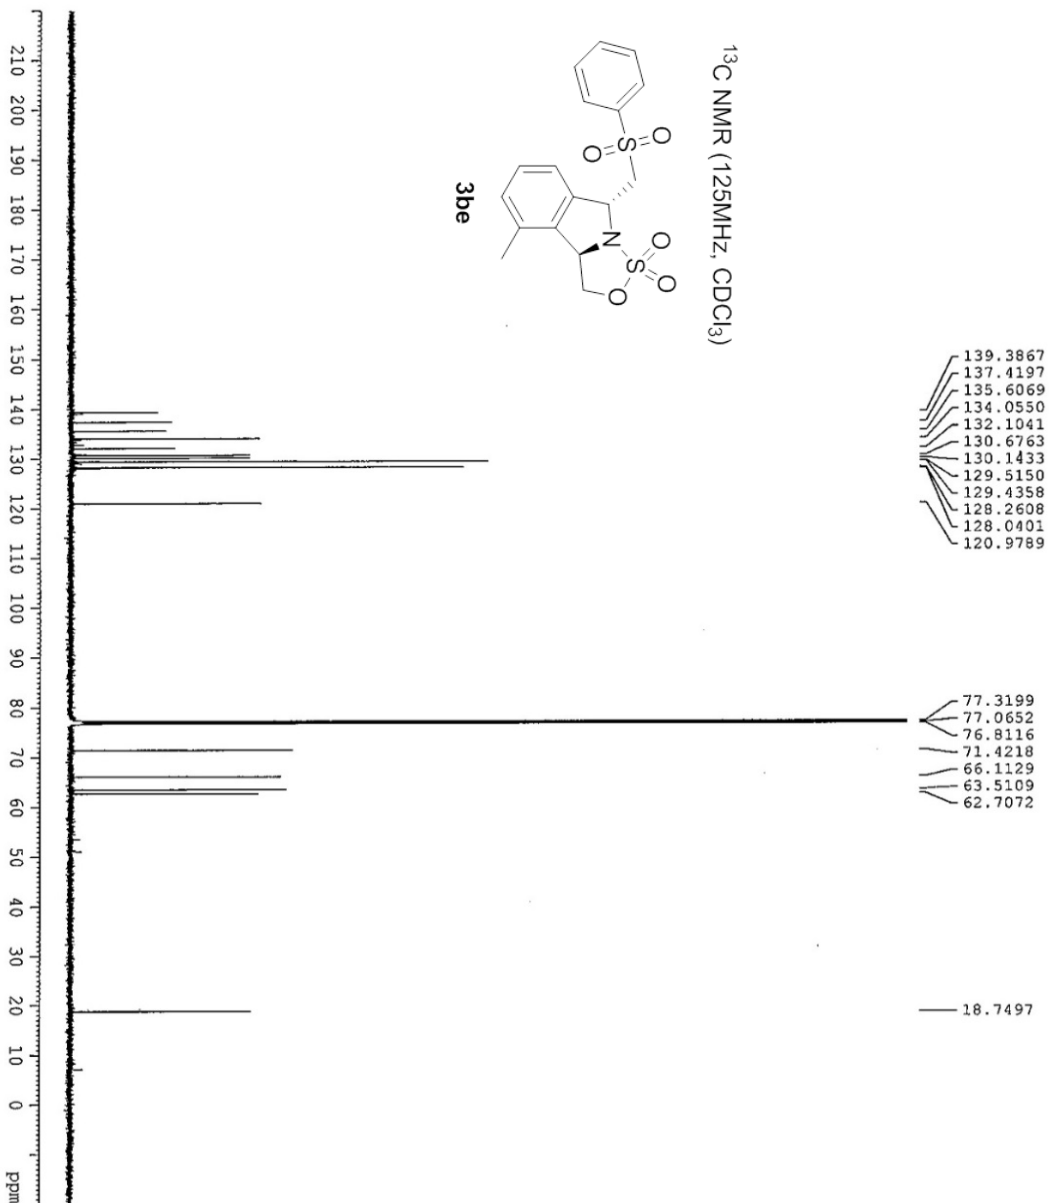

```

NAME          SYJ_2me_sulfone_1015
EXPNO         2
PROCNO        1
Date_         20151015
Time_         10.32
INSTRUM       spect
PROBHD        5 mm DUL 13C-1
PULPROG       zgpg30
TD            32768
SOLVENT       CDCl3
NS            1000
DS            2
SWH           30303.031 Hz
FIDRES        0.924775 Hz
AQ            0.5407385 sec
RG            3251
DM            16.500 usec
DE            6.00 usec
TE            295.9 K
D1            2.00000000 sec
D11           0.03000000 sec
TD0           1

===== CHANNEL f1 =====
NUC1          13C
P1            8.00 usec
PL1           1.40 dB
PL1W          70.60439301 W
SFO1          125.7703661 MHz

===== CHANNEL f2 =====
CPDPRG2      waltz16
NUC2          1H
PCPD2        100.00 usec
PL2           -1.90 dB
PL12          16.00 dB
PL13          19.00 dB
PL2W          27.23316002 W
PL12W         0.44167015 W
PL13W         0.221358943 W
SE02          500.1320005 MHz
SI            32768
SF            125.7577890 MHz
WDW           EM
SSB           0
LB            1.00 Hz
GB            0
PC            1.40
  
```

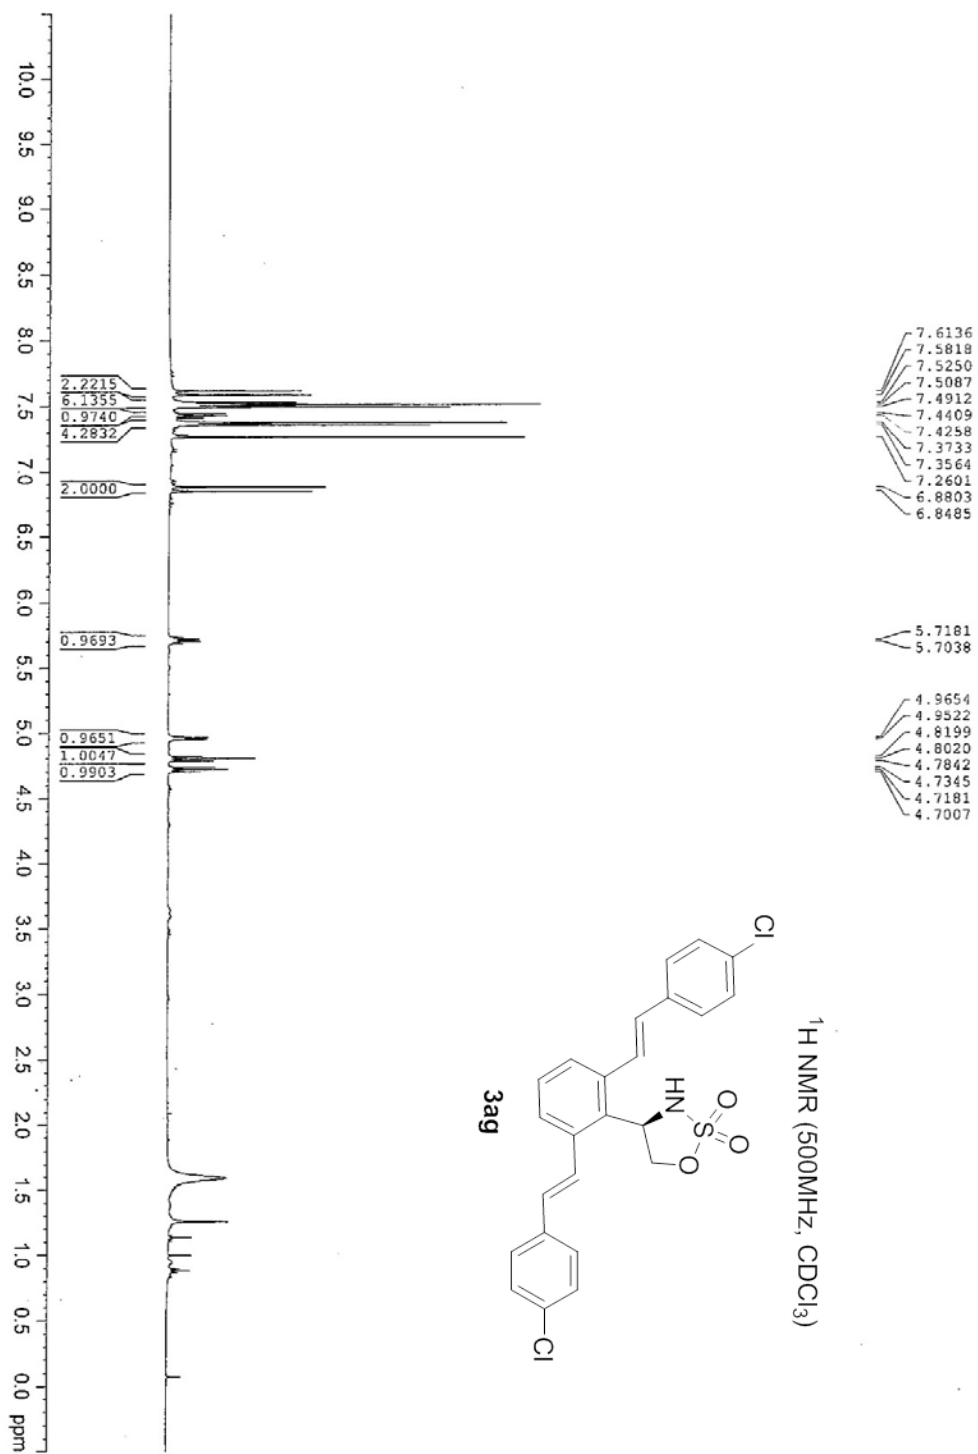

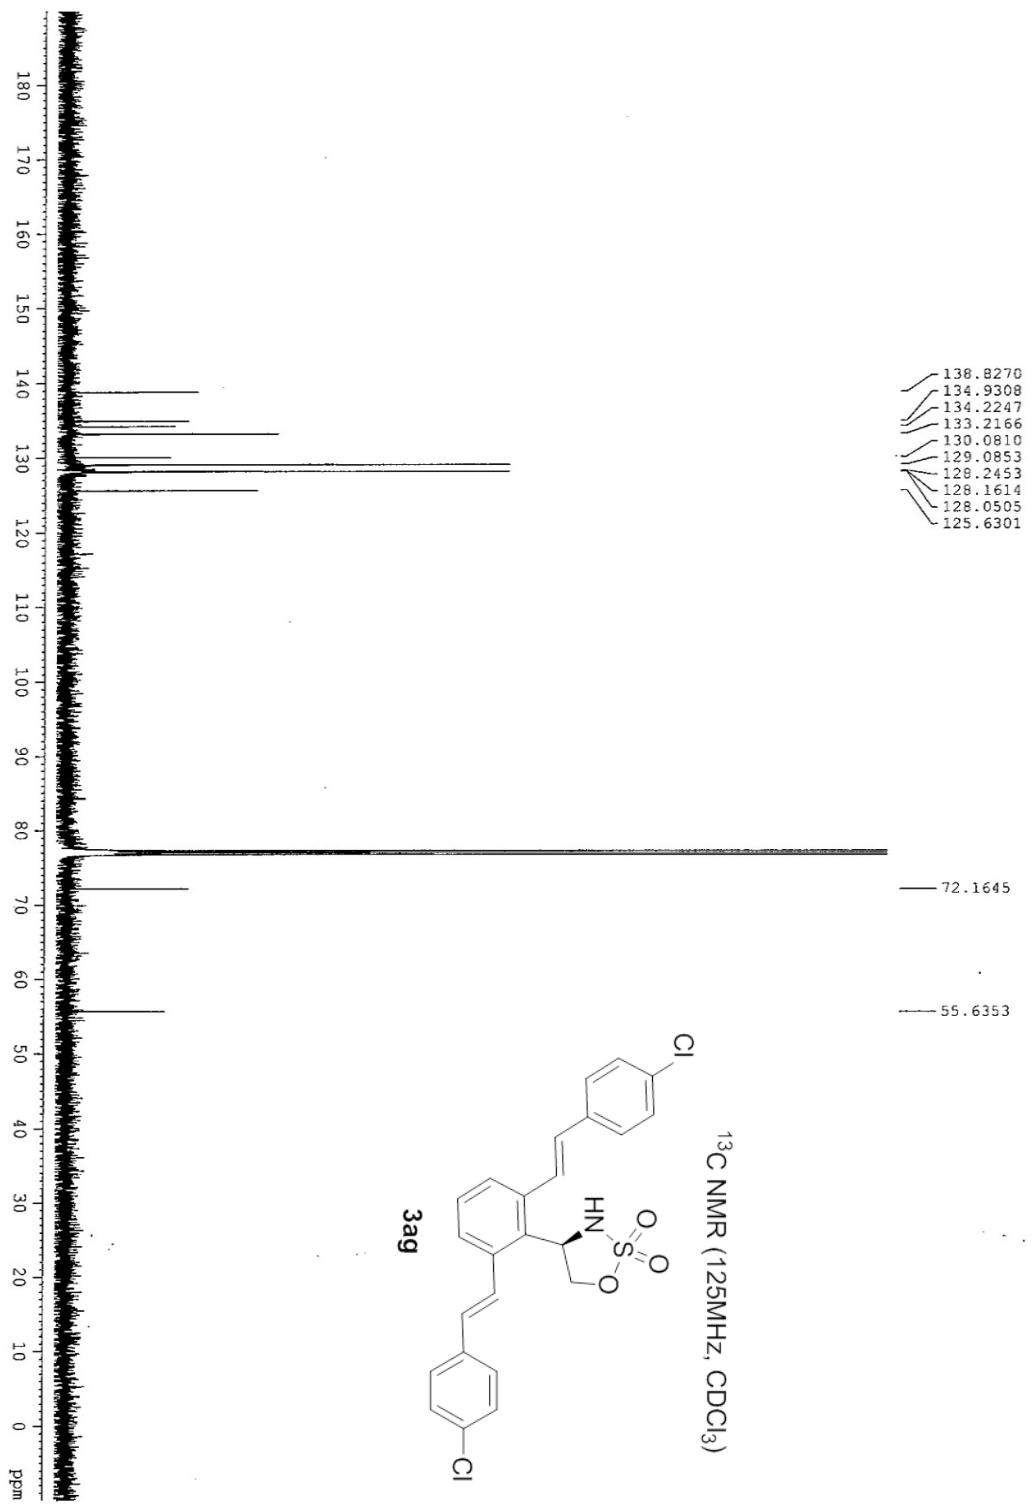

SYJ\_2Me\_4Cl\_heck\_0127

<sup>1</sup>H NMR (500MHz, CDCl<sub>3</sub>)

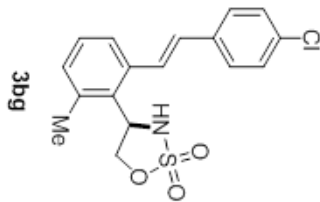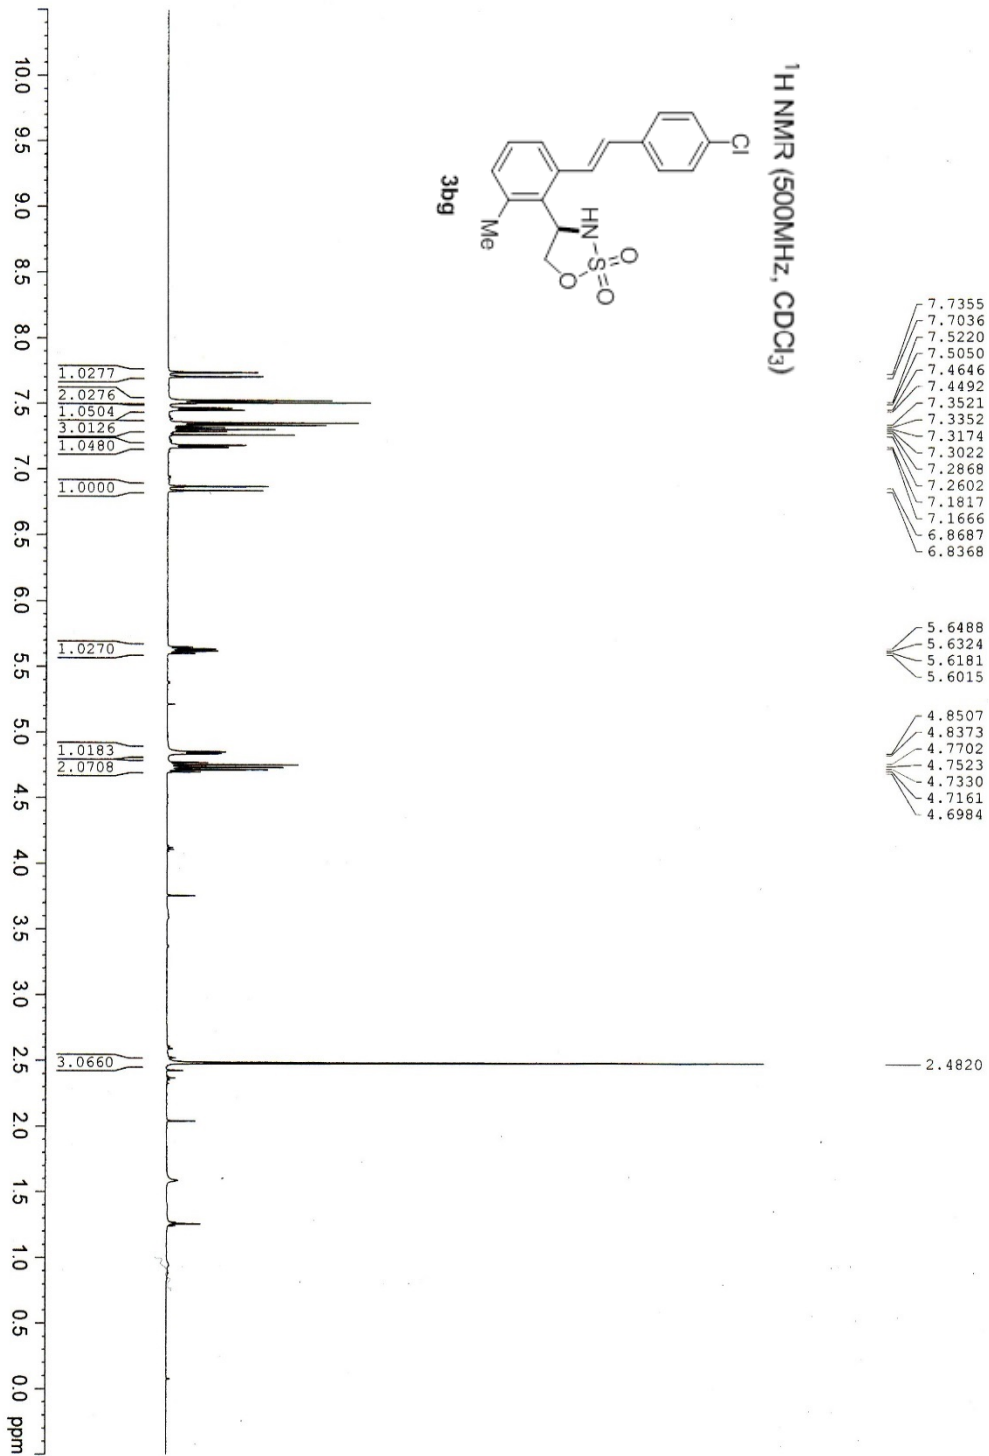



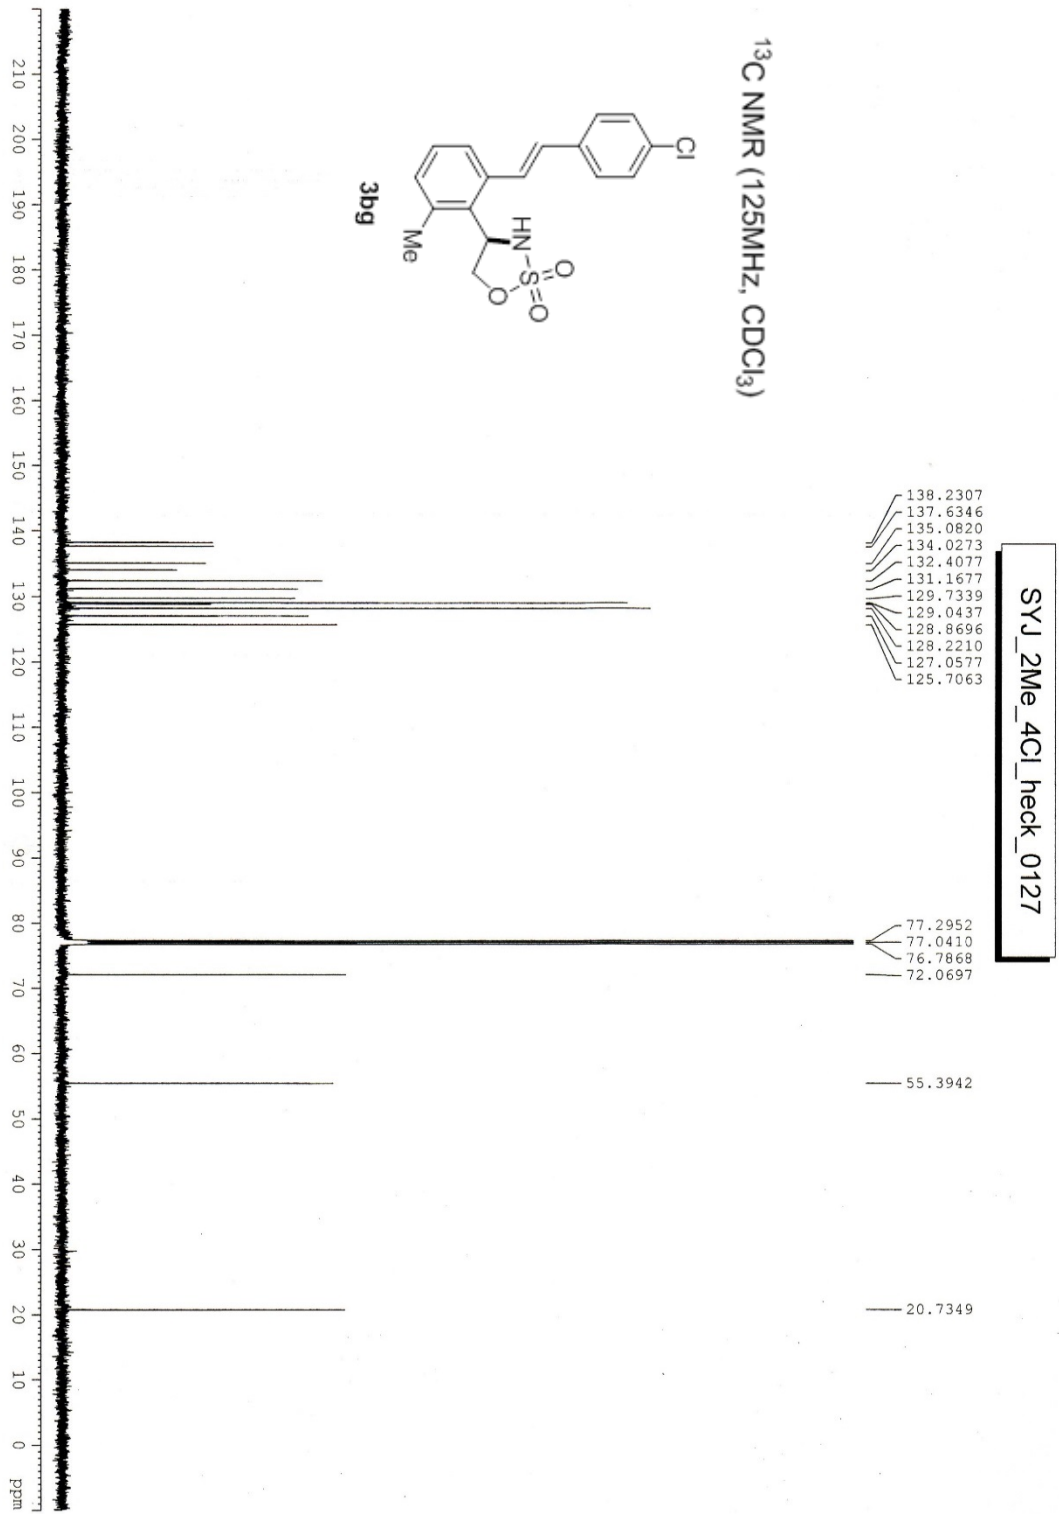

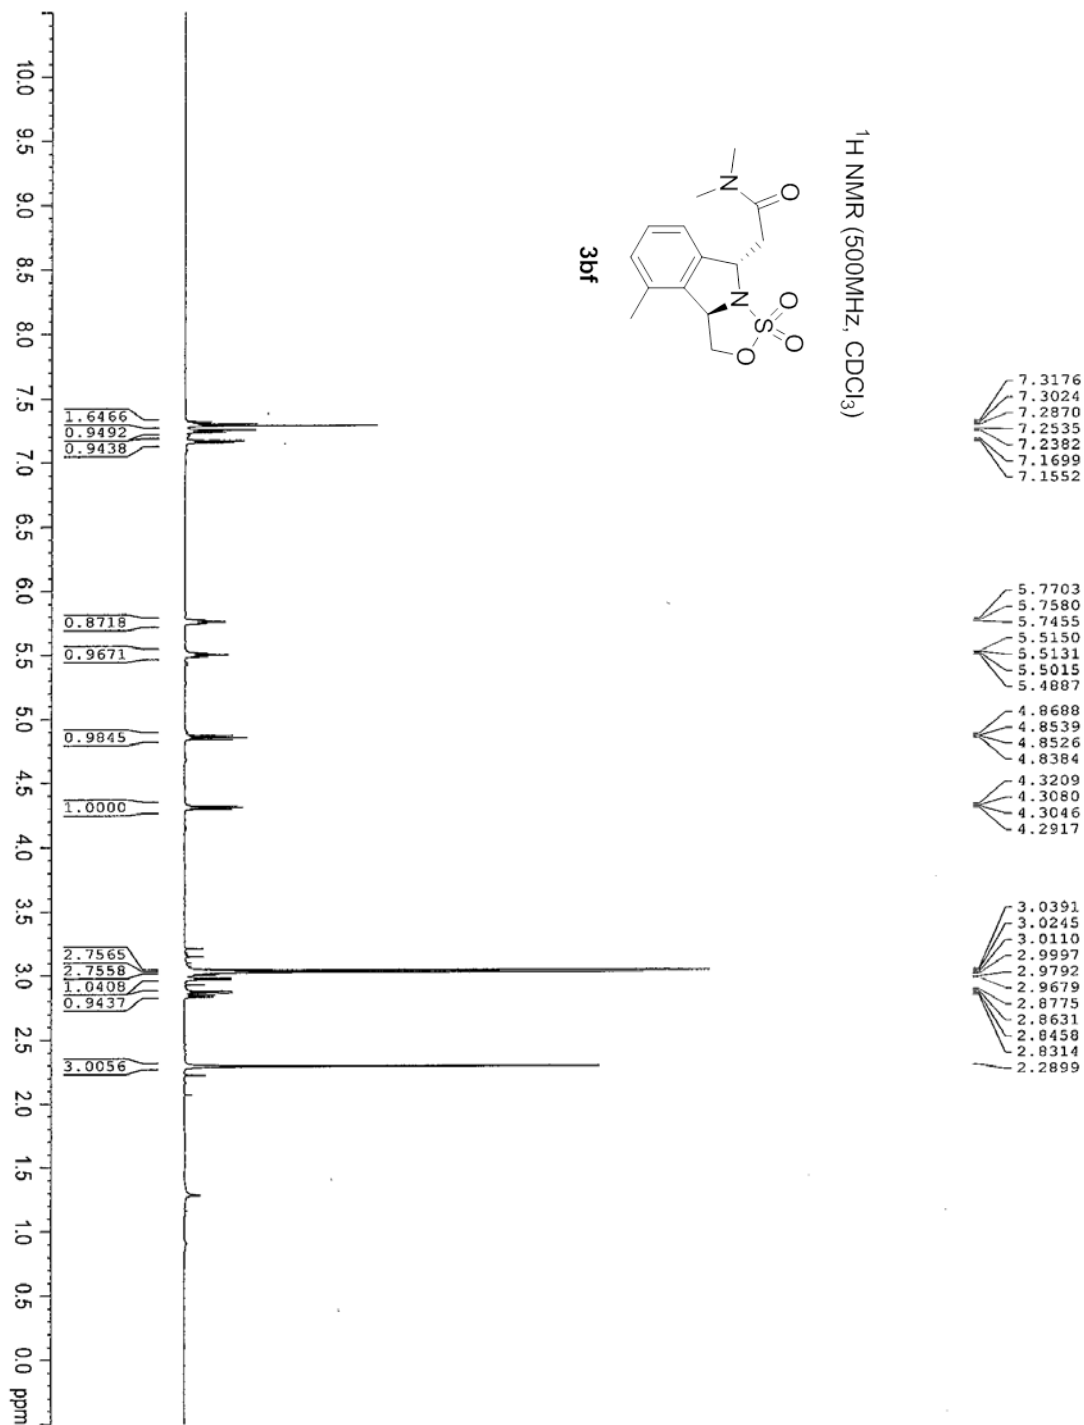

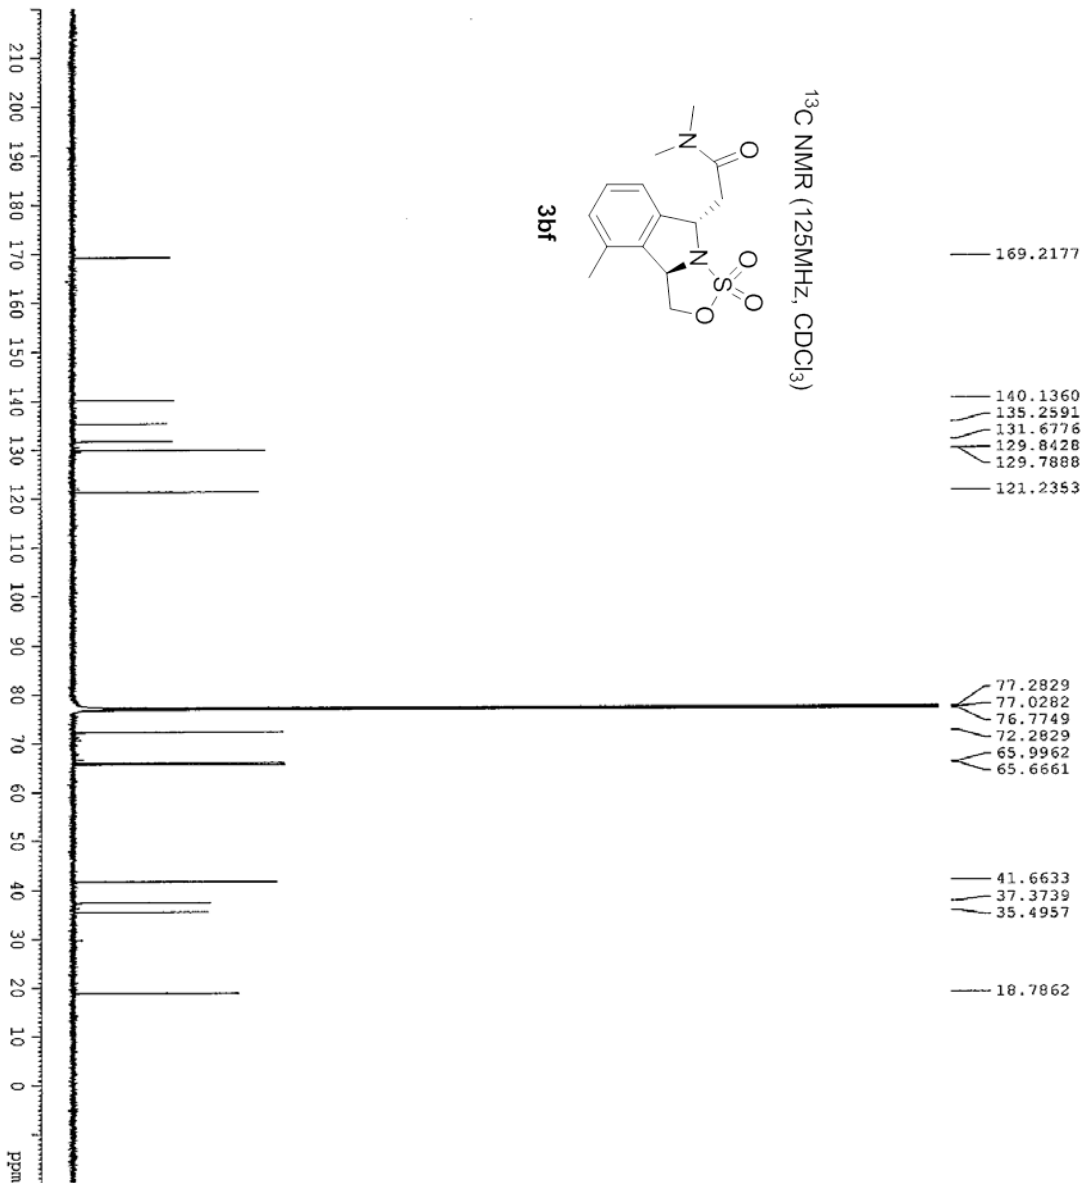

NAME SSM\_160118\_amide\_cc  
 EXPNO 1  
 PROCNO 1  
 Date\_ 20160118  
 Time\_ 22.24  
 INSTRUM 5 mm DUL 13C-1  
 PROSHD spect  
 PULPROG zgpg30  
 TD 32768  
 CDCl3  
 SOLVENT CDCl3  
 NS 5000  
 DS 2  
 SWH 30303.031 Hz  
 FIDRES 0.924775 Hz  
 AQ 0.5407385 sec  
 RG 161.3  
 DW 16.500 usec  
 DE 6.00 usec  
 TE 297.6 K  
 D1 2.00000000 sec  
 D11 0.03000000 sec  
 TDO 1

===== CHANNEL f1 =====  
 NUCl 13C  
 P1 8.00 usec  
 PL1 1.40 dB  
 PL1W 70.60439301 W  
 SFO1 125.7703661 MHz

===== CHANNEL f2 =====  
 CPDPRG2 waitz16  
 NUCl 1H  
 PCPD2 100.00 usec  
 PL2 -1.90 dB  
 PL12 16.00 dB  
 PL13 19.00 dB  
 EL2W 27.23316002 W  
 PL12W 0.44167015 W  
 PL13W 0.22135943 W  
 SFO2 500.1320005 MHz  
 SI 32768  
 SF 125.7577890 MHz  
 MDW EM  
 SSB 0  
 LB 1.00 Hz  
 GB 0  
 PC 1.40

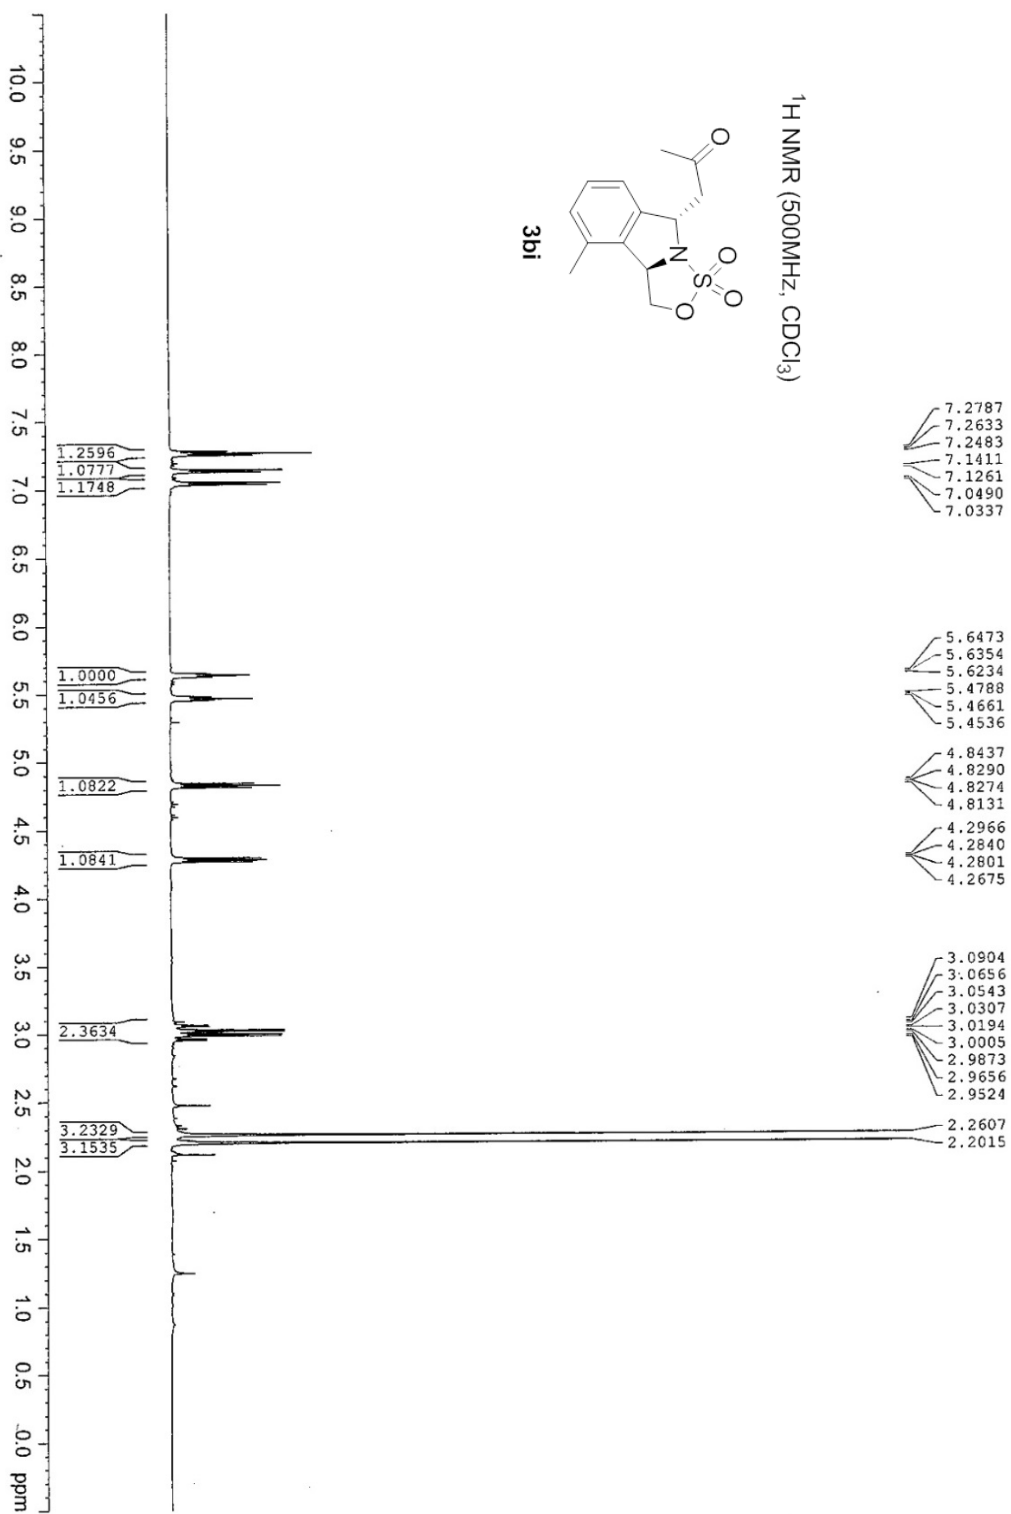

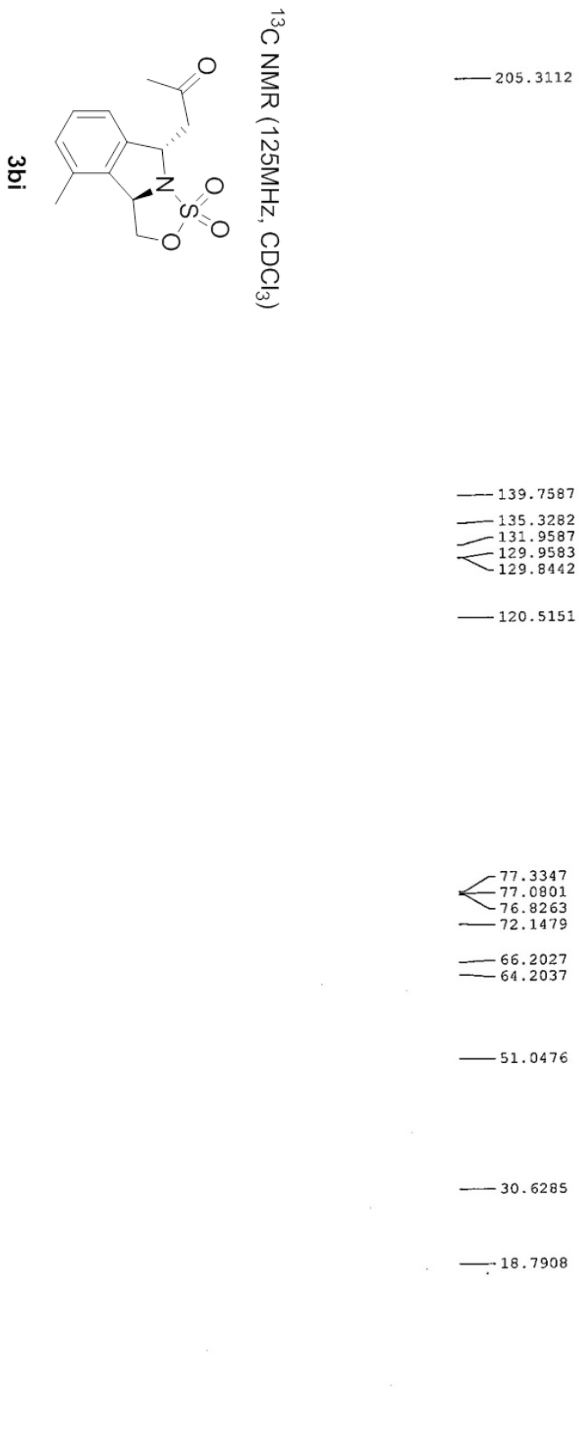

SYJ-2Me-MVK-II-pure-0120

- 7.2601
- 7.2147
- 7.1994
- 7.1842
- 7.0877
- 7.0722
- 7.0570
- 7.0438
- 7.0293
- 5.6080
- 5.5918
- 5.5760
- 5.5598
- 4.7116
- 4.6946
- 4.6779
- 4.6176
- 4.6007
- 4.5836
- 3.1561
- 3.1473
- 3.1365
- 3.1276
- 3.1206
- 3.0994
- 3.0782
- 3.0705
- 3.0582
- 3.0508
- 2.9521
- 2.9444
- 2.9333
- 2.9160
- 2.9053
- 2.8406
- 2.8297
- 2.8207
- 2.8100
- 2.8009
- 2.4856
- 2.1228

<sup>1</sup>H NMR (500MHz, CDCl<sub>3</sub>)

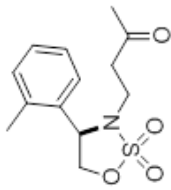

3bi'

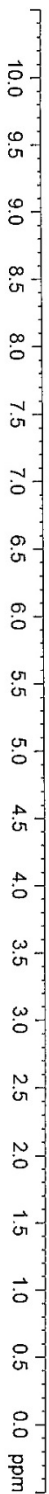

SYJ\_2Me\_MVK\_II\_pure\_0119

<sup>13</sup>C NMR (500MHz, CDCl<sub>3</sub>)

3bi

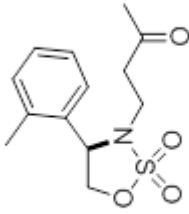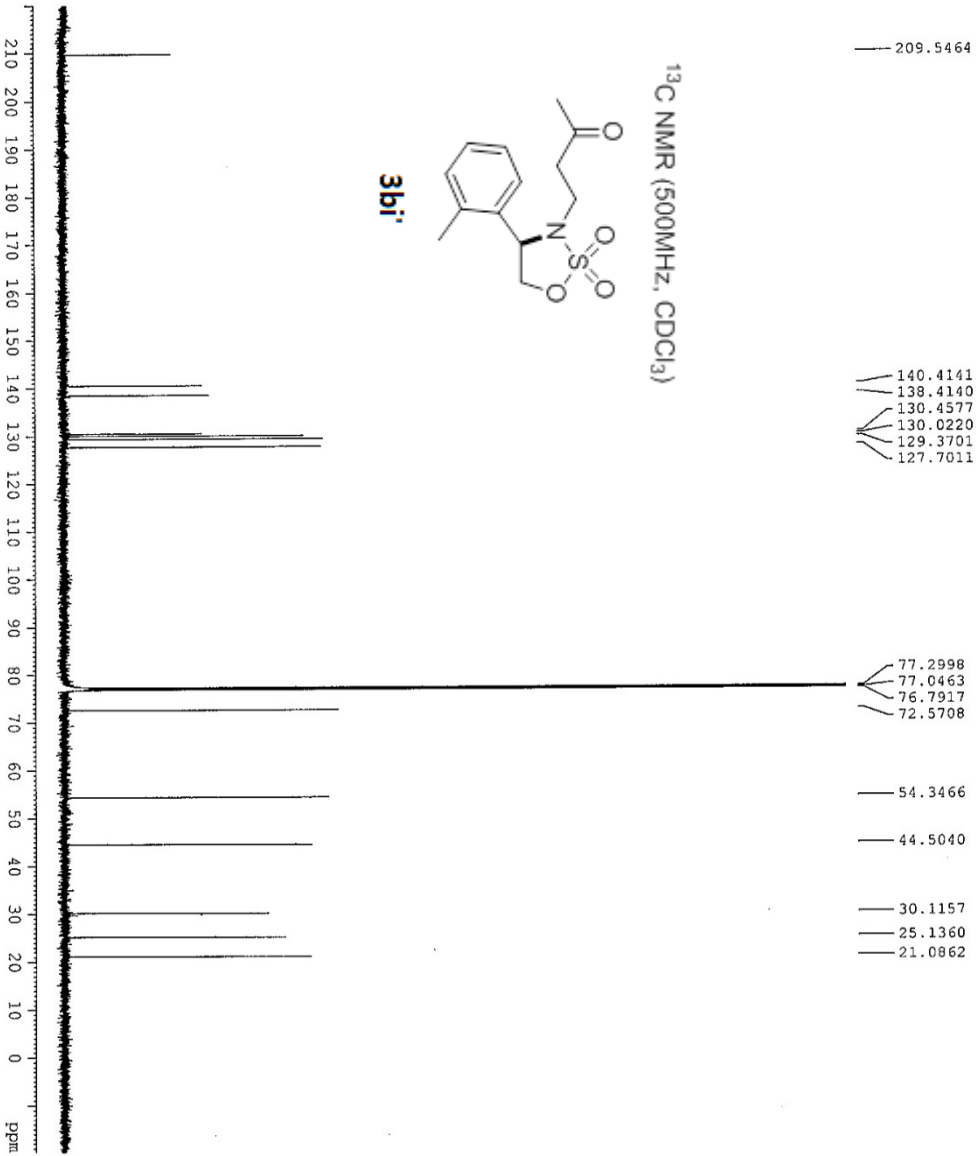

209.5464  
140.4141  
138.4140  
130.4577  
130.0220  
129.3701  
127.7011

77.2998  
77.0463  
76.7917  
72.5708

54.3466

44.5040

30.1157

25.1360

21.0862

```

NAME          SYJ_2Me_MVK_II_pure_0119
EXPNO         1
PROCNO        1
Date_         20160120
Time          10.12
INSTRUM       spect
PROBHD        5 mm DUL 13C-1
PULPROG       zgpg30
TD            32768
SOLVENT       CDCl3
NS            1000
DS            1
SWH           30303.031 Hz
FIDRES       0.924775 Hz
AQ           0.5407385 sec
RG           574.7
NR           16.500 usec
DE           6.00 usec
TE           295.3 K
D1           2.00000000 sec
D11          0.03000000 sec
TD0          1

===== CHANNEL f1 =====
NUC1          13C
P1            8.00 usec
PL1          1.40 dB
PL1W         70.60439301 W
SFO1         125.7703661 MHz

===== CHANNEL f2 =====
CPDPRG2      waltz16
NUC2          1H
P2            100.00 usec
PL2          19.00 dB
PL2W         16.300
PL13         19.00 dB
PL14         27.23316012 W
PL15W        0.44167015 W
PL16W        0.22135943 W
SFO2         500.1320005 MHz
SI           32768
SF           125.7577890 MHz
WDW          EM
SSB          0
LB           1.00 Hz
GB           0
FC           1.40
    
```

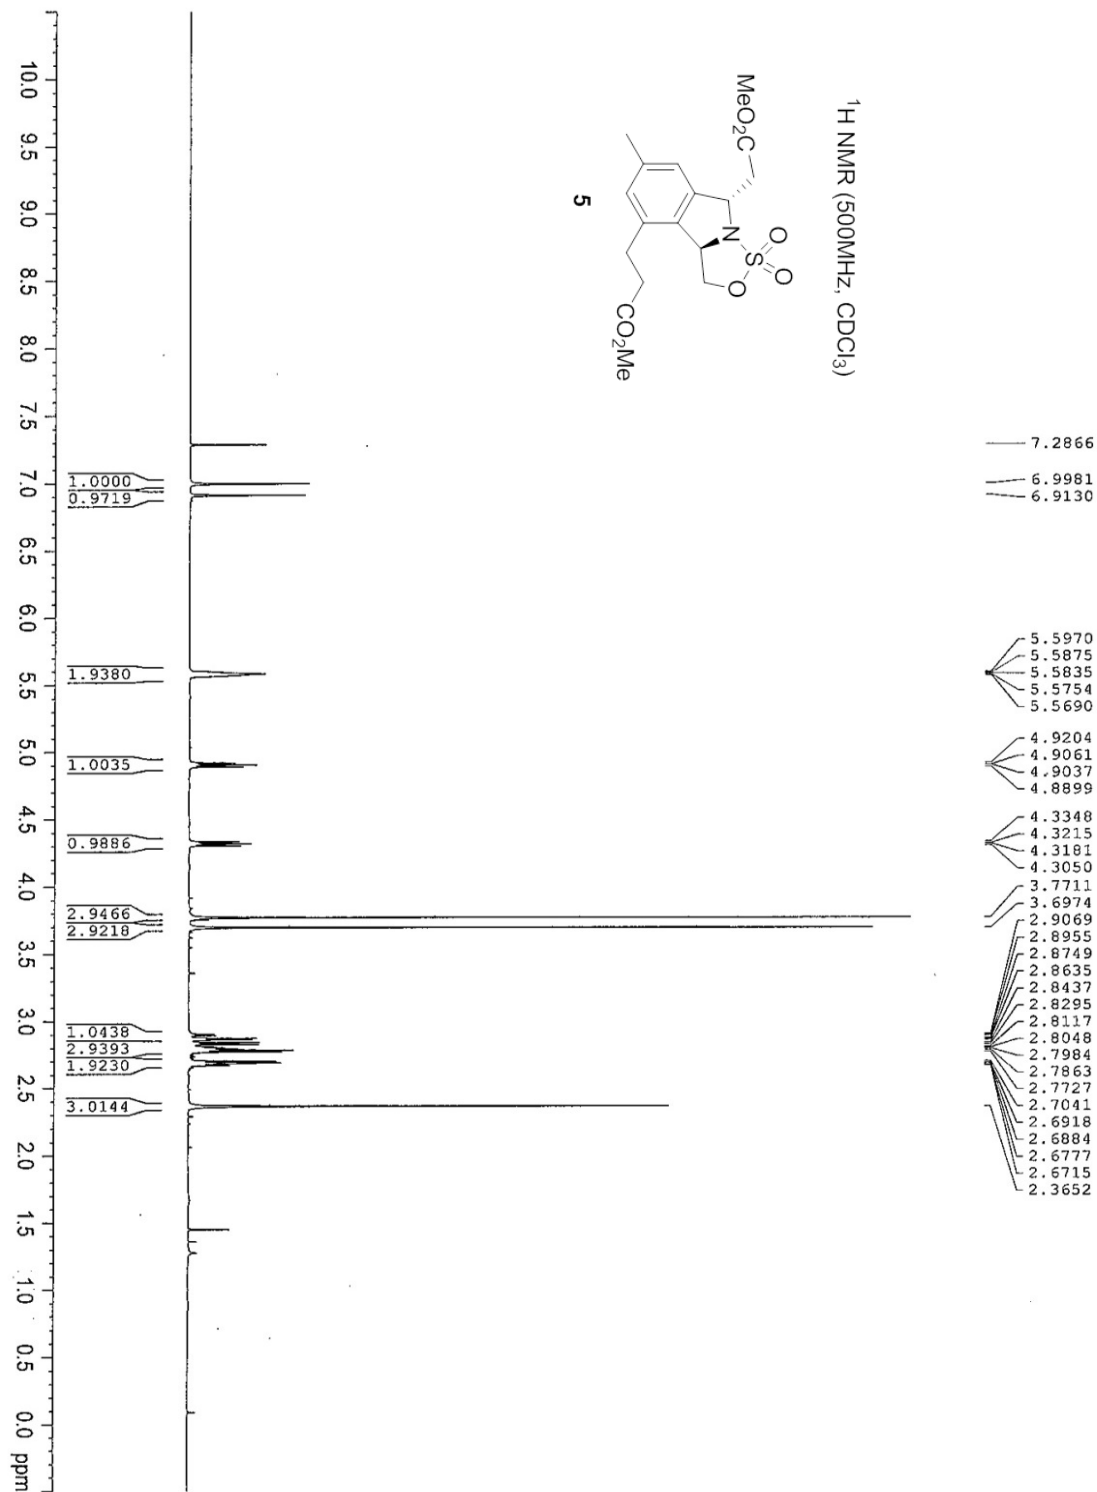



172.6205  
170.3327  
140.3284  
139.8555  
134.5685  
132.4969  
129.1549  
121.5168

72.7420  
66.1557  
64.4857  
52.0047  
51.9278  
42.2844  
34.0076  
27.4565  
21.4328

<sup>13</sup>C NMR (125MHz, CDCl<sub>3</sub>)

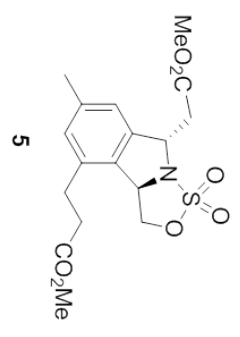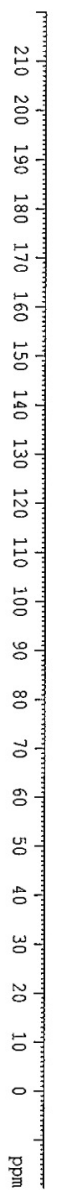

```

NAME SSM_151030_Hydrogenation
EXPNO 2
PROCNO 1
Date_ 20151030
Time_ 19:55
INSTRUM spect
PROBHD 5 mm DUL 13C-Q1
PULPROG zgpg30
TD 32768
SOLVENT CDCl3
NS 3000
DS 2
SWH 30303.031 Hz
FIDRES 0.924775 Hz
AQ 0.5407385 sec
RG 3251
DE 16.500 usec
TE 298.7 K
D1 2.00000000 sec
D11 0.03000000 sec
TD0 1

===== CHANNEL f1 =====
NUC1 13C
P1 8.00 usec
PL1 1.40 dB
PL1W 70.60439301 W
SFO1 125.7703661 MHz

===== CHANNEL f2 =====
MAGIz16
NUC2 1H
PCPD2 100.00 usec
PL2 -1.90 dB
PL12 18.00 dB
PL13 19.00 dB
PL2W 27.23316002 W
PL12W 0.44167015 W
PL13W 0.22135943 W
SFO2 500.1320005 MHz
SI 32768
SF 125.757890 MHz
WDW EM
SSB 0
LB 1.00 Hz
GB 0
PC 1.40

```

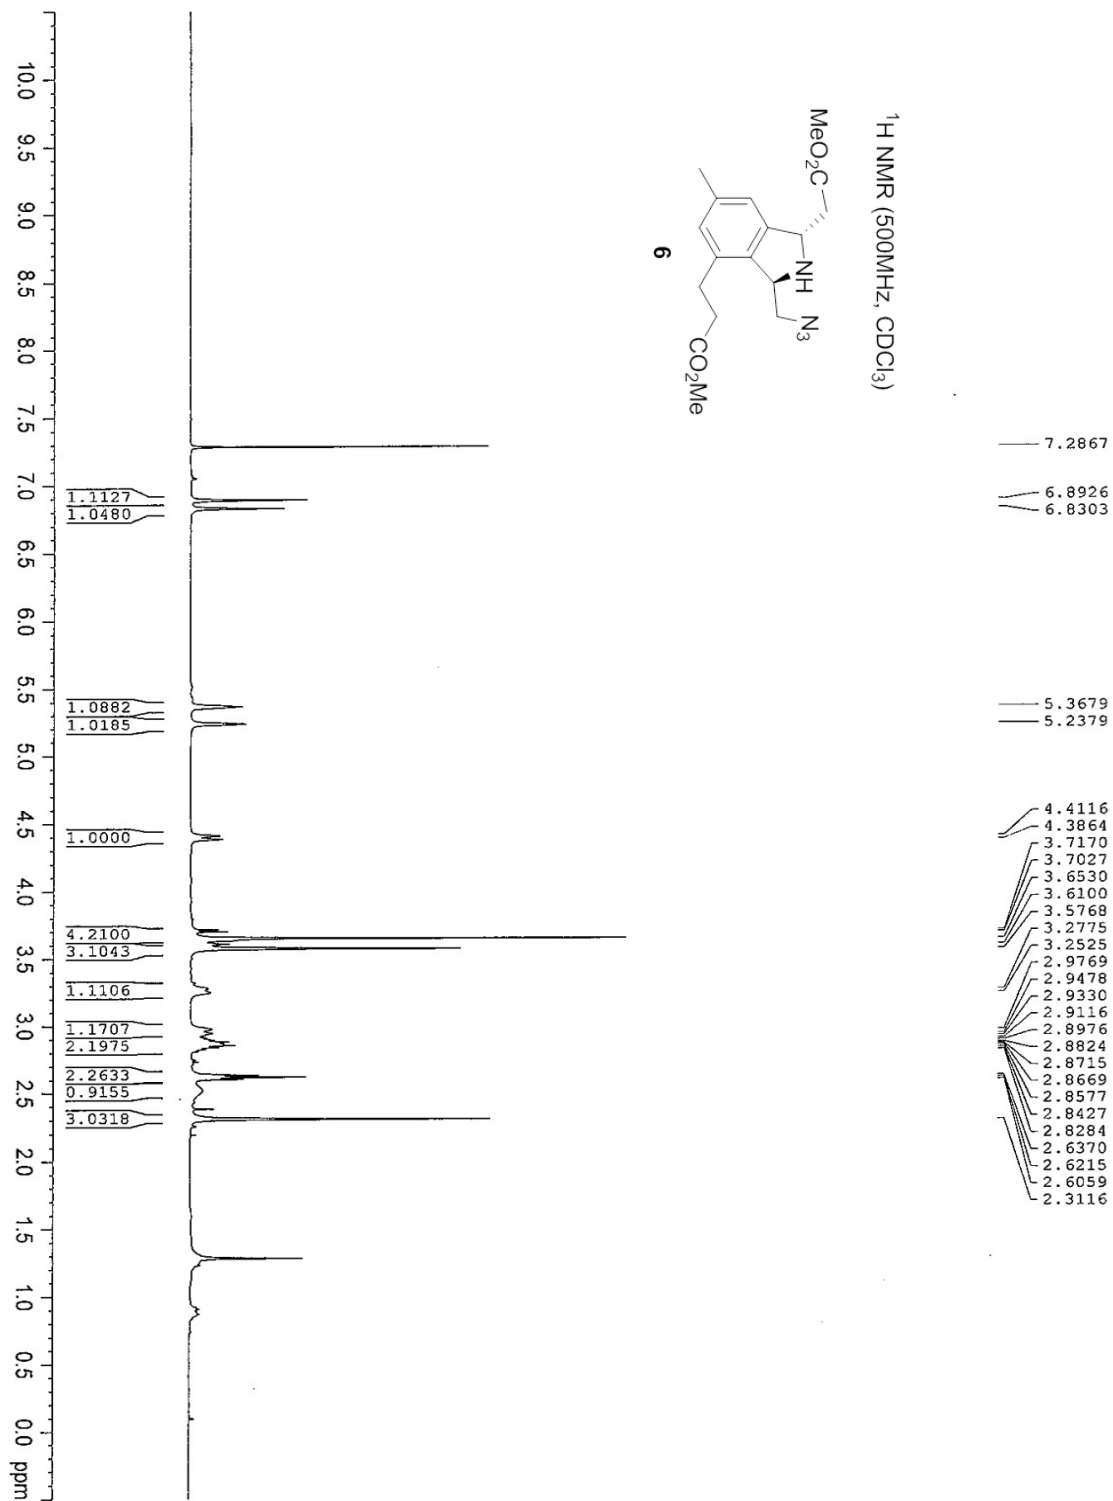

174.2041  
173.0619  
142.5533  
138.5201  
134.4075  
132.7794  
128.4685  
121.1615  
77.2679  
77.0133  
76.7600  
64.3456  
60.7042  
53.4484  
51.7647  
51.6688  
41.2247  
34.4991  
27.0680  
21.4404

<sup>13</sup>C NMR (125MHz, CDCl<sub>3</sub>)

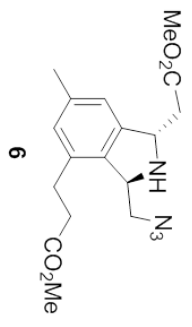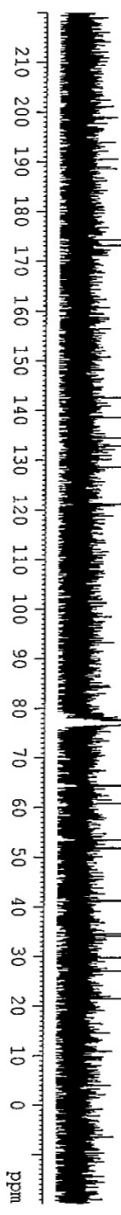

```

NAME          SSN_151102_hy_N3_P
EXPNO         1
PROCNO        1
Date_         20151102
Time          21.07
INSTRUM       spect
PROBHD        5 mm DUE 13C-1
PULPROG       zgpg30
TD            32768
SOLVENT       CDCl3
NS            3000
DS            2
SMH           30303.031 Hz
FIDRES        0.924775 Hz
AQ            0.5407385 sec
RG            5792.6
DM            16.500 usec
DE            6.00 usec
TE            300.0 K
D1            2.00000000 sec
D11           0.03000000 sec
TD0           1

===== CHANNEL f1 =====
NUC1          13C
P1            8.00 usec
PL1           1.40 dB
PL1W          70.60439301 W
SFO1          125.7703661 MHz

===== CHANNEL f2 =====
CPDPRG2      waltz16
NUC2          1H
PCPD2        100.00 usec
PL2           -1.90 dB
PL12         16.00 dB
PL13         19.00 dB
PL1W         27.23318002 W
PL12W        0.44167015 W
PL13W        0.22135943 W
SFO2         500.1320005 MHz
SI           32768
SF           125.7577890 MHz
WDW          EM
SSB          0
LB           1.00 Hz
GB           0
PC           1.40
  
```

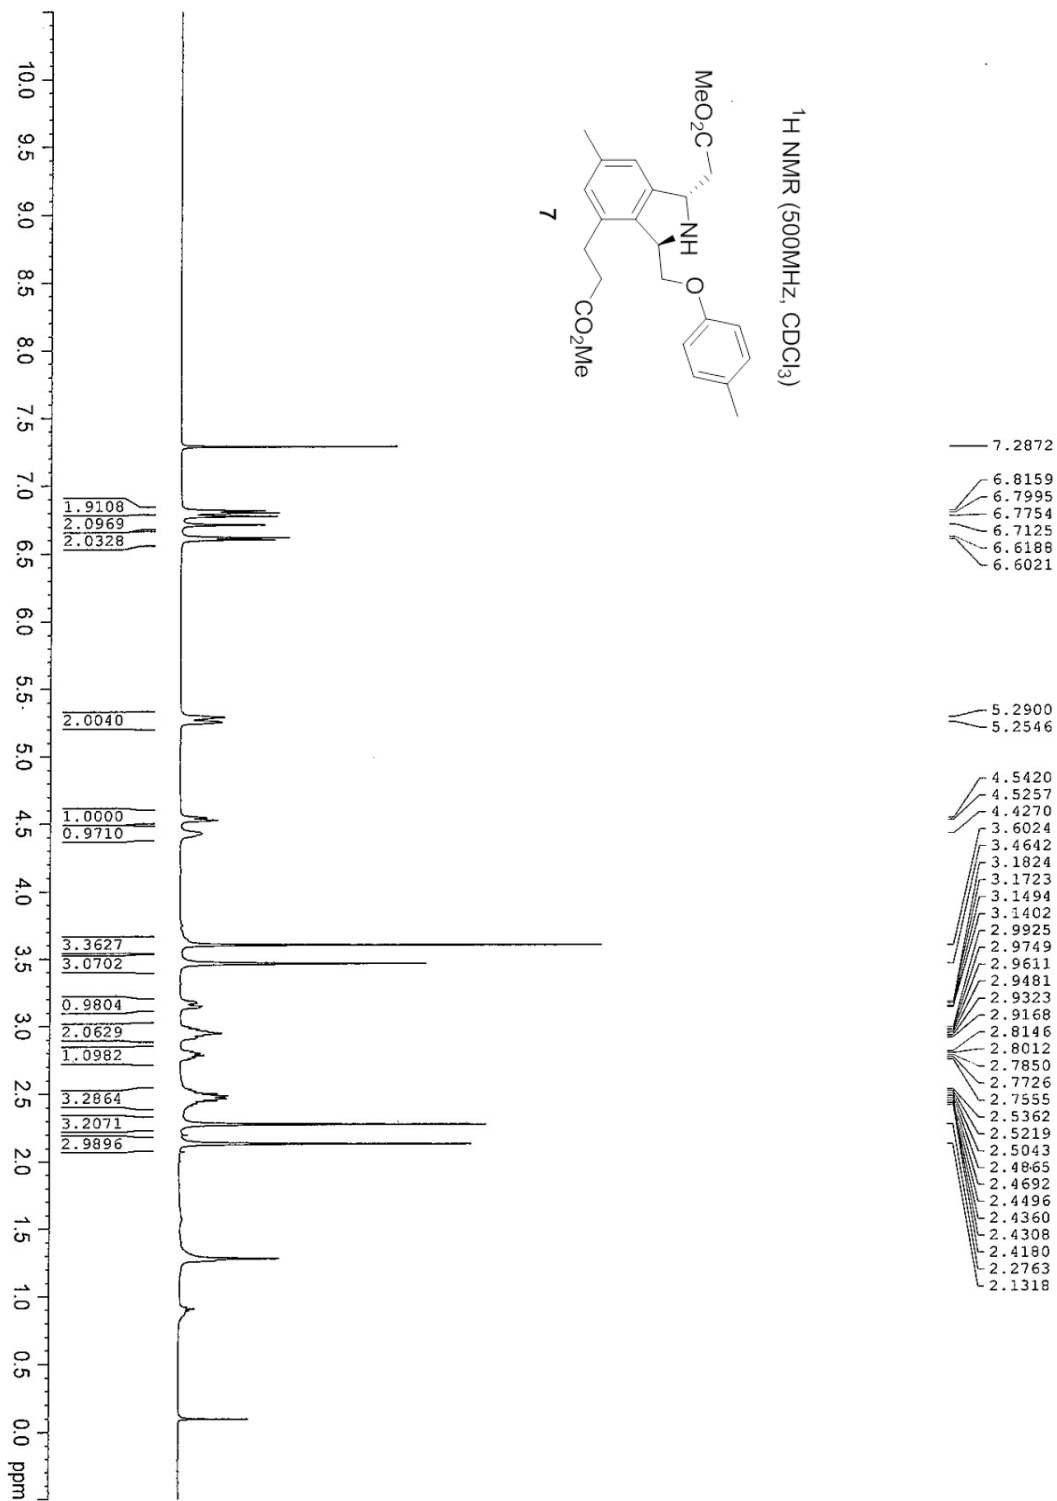

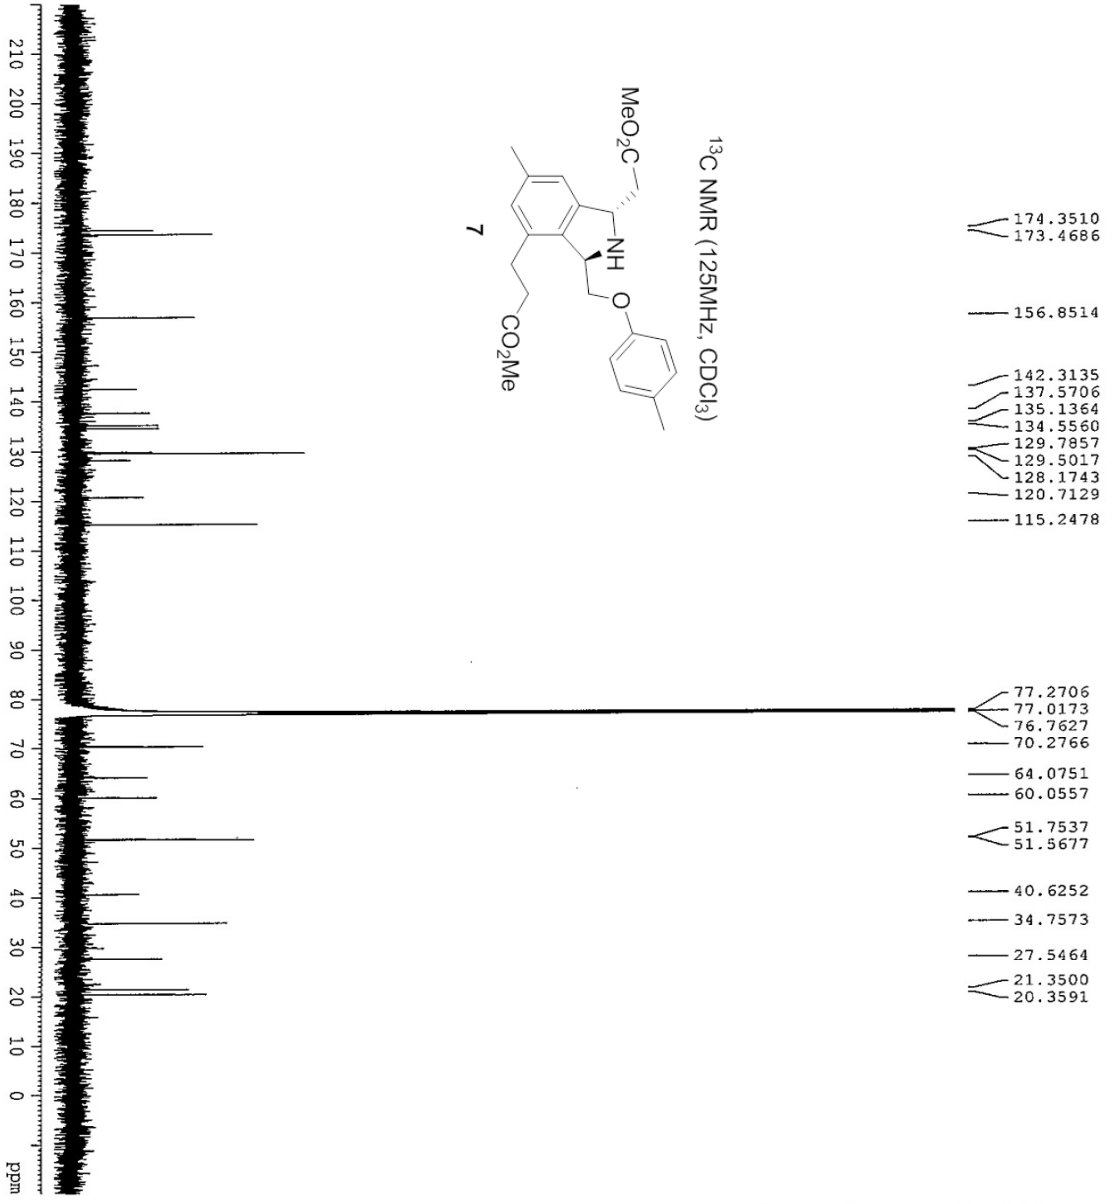

- 174.3510
- 173.4686
- 156.8514
- 142.3135
- 137.5706
- 135.1364
- 134.5560
- 129.7857
- 129.5017
- 128.1743
- 120.7129
- 115.2478
- 77.2706
- 77.0173
- 76.7627
- 70.2766
- 64.0751
- 60.0557
- 51.7537
- 51.5677
- 40.6252
- 34.7573
- 27.5464
- 21.3500
- 20.3591

```

NAME          SSM_151120_cresol_D
EXPNO         1
PROCNO        1
Date_         20151121
Time          1.05
INSTRUM       spect
PROBHD        5 mm DUL 13C-1
PULPROG       zgpg30
TD            32768
SOLVENT       CDCl3
NS            10000
DS            2
SWH           30303.031 Hz
FIDRES        0.924775 Hz
AQ            0.5407385 sec
RG            2298.8
DE            16.500 usec
TE            298.4 K
D1            2.00000000 sec
D11           0.03000000 sec
TD0           1

===== CHANNEL f1 =====
NUC1          13C
P1            8.00 usec
PL1           1.40 dB
PL1W          70.60439301 W
SFO1          125.7703661 MHz

===== CHANNEL f2 =====
CPDPRG2      waltz16
NUC2          1H
PCPD2        100.00 usec
PL2          -1.90 dB
PL12         16.00 dB
PL13         19.00 dB
PL1W         27.23316002 W
PL1Z         0.44167015 W
PL13W        0.22135943 W
SFO2         500.1320005 MHz
SI           32768
SF           125.7577890 MHz
WDW           EM
SSB           0
LB           1.00 Hz
GB           0
PC           1.40
  
```

► **Sample name: 3a**

► **Analysis condition: Chiralpak IC, 40%EtOH/n-hexane, 1.0ml/min, 215nm**

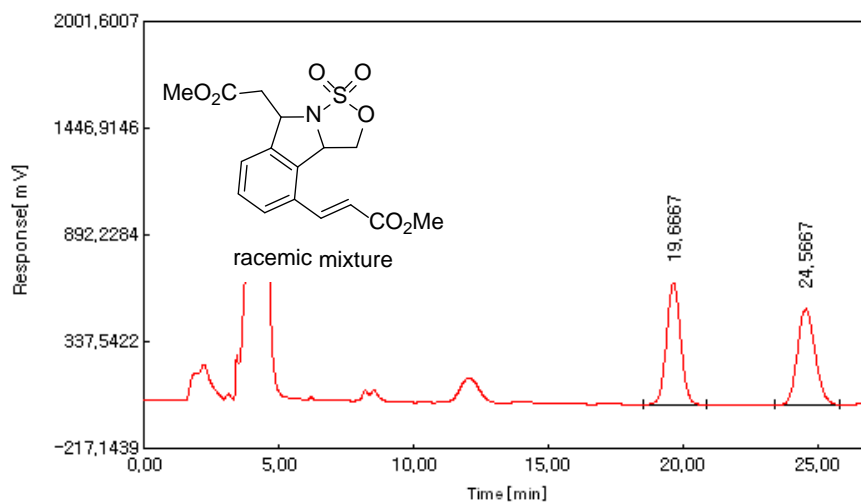

| Peak # | RT[min] | Area[mV*s] | BL | Wide[sec] | Area%   |
|--------|---------|------------|----|-----------|---------|
| 1      | 19.6667 | 24104.2025 | BB | 141.0000  | 50.5815 |
| 2      | 24.5667 | 23549.9903 | BB | 145.0000  | 49.4185 |
| Total  |         | 47654.1953 |    |           |         |

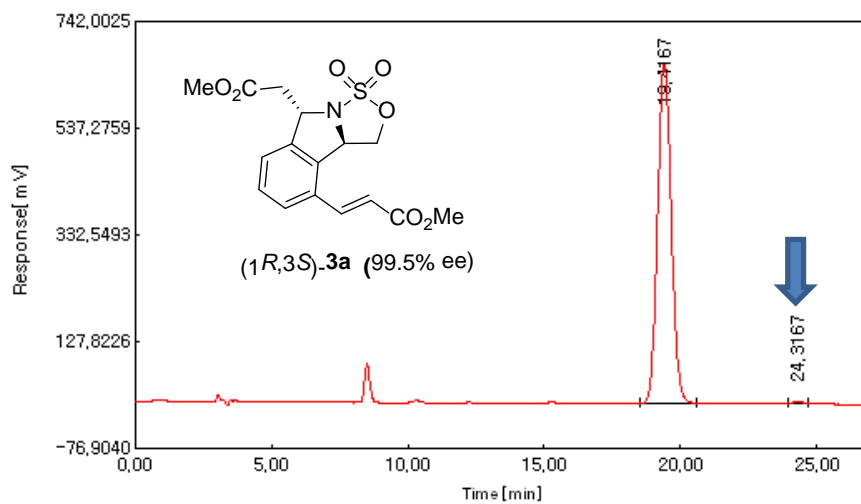

| Peak # | RT[min] | Area[mV*s] | BL | Wide[sec] | Area%   |
|--------|---------|------------|----|-----------|---------|
| 1      | 19.4167 | 23580.0859 | BB | 122.0000  | 99.7423 |
| 2      | 24.3167 | 60.9137    | FF | 47.0000   | 0.2577  |
| Total  |         | 23641.0000 |    |           |         |

► **Sample name: 3b**

► **Analysis condition:** Chiralpak IC, 10%EtOH/n-hexane, 1.0ml/min, 215nm

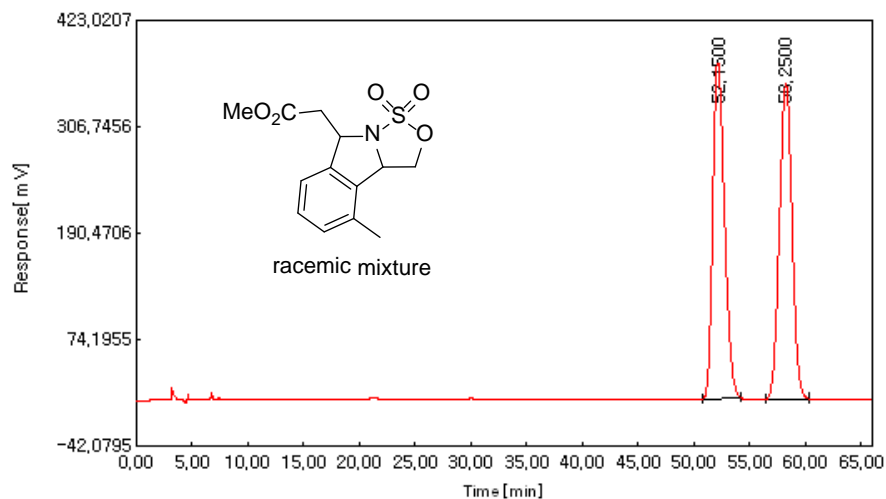

| Peak # | RT[min] | Area[mV*s] | BL | Wide[sec] | Area%   |
|--------|---------|------------|----|-----------|---------|
| 1      | 52.1500 | 27616.7729 | BB | 210.0000  | 49.9167 |
| 2      | 58.2500 | 27708.9791 | BB | 228.0000  | 50.0833 |
| Total  |         | 55325.7539 |    |           |         |

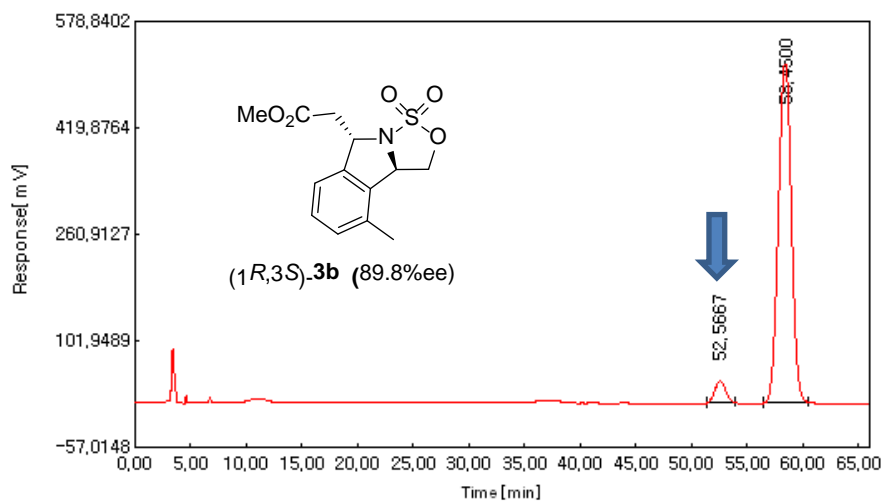

| Peak # | RT[min] | Area[mV*s] | BL | Wide[sec] | Area%   |
|--------|---------|------------|----|-----------|---------|
| 1      | 52.5667 | 2251.4052  | BB | 155.0000  | 5.1048  |
| 2      | 58.4500 | 41852.0271 | BB | 241.0000  | 94.8952 |
| Total  |         | 44103.4336 |    |           |         |

► **Sample name: 3c**

► **Analysis condition:** Chiralpak IC, 40%EtOH/n-hexane, 1.0ml/min, 215nm

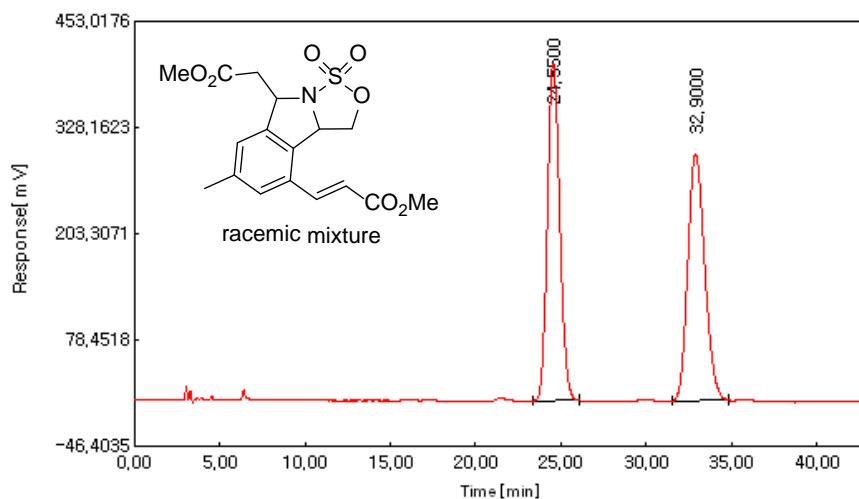

| Peak # | RT[min] | Area[mV*s] | BL | Wide[sec] | Area%   |
|--------|---------|------------|----|-----------|---------|
| 1      | 24.5500 | 20700.4727 | BB | 158.0000  | 50.0223 |
| 2      | 32.9000 | 20682.0239 | BB | 198.0000  | 49.9777 |
| Total  |         | 41382.4961 |    |           |         |

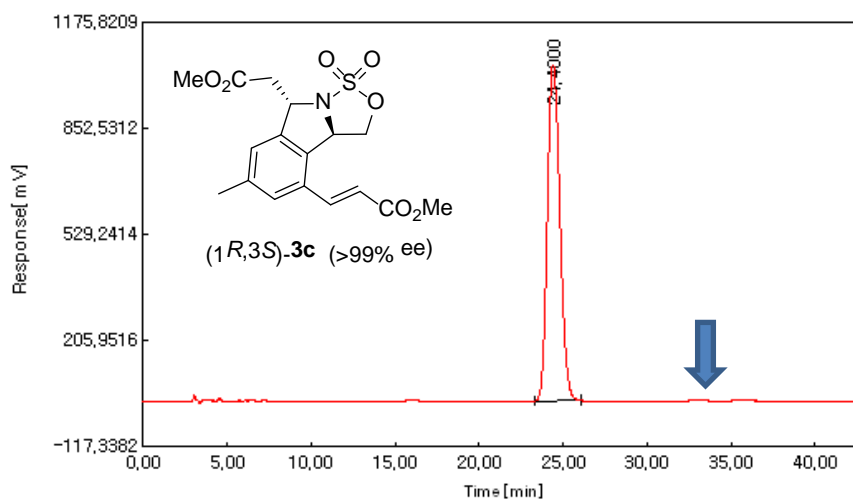

| Peak # | RT[min] | Area[mV*s] | BL | Wide[sec] | Area%    |
|--------|---------|------------|----|-----------|----------|
| 1      | 24.4000 | 54905.2761 | BB | 165.0000  | 100.0000 |
| Total  |         | 54905.2773 |    |           |          |



► **Sample name: 3d**

► **Analysis condition: Chiralpak IC, 20%EtOH/n-hexane, 1.0ml/min, 215nm**

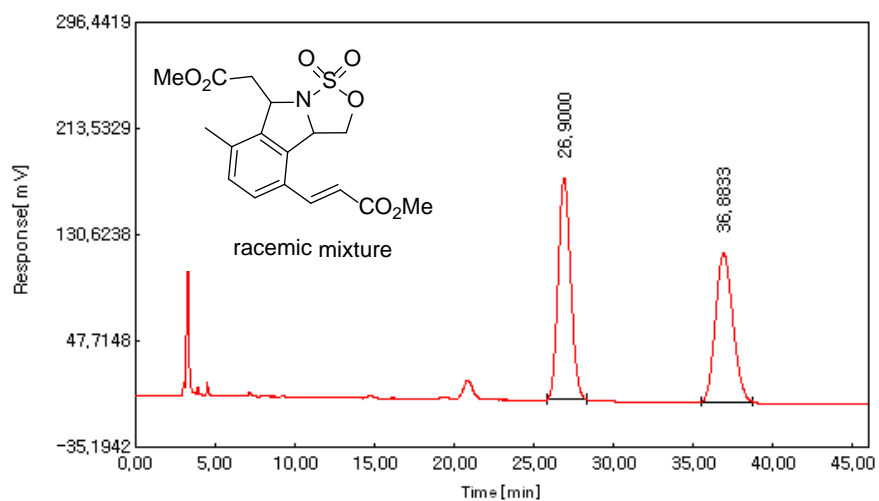

| Peak # | RT [min] | Area [mV*s] | BL | Wide [sec] | Area%   |
|--------|----------|-------------|----|------------|---------|
| 1      | 26.9000  | 9798.4882   | BB | 152.0000   | 51.8215 |
| 2      | 36.8833  | 9109.6646   | BB | 196.0000   | 48.1785 |
| Total  |          | 18908.1523  |    |            |         |

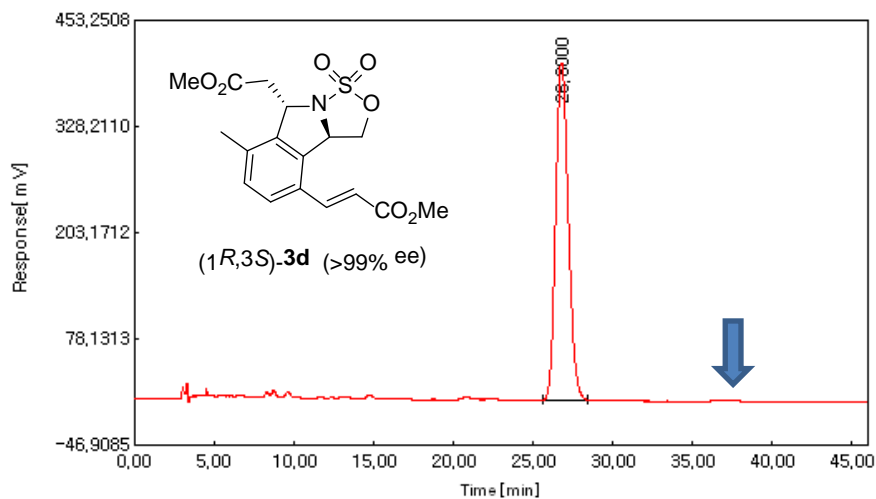

| Peak # | RT [min] | Area [mV*s] | BL | Wide [sec] | Area%    |
|--------|----------|-------------|----|------------|----------|
| 1      | 26.8000  | 22634.8903  | BB | 169.0000   | 100.0000 |
| Total  |          | 22634.8906  |    |            |          |

► **Sample name: 3e**

► **Analysis condition: Chiralpak IC, 50%EtOH/n-hexane, 1.1ml/min, 215nm**

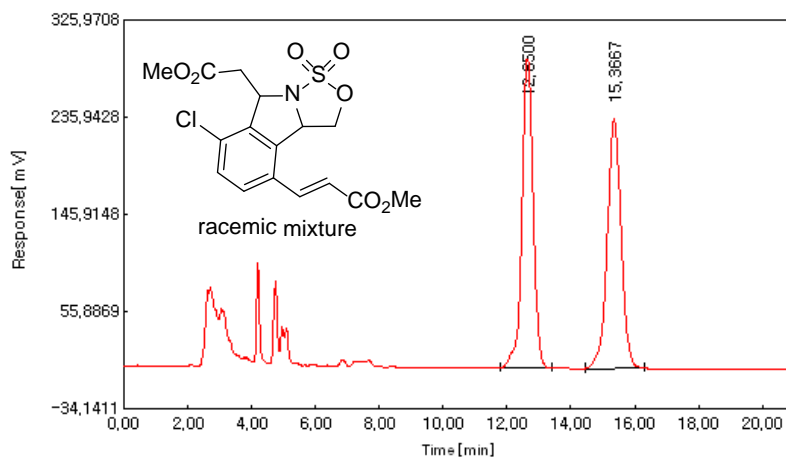

| Peak # | RT[min] | Area[mV*s] | BL | Wide[sec] | Area%   |
|--------|---------|------------|----|-----------|---------|
| 1      | 12.6500 | 7235.8937  | BB | 96.0000   | 50.0116 |
| 2      | 15.3667 | 7232.5439  | BB | 112.0000  | 49.9884 |
| Total  |         | 14468.4375 |    |           |         |

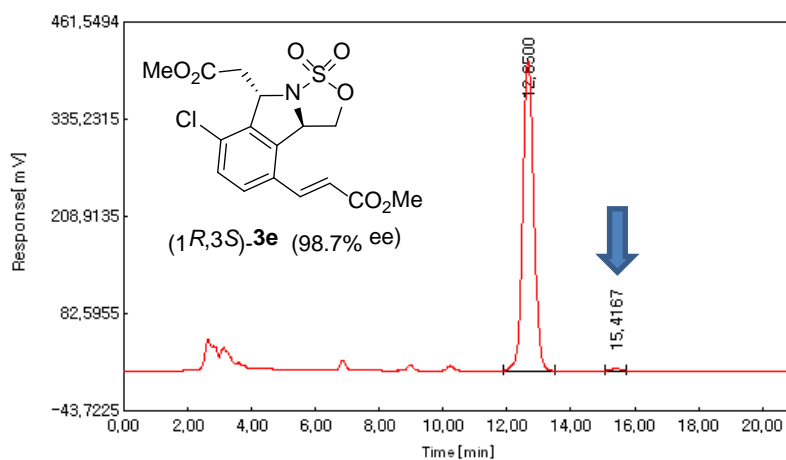

| Peak # | RT[min] | Area[mV*s] | BL | Wide[sec] | Area%   |
|--------|---------|------------|----|-----------|---------|
| 1      | 12.6500 | 9995.0123  | BB | 98.0000   | 99.3443 |
| 2      | 15.4167 | 65.9705    | FF | 41.0000   | 0.6557  |
| Total  |         | 10060.9834 |    |           |         |

► **Sample name: 3f**

► **Analysis condition: Chiralpak IC, 40%EtOH/n-hexane, 1.0ml/min, 215nm**

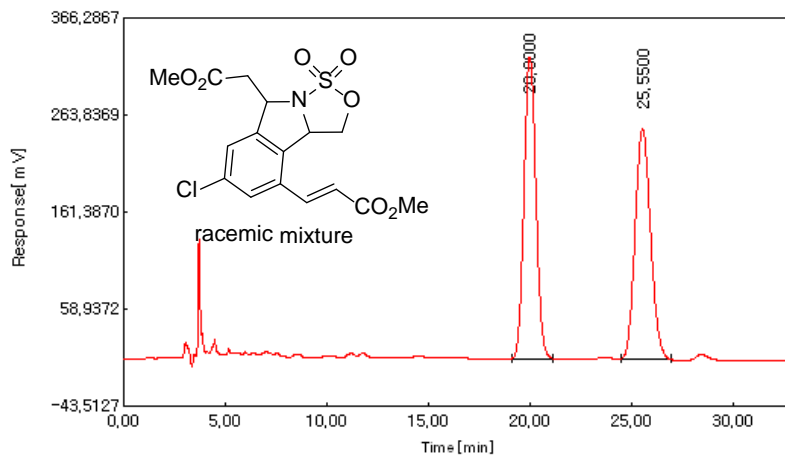

| Peak # | RT [min] | Area [mV*s] | BL | Wide [sec] | Area%   |
|--------|----------|-------------|----|------------|---------|
| 1      | 20.0000  | 13372.2393  | BB | 125.0000   | 50.1590 |
| 2      | 25.5500  | 13287.4718  | BB | 150.0000   | 49.8410 |
| Total  |          | 26659.7109  |    |            |         |

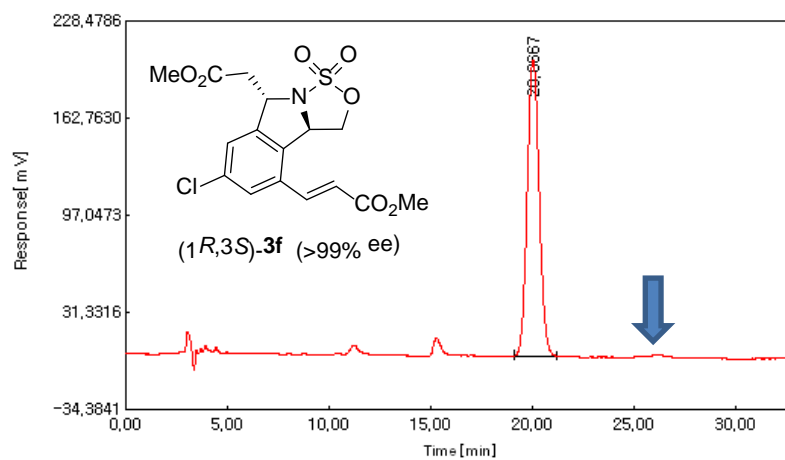

| Peak # | RT [min] | Area [mV*s] | BL | Wide [sec] | Area%    |
|--------|----------|-------------|----|------------|----------|
| 1      | 20.0667  | 8406.7910   | BB | 124.0000   | 100.0000 |
| Total  |          | 8406.7910   |    |            |          |

► **Sample name: 3g**

► **Analysis condition: Chiralpak IC, 40%EtOH/n-hexane, 1.0ml/min, 215nm**

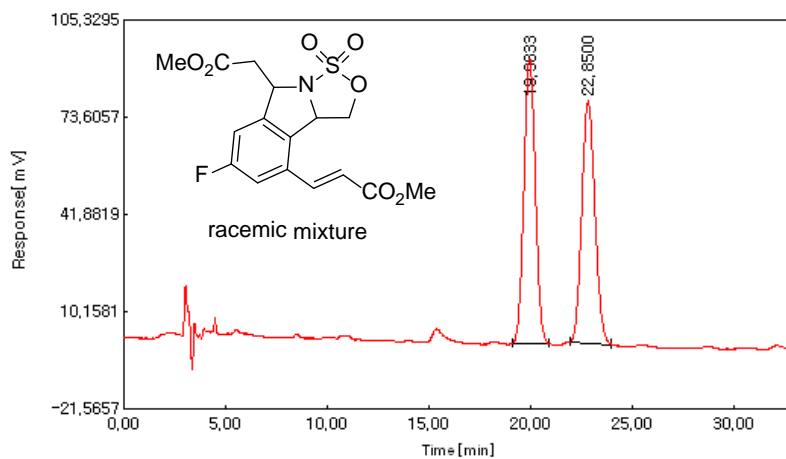

| Peak # | RT[min] | Area[mV*s] | BL | Wide[sec] | Area%   |
|--------|---------|------------|----|-----------|---------|
| 1      | 19.9833 | 3742.1226  | BB | 108.0000  | 50.4885 |
| 2      | 22.8500 | 3669.7148  | BB | 120.0000  | 49.5115 |
| Total  |         | 7411.8374  |    |           |         |

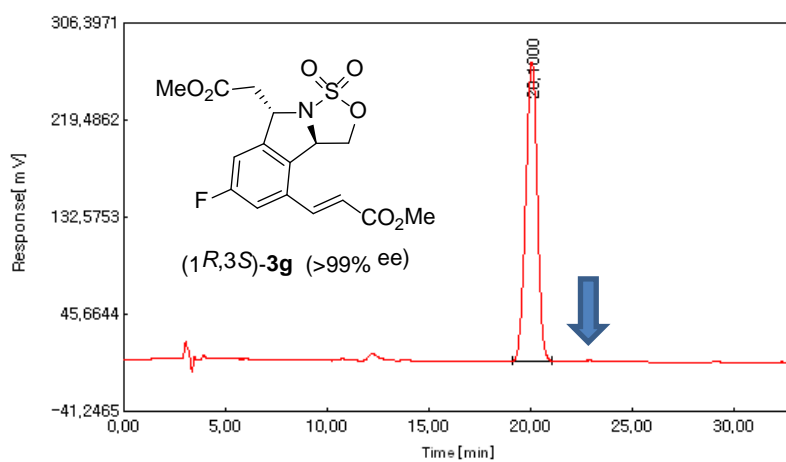

| Peak # | RT[min] | Area[mV*s] | BL | Wide[sec] | Area%    |
|--------|---------|------------|----|-----------|----------|
| 1      | 20.1000 | 10941.0685 | BB | 119.0000  | 100.0000 |
| Total  |         | 10941.0684 |    |           |          |

► **Sample name: 3h**

► **Analysis condition: Chiralcel OD-H, 30%IPA/n-hexane, 1.0ml/min, 215nm**

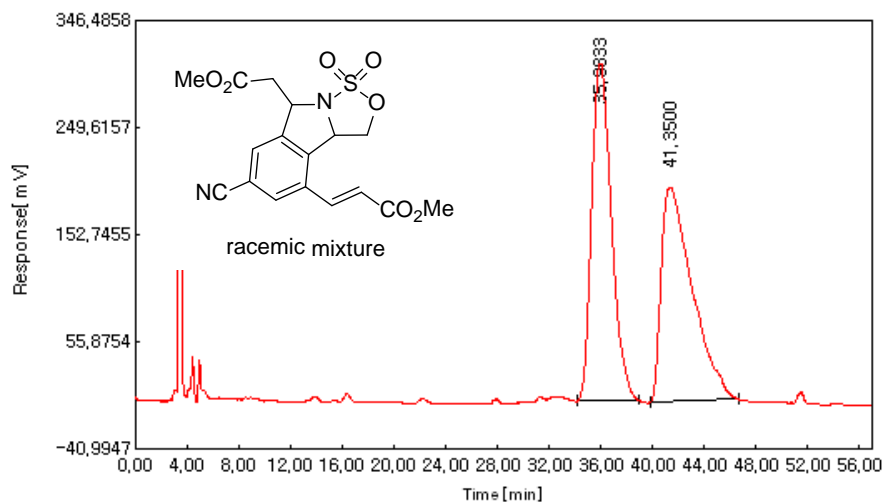

| Peak # | RT[min] | Area[mV*s] | BL | Wide[sec] | Area%   |
|--------|---------|------------|----|-----------|---------|
| 1      | 35.9833 | 33458.7592 | BB | 283.0000  | 50.0785 |
| 2      | 41.3500 | 33353.9121 | FF | 410.0000  | 49.9215 |
| Total  |         | 66812.6719 |    |           |         |

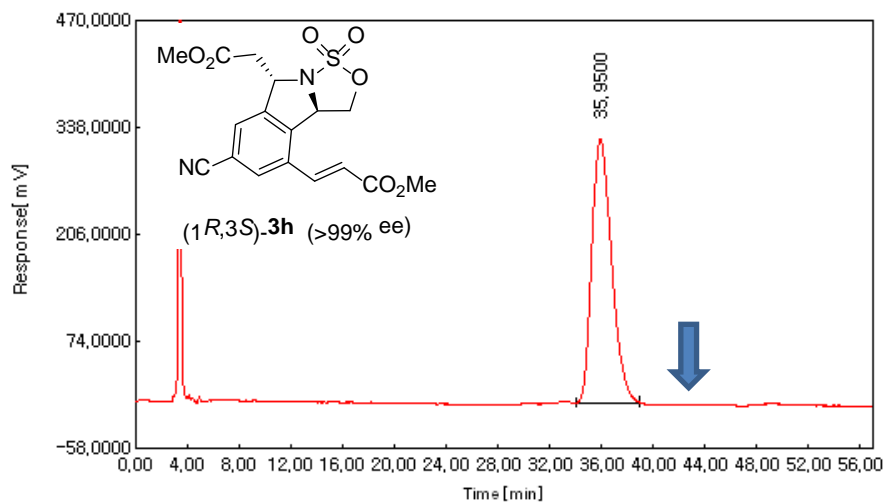

| Peak # | RT[min] | Area[mV*s] | BL | Wide[sec] | Area%    |
|--------|---------|------------|----|-----------|----------|
| 1      | 359500  | 34126.1394 | BB | 291.0000  | 100.0000 |
| Total  |         | 34126.1394 |    |           |          |

► **Sample name: 3i**

► **Analysis condition:** Chiralcel OD-H, 30% IPA/n-hexane, 1.0ml/min, 215nm

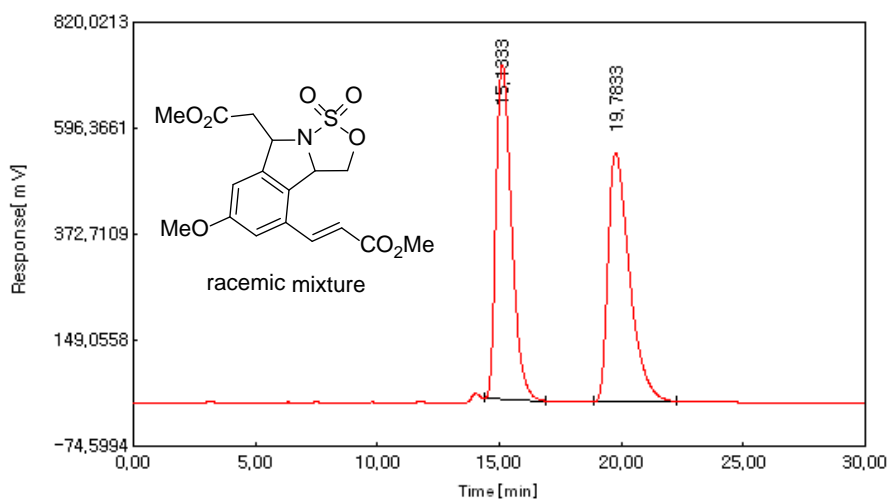

| Peak # | RT [min] | Area [mV*s] | BL | Wide [sec] | Area%   |
|--------|----------|-------------|----|------------|---------|
| 1      | 15.1333  | 32514.1144  | BB | 151.0000   | 49.4101 |
| 2      | 19.7833  | 33290.4902  | BB | 203.0000   | 50.5899 |
| Total  |          | 65804.6016  |    |            |         |

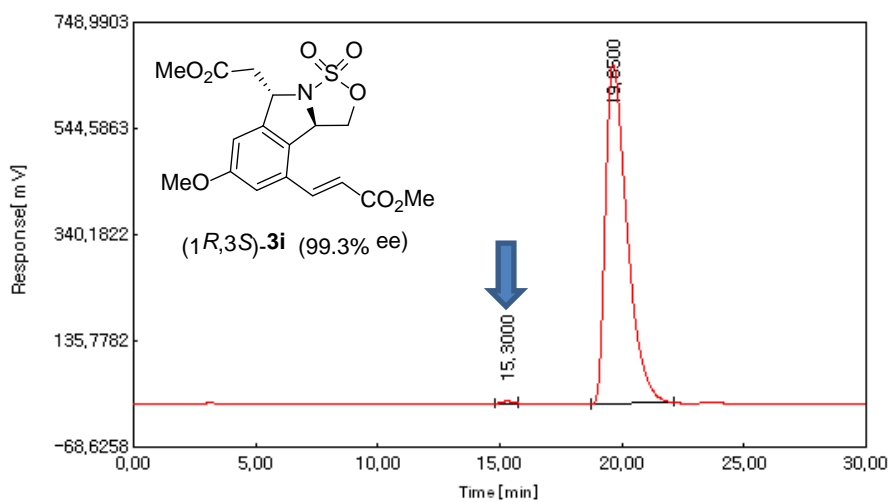

| Peak # | RT [min] | Area [mV*s] | BL | Wide [sec] | Area%   |
|--------|----------|-------------|----|------------|---------|
| 1      | 15.3000  | 156.6294    | FF | 59.0000    | 0.3719  |
| 2      | 19.6500  | 41961.5187  | BB | 205.0000   | 99.6281 |
| Total  |          | 42118.1484  |    |            |         |

► **Sample name: 3j**

► **Analysis condition:** Chiralcel OD-H, 30%IPA/n-hexane, 1.0ml/min, 215nm

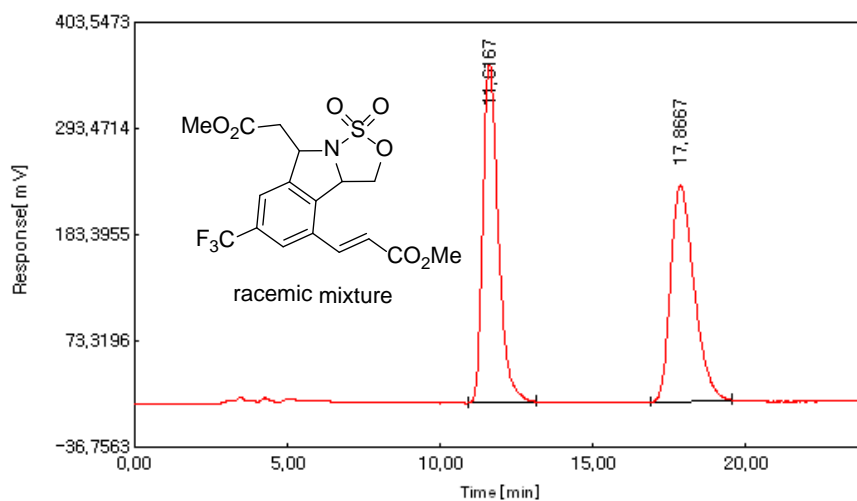

| Peak # | RT[min] | Area[mV*s] | BL | Wide[sec] | Area%   |
|--------|---------|------------|----|-----------|---------|
| 1      | 11.6167 | 12864.4116 | BB | 132.0000  | 50.9475 |
| 2      | 17.8667 | 12385.9046 | BB | 158.0000  | 49.0525 |
| Total  |         | 25250.3164 |    |           |         |

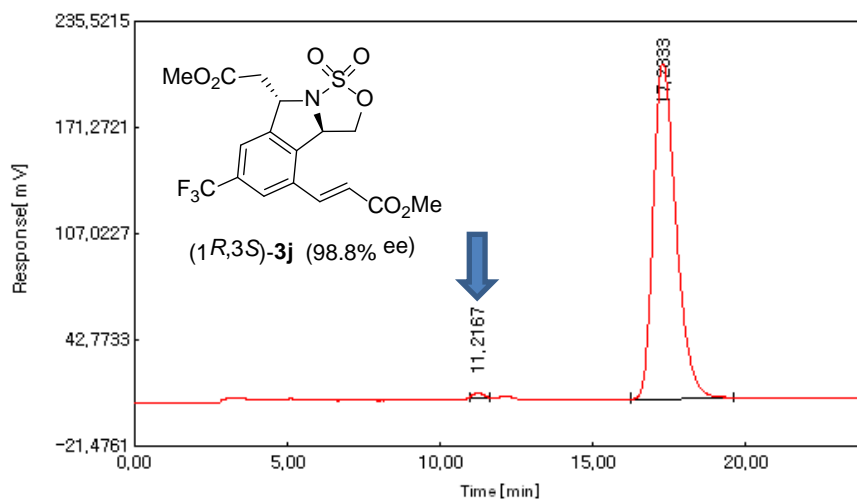

| Peak # | RT[min] | Area[mV*s] | BL | Wide[sec] | Area%   |
|--------|---------|------------|----|-----------|---------|
| 1      | 11.2167 | 63.5482    | FF | 39.0000   | 0.5776  |
| 2      | 17.2833 | 10937.9071 | FF | 202.0000  | 99.4224 |
| Total  |         | 11001.4551 |    |           |         |

► **Sample name: 3k**

► **Analysis condition: Chiralpak IC, 40%EtOH/n-hexane, 1.0ml/min, 215nm**

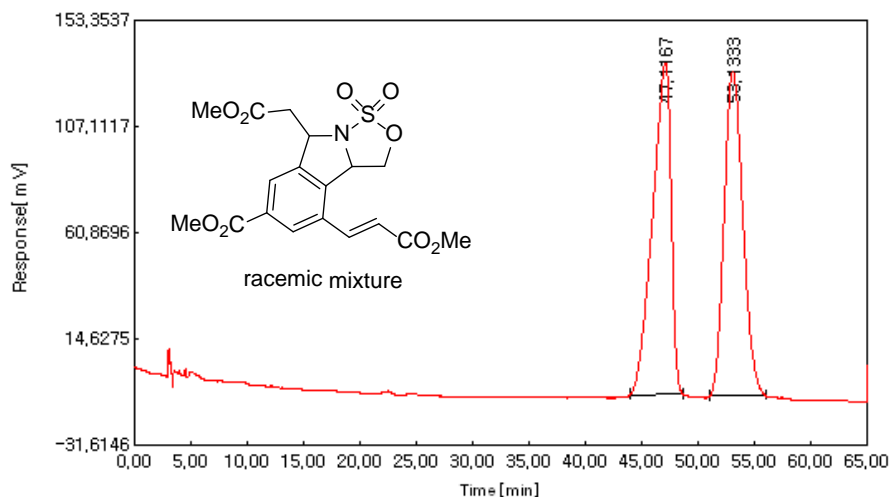

| Peak # | RT [min] | Area [mV*s] | BL | Wide [sec] | Area%   |
|--------|----------|-------------|----|------------|---------|
| 1      | 47.1167  | 16919.6976  | BB | 281.0000   | 50.1719 |
| 2      | 53.1333  | 16803.7854  | BB | 297.0000   | 49.8281 |
| Total  |          | 33723.4844  |    |            |         |

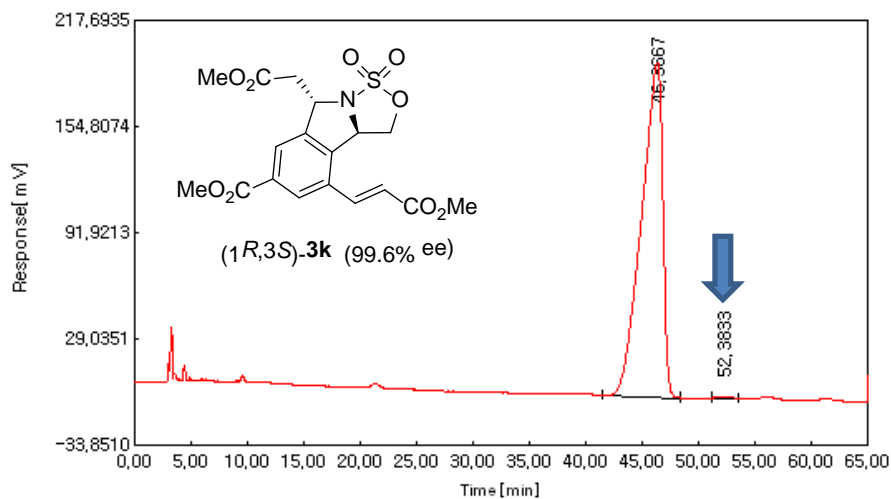

| Peak # | RT [min] | Area [mV*s] | BL | Wide [sec] | Area%   |
|--------|----------|-------------|----|------------|---------|
| 1      | 46.3667  | 26445.8875  | FF | 411.0000   | 99.7901 |
| 2      | 52.3833  | 55.6255     | FF | 137.0000   | 0.2099  |
| Total  |          | 26501.5117  |    |            |         |



► **Sample name: 3I**

► **Analysis condition:** Chiralpak IC, 10%EtOH/n-hexane, 1.0ml/min, 215nm

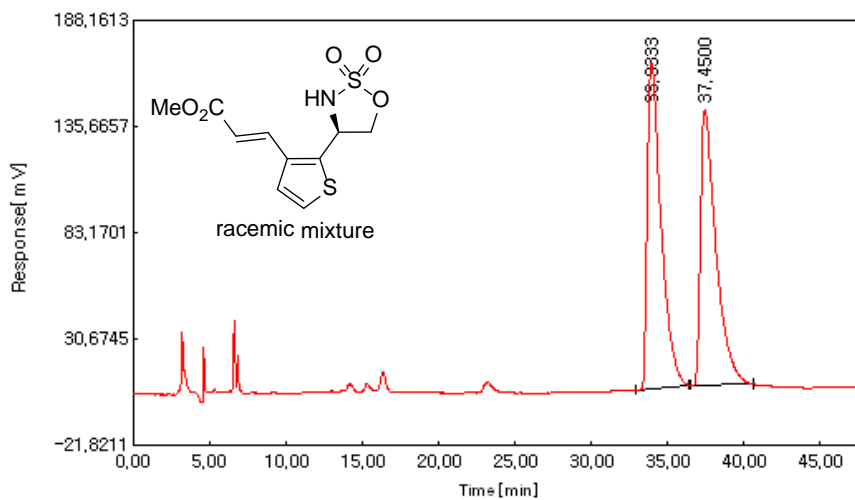

| Peak # | RT[min] | Area[mV*s] | BL | Wide[sec] | Area%   |
|--------|---------|------------|----|-----------|---------|
| 1      | 33.9333 | 10353.5611 | FF | 211.0000  | 51.2288 |
| 2      | 37.4500 | 9856.8699  | FF | 248.0000  | 48.7712 |
| Total  |         | 20210.4316 |    |           |         |

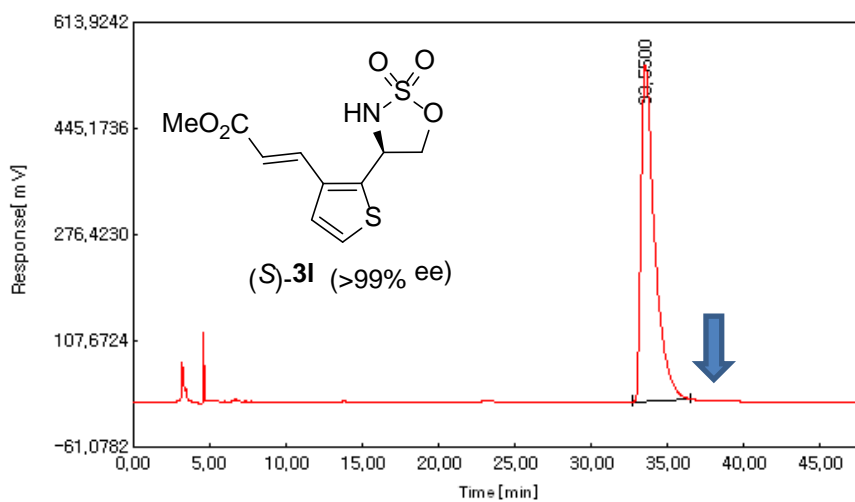

| Peak # | RT[min] | Area[mV*s] | BL | Wide[sec] | Area%    |
|--------|---------|------------|----|-----------|----------|
| 1      | 33.5500 | 33879.5617 | BB | 223.0000  | 100.0000 |
| Total  |         | 33879.5625 |    |           |          |

► **Sample name: 3m**

► **Analysis condition: Chiralcel OD-H, 30%IPA/n-hexane, 1.0ml/min, 215nm**

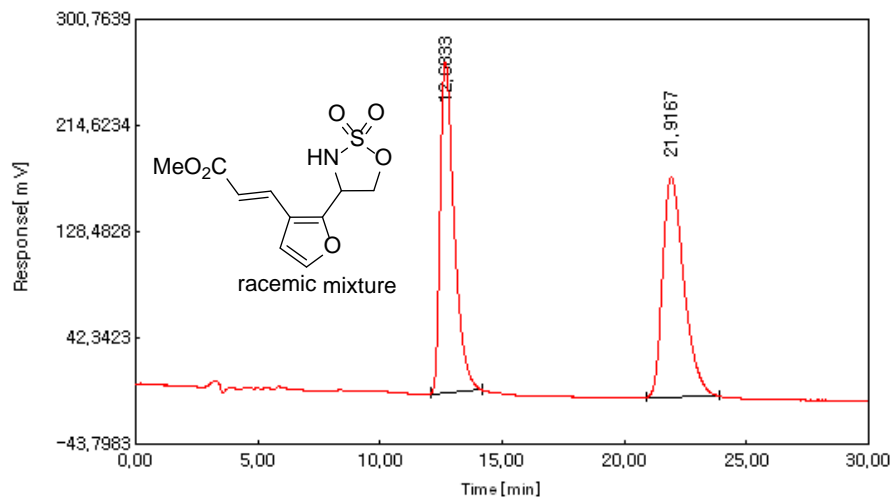

| Peak # | RT [min] | Area [mV*s] | BL | Wide [sec] | Area%   |
|--------|----------|-------------|----|------------|---------|
| 1      | 12.6833  | 11124.0456  | BB | 127.0000   | 49.8113 |
| 2      | 21.9167  | 11208.3124  | BB | 179.0000   | 50.1887 |
| Total  |          | 22332.3574  |    |            |         |

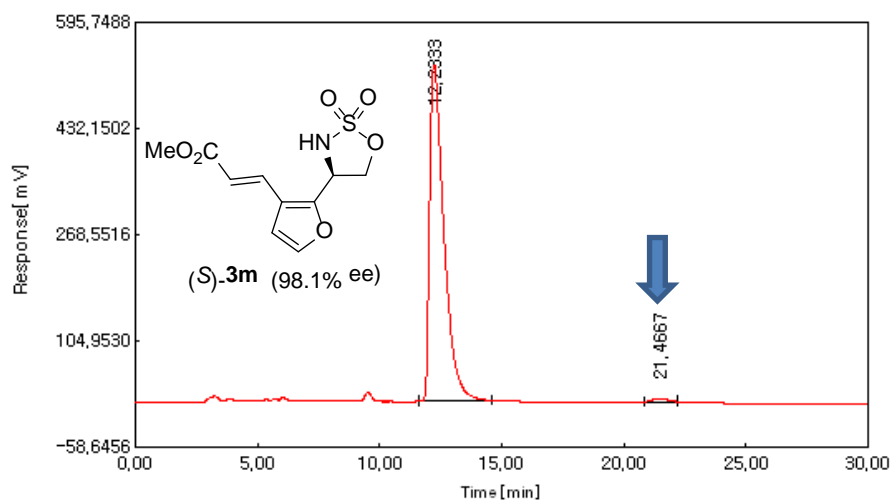

| Peak # | RT [min] | Area [mV*s] | BL | Wide [sec] | Area%   |
|--------|----------|-------------|----|------------|---------|
| 1      | 12.2333  | 21673.1318  | FF | 182.0000   | 99.0270 |
| 2      | 21.4667  | 212.9511    | FF | 79.0000    | 0.9730  |
| Total  |          | 21886.0820  |    |            |         |

► **Sample name: 3n**

► **Analysis condition: Chiralpak IC, 50%EtOH/n-hexane, 1.0ml/min, 215nm**

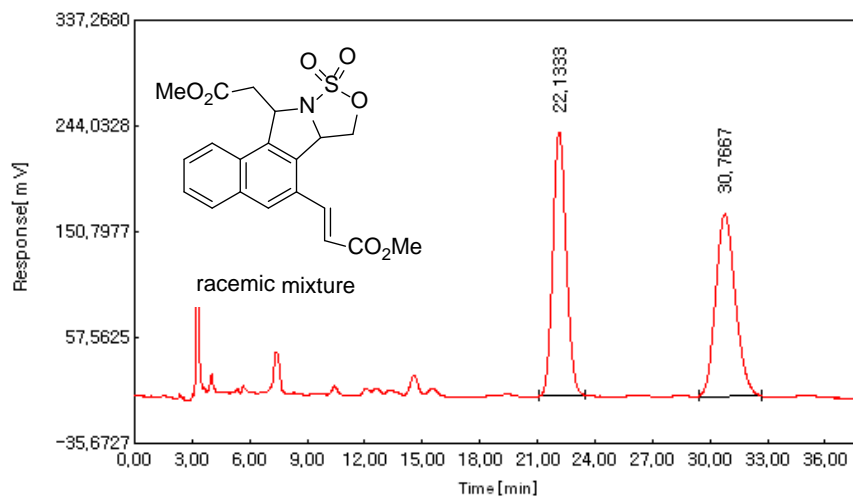

| Peak # | RT [min] | Area [mV*s] | BL | Wide [sec] | Area%   |
|--------|----------|-------------|----|------------|---------|
| 1      | 22.1333  | 11687.1699  | BB | 145.0000   | 49.5586 |
| 2      | 30.7667  | 11895.3693  | BB | 199.0000   | 50.4414 |
| Total  |          | 23582.5391  |    |            |         |

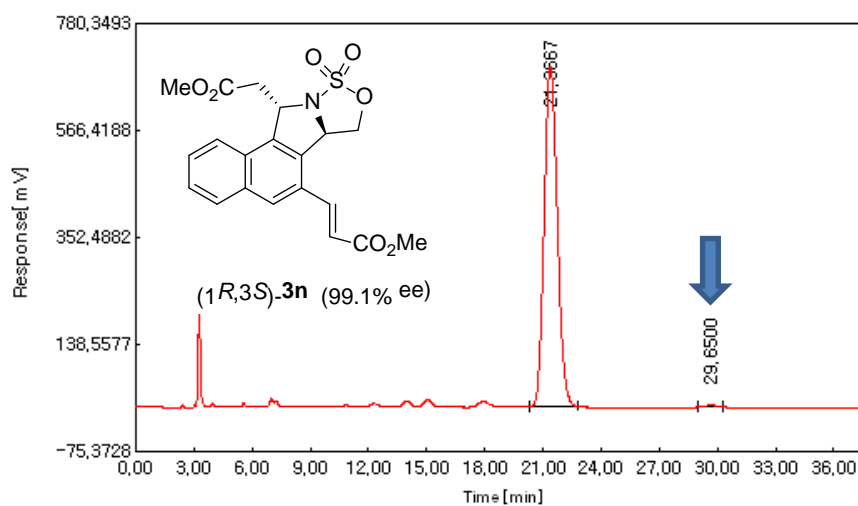

| Peak # | RT [min] | Area [mV*s] | BL | Wide [sec] | Area%   |
|--------|----------|-------------|----|------------|---------|
| 1      | 21.3667  | 33141.9075  | BB | 152.0000   | 99.5443 |
| 2      | 29.6500  | 151.7227    | FF | 77.0000    | 0.4557  |
| Total  |          | 33293.6289  |    |            |         |

► **Sample name:** (1*R*,3*S*)-**3ab**

► **Analysis condition:** Chiralpak IC, 20% EtOH/n-hexane, 1.0 ml/min, 254nm

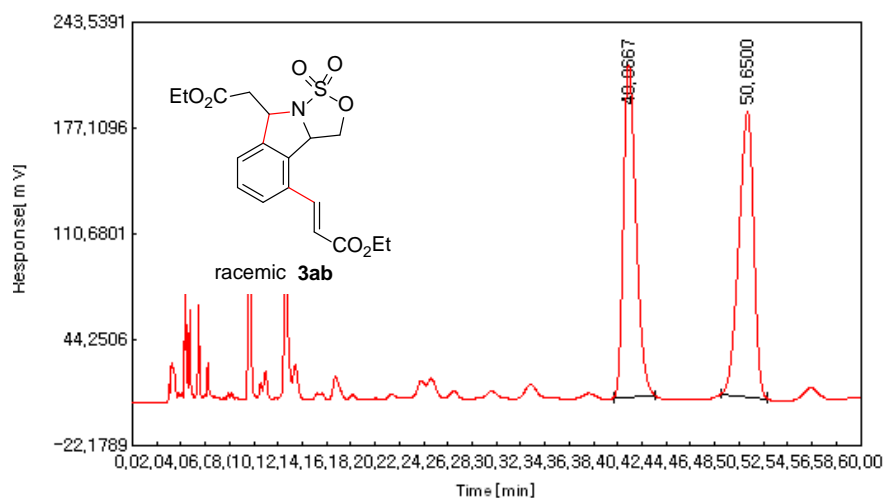

| Peak # | Time[min] | Area[mV*s] | BL | Wide[sec] | Area%   |
|--------|-----------|------------|----|-----------|---------|
| 1      | 40.8667   | 15577.1004 | BB | 211.0000  | 49.7761 |
| 2      | 50.6500   | 15717.2431 | BB | 230.0000  | 50.2239 |
| Total  |           | 31294.3438 |    |           |         |

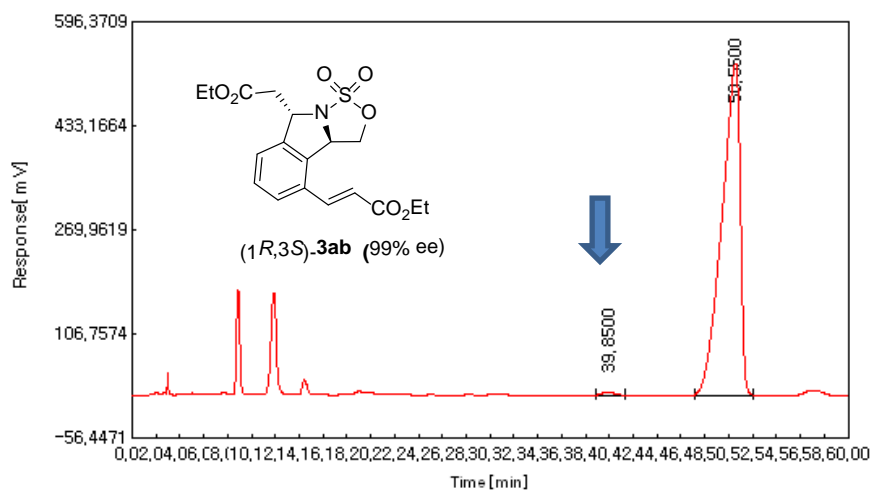

| Peak # | Time[min] | Area[mV*s] | BL | Wide[sec] | Area%   |
|--------|-----------|------------|----|-----------|---------|
| 1      | 39.8500   | 322.4641   | FF | 143.0000  | 0.5585  |
| 2      | 50.5500   | 57419.2212 | BB | 293.0000  | 99.4415 |
| Total  |           | 57741.6836 |    |           |         |

► **Sample name: (1*S*,3*R*)-3ab**

► **Analysis condition: Chiralpak IC, 20% EtOH/n-hexane, 1.0 ml/min, 254nm**

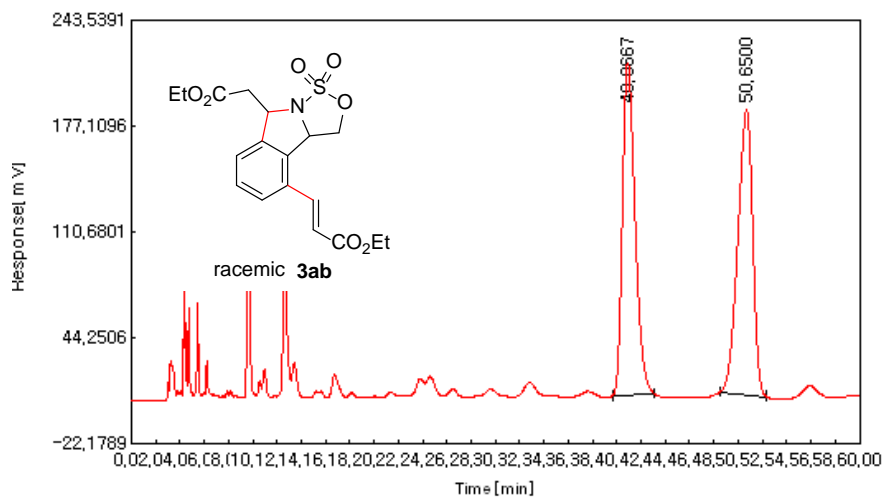

| Peak # | Time[min] | Area[mV*s] | BL | Wide[sec] | Area%   |
|--------|-----------|------------|----|-----------|---------|
| 1      | 40.8667   | 15577.1004 | BB | 211.0000  | 49.7761 |
| 2      | 50.6500   | 15717.2431 | BB | 230.0000  | 50.2239 |
| Total  |           | 31294.3438 |    |           |         |

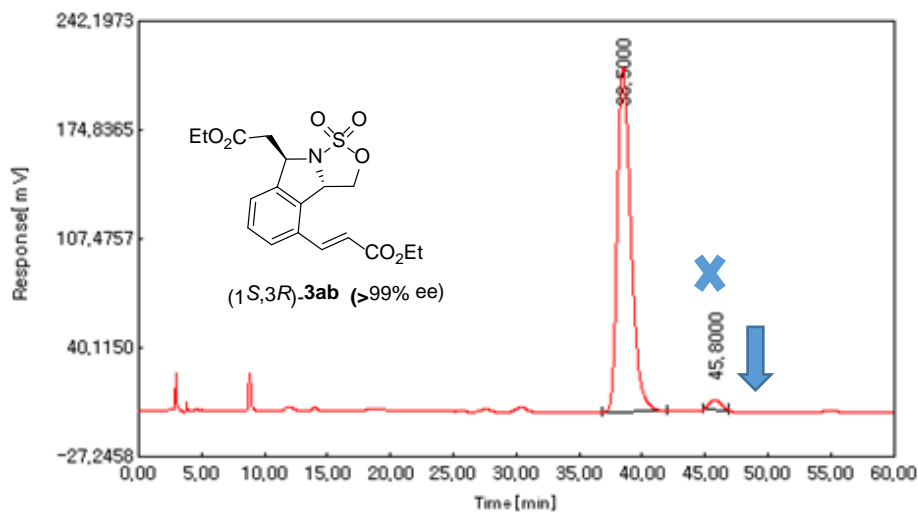

| Peak # | Time[min] | Area[mV*s] | BL | Wide[sec] | Area%    |
|--------|-----------|------------|----|-----------|----------|
| 1      | 38.5000   | 16291.3085 | FF | 306.0000  | 100.0000 |
| Total  |           | 16291.3085 |    |           |          |

► **Sample name: 3ac**

► **Analysis condition: Chiralpak IC, 20% EtOH/n-hexane, 1.0 ml/min, 254nm**

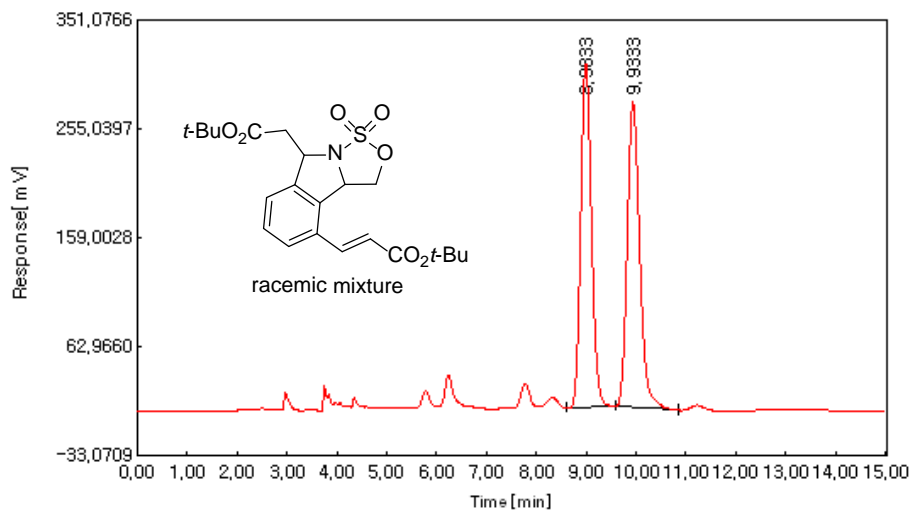

| Peak # | Time[min] | Area[mV*s] | BL | Wide[sec] | Area%   |
|--------|-----------|------------|----|-----------|---------|
| 1      | 8.9833    | 4605.5190  | BB | 58.0000   | 49.3164 |
| 2      | 9.9333    | 4733.2019  | BB | 76.0000   | 50.6836 |
| Total  |           | 9338.7207  |    |           |         |

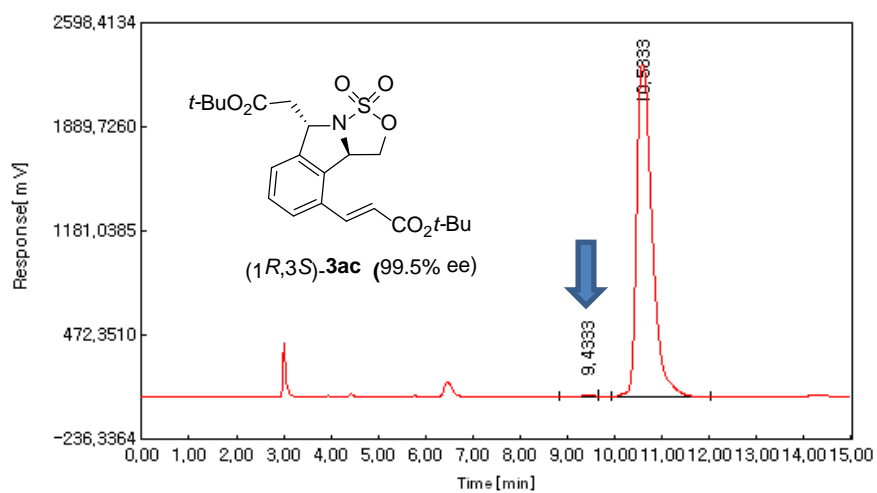

| Peak # | Time[min] | Area[mV*s] | BL | Wide[sec] | Area%   |
|--------|-----------|------------|----|-----------|---------|
| 1      | 9.4333    | 130.6417   | FF | 51.0000   | 0.2413  |
| 2      | 10.5833   | 54002.7480 | BB | 127.0000  | 99.7587 |
| Total  |           | 54133.3906 |    |           |         |

► **Sample name: 3bd**

► **Analysis condition: Chiralpak AD-H, 30% IPA/n-hexane, 0.7 ml/min, 215nm**

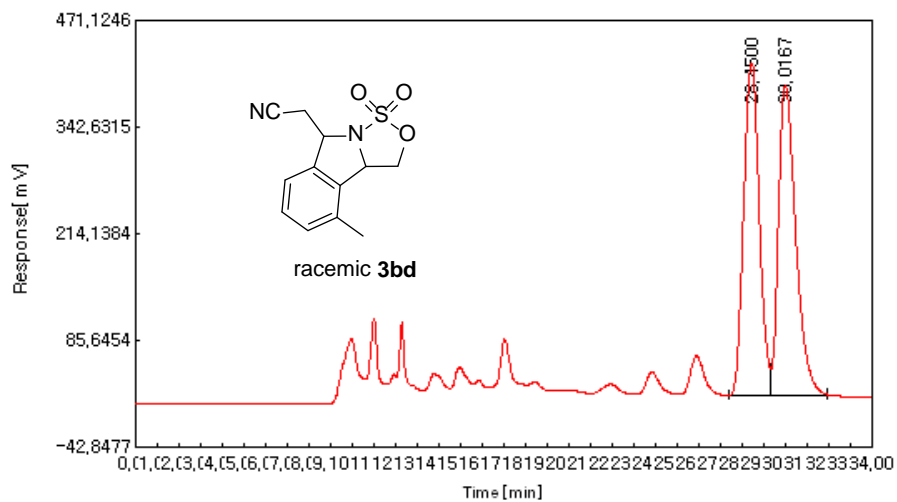

| Peak # | Time[min] | Area[mV*s] | BL | Wide[sec] | Area%   |
|--------|-----------|------------|----|-----------|---------|
| 1      | 28.4500   | 20793.8758 | BB | 116.0000  | 49.2533 |
| 2      | 30.0167   | 21424.3463 | BB | 157.0000  | 50.7467 |
| Total  |           | 42218.2227 |    |           |         |

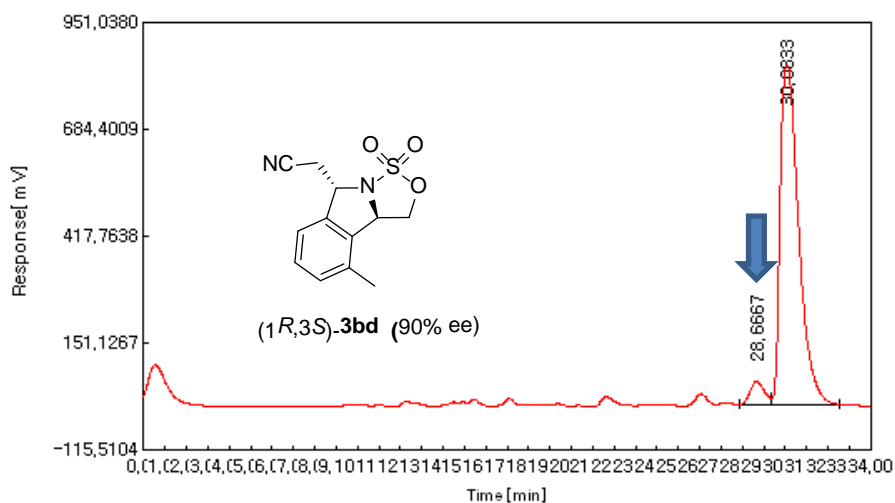

| Peak # | Time[min] | Area[mV*s] | BL | Wide[sec] | Area%   |
|--------|-----------|------------|----|-----------|---------|
| 1      | 28.6667   | 2774.2129  | BB | 90.0000   | 5.0040  |
| 2      | 30.0833   | 52665.8729 | BB | 192.0000  | 94.9960 |
| Total  |           | 55440.0859 |    |           |         |

► **Sample name: 3be**

► **Analysis condition: Chiralpak AD-H, 30% IPA/n-hexane, 0.7 ml/min, 215nm**

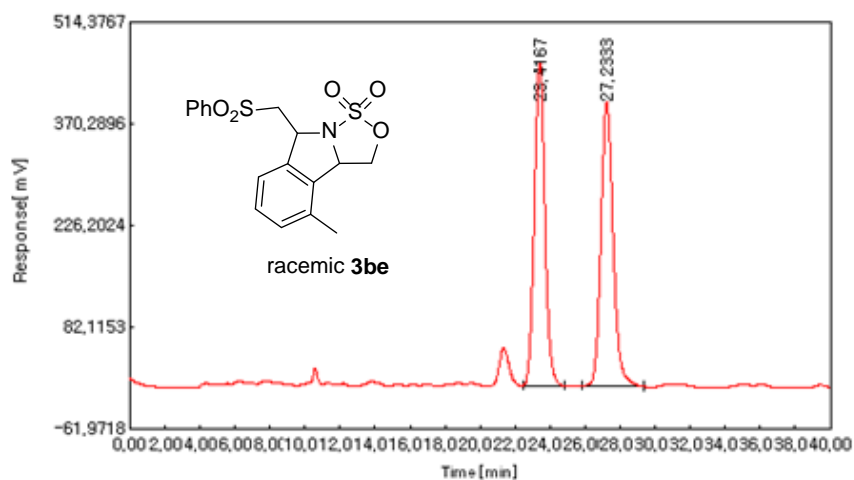

| Peak # | Time[min] | Area[mV*s] | BL | Wide[sec] | Area%   |
|--------|-----------|------------|----|-----------|---------|
| 1      | 23.4167   | 20009.8324 | BB | 143.0000  | 49.5343 |
| 2      | 27.2333   | 20386.0624 | BB | 209.0000  | 50.4657 |
| Total  |           | 40395.8945 |    |           |         |

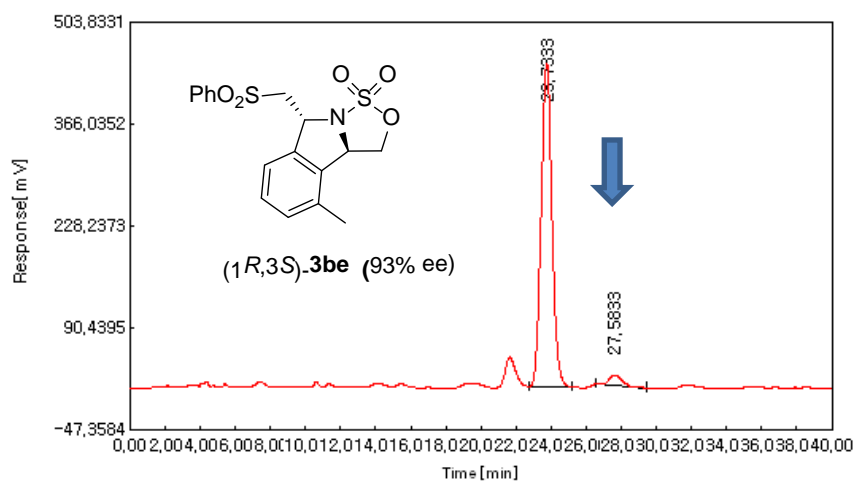

| Peak # | Time[min] | Area[mV*s] | BL | Wide[sec] | Area%   |
|--------|-----------|------------|----|-----------|---------|
| 1      | 23.7333   | 19337.7291 | BB | 143.0000  | 96.5832 |
| 2      | 27.5833   | 684.1124   | FF | 169.0000  | 3.4168  |
| Total  |           | 20021.8418 |    |           |         |
